# Supplementary material for: Computational screening for prediction of co-crystals: method comparison and experimental validation
Source: Royal Society of Chemistry journal article supplement (doi:10.1039/d3ce01252b), 2024-01-01
Supplement: d3ce01252b1.pdf [file d3ce01252b1.pdf]

## Supporting Information

### Computational screening for prediction of co-crystals: method comparison and experimental validation

Fateme Molajafari<sup>1</sup>, Tianrui Li<sup>2</sup>, Mehrnaz Abbasichaleshtori<sup>3</sup>, Moein Hajian Z.D.<sup>1</sup>, Anthony F. Cozzolino<sup>3</sup>, Daniel R. Fandrick<sup>2</sup>, Joshua D. Howe<sup>1,\*</sup>

<sup>1</sup>Department of Chemical Engineering, Texas Tech University, Lubbock, TX, 79409, USA

<sup>2</sup>Agios Pharmaceuticals Inc., Cambridge, MA 02139, USA

<sup>3</sup>Department of Chemistry and Biochemistry, Texas Tech University, Lubbock, TX, 79409, USA

\*Correspondence: [joshua.d.howe@ttu.edu](mailto:joshua.d.howe@ttu.edu) (J.D.H.)

#### Table of Contents

##### Theory and Model

COSMO-RS

Machine learning (ML)

Table S1. The optimized range of hyper-parameters used for ML models.

Table S2. List of coformers used for co-crystal screening through COSMOtherm and ML models **(independent test set)**.

Table S3. List of caffeine coformers within the ML training dataset.

##### Results

Table S4. ML models coformers' screening and ranking on the independent test set.

Table S5. Co-crystallization experiments attempted in this study.

Table S6. Experimental solubility measurements.

Table S7. Comparison of caffeine solubility predictions by COSMO-RS with experimental solubility measurements.

Table S8. Crystallographic data for Caff-Py co-crystal.

Table S9. Hydrogen bond information for Caff-Py co-crystal.

Figure S1. Caffeine solvents ranking by COSMO-RS.

Figure S2. Caffeine cofomers screening by COSMOtherm.

Figure S3. Enrichment plot of caffeine co-crystal screening by COSMOtherm.

Figure S4. Ranking of 29 experimental data points within the independent test by ML models.

Figure S5. PXRD patterns of Caffeine-Phosphoric acid co-crystals synthesized from different halogenated solvents.

Figure S6. Di-ATR FTIR spectra of Caff-PA-DCM co-crystal.

Figure S7. DSC thermogram of Caff-Py-DCM co-crystal.

Figure S8. DSC thermogram of Caff-PA-DCM co-crystal.

Figure S9. TGA of Caff-Py-DCM co-crystal.

Figure S10. TGA of Caff-PA-DCM co-crystal.

Figure S11.  $^1\text{H}$  NMR spectrum of Caff-Py-DCM co-crystal.

Figure S12.  $^1\text{H}$  NMR and  $^{31}\text{P}$  NMR spectra of Caff-Py-DCM co-crystal.

Figure S13. PLM of Caff-Py-DCM co-crystal.

Figure S14. Visualization of Caff-Py-DCM co-crystal scale-up process by EasyMax402.

Figure S15. PXRD patterns of Caff-Py-DCM co-crystal and Caff-Py-DCM scale-up.

Figure S16. The crystal packing of Caff-Py single crystal.

Figure S17. Crystal structure of Caff-Py single crystal.

Figure S18. Sigma profile overlay of caffeine and pyrogallol.

## Theory and Model

### COSMO-RS

COSMO-RS calculations begin with the computation of molecular surface screening charge densities through quantum mechanical calculations. To obtain the screening charge densities, the continuum solvation model COSMO is employed by COSMO-RS to model a virtual conductor environment for the molecule of interest. Next, the solute molecule in a virtual conductor environment induces a polarization charge density ( $\sigma$ ) on the molecular surface; subsequently, these charges generate a more polarized electron density than in a vacuum around the solute. The screening charge density serves as an appropriate descriptor of the molecular surface polarity<sup>2</sup>.

#### *Solvent screening and solubility prediction*

The COSMO-RS approach is formulated for liquid bulk systems, however, with the available thermodynamic data from external sources, the COSMO-RS method can be extended to treat solid systems<sup>3</sup>. COSMO-RS predicts the solubility of solid compounds in various solvents using equations below:

$$\Delta G_{fus} = \Delta H_{fus} - T \frac{\Delta H_{fus}}{T_m} \quad (1)$$

In the equation above,  $\Delta G_{fus}$ ,  $\Delta H_{fus}$ , and  $T_m$  denote the free energy of fusion, the enthalpy of fusion, and the melting point, respectively.

$$\ln(x_S) = [\mu_X - \mu_S - \Delta G_{fus}]/RT \quad (2)$$

Where  $\mu_X$ ,  $\mu_S$ ,  $R$ , and  $T$  denote the chemical potential of the pure compound and the compound in solution, gas constant, and temperature, respectively.  $\mu_X$  and  $\mu_S$  are calculated with high accuracy via COSMO-RS. COSMO-RS preresquires the  $\Delta G_{fus}$  to estimate the solubility of a compound in a solvent (using equation (2)).  $\Delta G_{fus}$  may be obtained either experimentally (through measuring  $T_m$  and  $\Delta H_{fus}$  by DSC and applying eq. (1)), through working with experimental reference solubilities and COSMO-RS chemical potential estimation (using eq. (2) and solving for  $\Delta G_{fus}$ ), or via a Quantitative Structure-Property Relationship (QSPR) model available in the COSMO-RS implementations.

### Co-crystal screening

COSMO-RS predicts the viability of co-crystal formation using equations below:

$$\Delta G_{CC} = \Delta H_{mix} - T\Delta S_{mix} - \Delta\Delta G_{fus} \approx \Delta H_{mix} \quad (3)$$

Where,  $\Delta S_{mix}$  and  $\Delta\Delta G_{fus}$  denote the entropy of mixing, and the difference between the free energy of fusion of the co-crystal and the reactants, respectively. We note that neglecting  $\Delta\Delta G_{fus}$  is an approximation that we expect to result in greater errors than neglecting  $\Delta S_{mix}$  because the former assumption neglects any enthalpic changes associated with the solid state order<sup>4</sup>. Accordingly, COSMO-RS starts from a virtually supercooled liquid mixture of the API and coformer and computes the mixing enthalpy,  $\Delta H_{mix}$ , as a closely related phenomenon to the strength of the interactions in the co-crystal phase compared to the pure reactants<sup>4</sup>:

$$\Delta H_{mix} = H_{API-coformer} - x_m H_{API} - x_n H_{coformer} = H_{ex} \quad (4)$$

In the equation above,  $H_{API-coformer}$ ,  $H_{API}$ ,  $H_{coformer}$ , and  $x$  denote the molar enthalpy of supercooled co-crystal, the molar enthalpies of API and coformer in the pure states, and the mole fraction, respectively. The enthalpic preference of the supercooled liquid phase is also valid in a mixed crystal; therefore, the use of the liquid phase  $H_{ex}$  as a guide for co-crystal screening, is applicable<sup>5</sup>. In COSMO-RS theory, two compounds with  $H_{ex} < 0$  are treated as miscible; the negative value of  $H_{ex}$  indicates that the molecular interactions in the supercooled liquid phase are thermodynamically more spontaneous compared to the pure forms.

### Machine learning

In this section, we provide brief descriptions of the three ML models and highlight the range of their configurations used for hyper-parameter optimization.

*Random Forest (RF)*. RF is a conventional ML algorithm that operates as an ensemble learning method, comprising multiple decision trees. In the context of classification tasks, RF outputs the class most frequently selected by these trees.

*Support Vector Machine (SVM)*. SVM is another conventional ML algorithm employed for both classification and regression (supervised learning model). SVM maps training samples to points in a multi-dimensional space, with the objective of maximizing the gap width between the two classes. This approach allows for new samples to be projected into the same space and classified based on which side of the gap they fall.

*Deep Neural Network (DNN)*. DNN is composed of dense layers. In DNN, complex patterns within datasets are captured by a stack of interconnected neurons. Interconnected layers of neurons are utilized as functional units for capturing intricate patterns within the feature distribution. The input features are initially passed through the input layer, then traversed through a series of hidden layers, and ultimately generate output through the output layer<sup>6</sup>.

### *Hyper-parameter optimization*

To search for the optimal hyper-parameters for the RF, SVM, and DNN models, grid search with 5-fold cross-validation was utilized.

Table S1. The optimized range of hyper-parameters used for ML models.

| Model | Hyper-parameters range                                                                                                                                                                                                                                                               |
|-------|--------------------------------------------------------------------------------------------------------------------------------------------------------------------------------------------------------------------------------------------------------------------------------------|
| RF    | 'bootstrap': [True, False]<br>'n_estimators': [10, 20, 30, 40, 50, 100, 150, 200, 300, 500]<br>'max_depth': [None, 5, 10, 15, 20, 30]<br>'min_samples_split': [2,3,4, 5,6,7,8,9, 10,12,15]<br>'min_samples_leaf': [1, 2, 3, 4, 5,10,15]<br>'max_features': [2, 5, 10, 15, 20, 30]    |
| SVM   | 'C': [ 0.1, 1, 10, 100]<br>'kernel': ['linear', 'rbf', 'poly', 'sigmoid']<br>'degree': [2, 3, 4]<br>'gamma': [0.0001, 0.001, 0.01, 0.1, 1]                                                                                                                                           |
| DNN   | 'Optimizer': Adam<br>'Activation function': ReLU, sigmoid<br>'Epoch': [10, 25, 50, 100, 150, 200, 300, 500]<br>'number of hidden layers': [1, 2, 3, 4, 5]<br>' Size of hidden layers ': [32, 64, 128]<br>'learning_rate': [0.1, 0.01, 0.001, 0.0001]<br>'l2_reg': [0.1, 0.01, 0.001] |

Table S2. Coformers used for co-crystal screening by COSMOtherm and the ML/QSAR model (**independent test set**).

| Compound                    | Co-crystal | Reference                          |
|-----------------------------|------------|------------------------------------|
| 1-Butanol                   | Unknown    | -                                  |
| 2,3,5,6-Tetramethylpyrazine | Unknown    | -                                  |
| 2,5-Dihydroxybenzoic acid   | Yes        | Bučar et al. <sup>7</sup>          |
| 2-Picolonic acid            | Unknown    | -                                  |
| 4-Cyanopyridine             | Unknown    | -                                  |
| 4-toluamide                 | No         | Wicker et al. <sup>8</sup>         |
| 6-Hydroxynicotinic acid     | Unknown    | -                                  |
| Acetamide                   | Unknown    | -                                  |
| Acetic acid                 | Yes        | Trask et al. <sup>9</sup>          |
| Aconitic acid               | Unknown    | -                                  |
| Adipic acid                 | Yes        | Bučar et al. <sup>10</sup>         |
| Ammonium alginate           | Unknown    | -                                  |
| Anisole                     | Unknown    | -                                  |
| Anthranilamide              | Yes        | Wicker et al. <sup>8</sup>         |
| Aspartame                   | Unknown    | -                                  |
| Aspartic acid               | Unknown    | -                                  |
| Aspirin                     | Unknown    | -                                  |
| Benzamide                   | Unknown    | -                                  |
| Benzoic acid                | Yes        | Bučar et al. <sup>11</sup>         |
| Betaine                     | Unknown    | -                                  |
| Butylated hydroxytoluene    | Unknown    | -                                  |
| Caffeic acid                | Yes        | Satyanarayana et al. <sup>12</sup> |
| Caprolactam                 | Unknown    | -                                  |
| Caprylic acid               | Unknown    | -                                  |
| Catechin                    | Yes        | Syed et al. <sup>13</sup>          |
| Catechol                    | No         | Syed et al. <sup>13</sup>          |
| Celecoxib                   | Unknown    | -                                  |
| Chloral hydrate             | Unknown    | -                                  |
| Chlorobenzene               | Unknown    | -                                  |
| Chloroform                  | No         | This work                          |
| Cholic Acid                 | Unknown    | -                                  |

|                           |         |                                      |
|---------------------------|---------|--------------------------------------|
| Cinnamic acid             | Yes     | Kumar et al. <sup>14</sup>           |
| Citric acid               | Yes     | Karki et al. <sup>15</sup>           |
| Cyclohexane               | Unknown | -                                    |
| d-10-Camphorsulfonic acid | Unknown | -                                    |
| D-Alanine                 | Unknown | -                                    |
| Dichloromethane           | No      | This work                            |
| Dimethyl sulfoxide        | Unknown | -                                    |
| DL-phenylalanine          | Unknown | -                                    |
| Embonic acid              | Unknown | -                                    |
| Ferulic acid              | Unknown | -                                    |
| Fumaric acid              | Unknown | -                                    |
| Gallic acid               | Yes     | Clarke et al. <sup>16</sup>          |
| Glutaric acid             | Yes     | Trask et al. <sup>17</sup>           |
| Glycerol                  | Unknown | -                                    |
| Glycine                   | Unknown | -                                    |
| Glycol stearate           | Unknown | -                                    |
| Glycolic acid             | Yes     | Alvarez-Lorenzo et al. <sup>18</sup> |
| Hexamethylenetetramine    | Unknown | -                                    |
| Hippuric acid             | Unknown | -                                    |
| Isoniazid                 | Unknown | -                                    |
| Isonicotinamide           | Unknown | -                                    |
| Lactic acid               | Unknown | -                                    |
| L-Pyroglutamic acid       | Unknown | -                                    |
| L-Tartaric acid           | Yes     | Friščić et al. <sup>19</sup>         |
| Maleic acid               | Yes     | Trask et al. <sup>20</sup>           |
| Malic acid                | Yes     | Leyssens et al. <sup>21</sup>        |
| Malonic acid              | Yes     | Trask et al. <sup>20</sup>           |
| Mannitol                  | Unknown | -                                    |
| Methyl 4-hydroxybenzoate  | Unknown | -                                    |
| MTBE                      | Unknown | -                                    |
| N,N-dimethylacetamide     | Unknown | -                                    |
| Naringenin                | Yes     | Cui et al. <sup>22</sup>             |
| n-Butyl acetate           | Unknown | -                                    |
| Nicotinamide              | Unknown | -                                    |
| Nicotinic acid            | Unknown | -                                    |
| Orcinol                   | Unknown | -                                    |
| Oxalic acid               | Yes     | Trask et al. <sup>20</sup>           |

|                        |         |                                      |
|------------------------|---------|--------------------------------------|
| Para-aminobenzoic acid | No      | Wicker et al. <sup>8</sup>           |
| Phosphoric acid        | Yes     | This work                            |
| Picolinamide           | Unknown | -                                    |
| Piperazine             | Unknown | -                                    |
| Proline                | Unknown | -                                    |
| Propanone              | Unknown | -                                    |
| Propyl gallate         | Unknown | -                                    |
| Propylene glycol       | Unknown | -                                    |
| Propylparaben          | Unknown | -                                    |
| Pterostilbene          | Yes     | Schultheiss et al. <sup>23</sup>     |
| Pyrazinamide           | Unknown | -                                    |
| Pyrazine               | Unknown | -                                    |
| Pyrogallol             | Yes     | This work                            |
| Quercetin              | Yes     | Smith et al. <sup>24</sup>           |
| Resorcinol             | No      | This work                            |
| Saccharin              | Yes     | Padrela et al. <sup>25</sup>         |
| Salicylic acid         | Yes     | Wicker et al. <sup>8</sup>           |
| Sebacic acid           | Unknown | -                                    |
| Serine                 | Unknown | -                                    |
| Sorbitol               | Unknown | -                                    |
| Suberic acid           | Unknown | -                                    |
| Succinic acid          | Yes     | Frišćić et al. <sup>26</sup>         |
| Sulfur dioxide         | Unknown | -                                    |
| Tert-butanol           | Unknown | -                                    |
| Theobromine            | Unknown | -                                    |
| Theophylline           | Yes     | Eddleston et al. <sup>27</sup>       |
| Urea                   | Yes     | MacFhionnghaile et al. <sup>28</sup> |
| Vanillic acid          | Yes     | Jacobs et al. <sup>29</sup>          |
| Vitamin C              | Unknown | -                                    |
| 1-Butanol              | Unknown | -                                    |

---



Table S3. Positive and negative co-crystal samples for caffeine in the training and test dataset.

| Compound                     | Co-crystal | Reference                  |
|------------------------------|------------|----------------------------|
| 1-Hydroxy-2-naphthoic acid   | Yes        | Bučar et al. <sup>30</sup> |
| 1-Naphthoxyacetic acid       | Yes        | Kumar et al. <sup>31</sup> |
| 2,3-Difluorobenzoic acid     | Yes        | Bučar et al. <sup>10</sup> |
| 2,3-Dihydroxybenzoic acid    | Yes        | Bučar et al. <sup>7</sup>  |
| 2,4-Dihydroxybenzoic acid    | Yes        | Bučar et al. <sup>7</sup>  |
| 2,4-Dinitrobenzoic acid      | Yes        | Ghosh et al. <sup>32</sup> |
| 2,5-Difluorobenzoic acid     | Yes        | Bučar et al. <sup>10</sup> |
| 2-Aminobenzoic acid          | Yes        | Wicker et al. <sup>8</sup> |
| 2-Chloro-5-nitroaniline      | Yes        | Ghosh et al. <sup>32</sup> |
| 2-Fluoro-5-nitro-aniline     | Yes        | Ghosh et al. <sup>32</sup> |
| 2-Fluoro-5-nitrobenzoic acid | Yes        | Ghosh et al. <sup>32</sup> |
| 2-Fluorobenzoic acid         | Yes        | Wicker et al. <sup>8</sup> |
| 2-Hydroxy-1-naphthoic acid   | Yes        | Bučar et al. <sup>30</sup> |
| 2-Iodo-4-nitroaniline        | Yes        | Ghosh et al. <sup>32</sup> |
| 2-Methoxybenzamide           | No         | Wicker et al. <sup>8</sup> |
| 2-Methoxybenzoic acid        | Yes        | Wicker et al. <sup>8</sup> |
| 2-Methylbenzamide            | No         | Wicker et al. <sup>8</sup> |
| 2-Methylbenzoic acid         | Yes        | Wicker et al. <sup>8</sup> |
| 2-Naphthoxyacetic acid       | Yes        | Kumar et al. <sup>31</sup> |
| 2-Nitrobenzamide             | No         | Wicker et al. <sup>8</sup> |
| 2-Nitrobenzoic acid          | Yes        | Wicker et al. <sup>8</sup> |
| 3,4-Dihydroxybenzoic acid    | Yes        | Bučar et al. <sup>7</sup>  |
| 3,5-Dihydroxybenzoic acid    | Yes        | Bučar et al. <sup>7</sup>  |
| 3-Aminobenzamide             | No         | Wicker et al. <sup>8</sup> |
| 3-Aminobenzoic acid          | No         | Wicker et al. <sup>8</sup> |
| 3-Fluorobenzamide            | Yes        | Wicker et al. <sup>8</sup> |
| 3-Fluorobenzoic acid         | Yes        | Wicker et al. <sup>8</sup> |
| 3-Hydroxy-2-naphthoic acid   | Yes        | Bučar et al. <sup>30</sup> |
| 3-Hydroxybenzoic acid        | Yes        | Wicker et al. <sup>8</sup> |
| 3-Methoxybenzamide           | No         | Wicker et al. <sup>8</sup> |
| 3-Methoxybenzoic acid        | Yes        | Wicker et al. <sup>8</sup> |
| 3-Methylbenzamide            | No         | Wicker et al. <sup>8</sup> |

|                              |     |                                |
|------------------------------|-----|--------------------------------|
| 3-Methylbenzoic acid         | Yes | Wicker et al. <sup>8</sup>     |
| 3-Nitrobenzamide             | Yes | Wicker et al. <sup>8</sup>     |
| 3-Nitrobenzoic acid          | Yes | Wicker et al. <sup>8</sup>     |
| 4-Aminobenzamide             | No  | Wicker et al. <sup>8</sup>     |
| 4-Chloro-3-nitroaniline      | Yes | Ghosh et al. <sup>32</sup>     |
| 4-Chloro-3-nitrobenzoic acid | Yes | Ghosh et al. <sup>32</sup>     |
| 4-Fluoro-3-nitroaniline      | Yes | Ghosh et al. <sup>32</sup>     |
| 4-Fluorobenzamide            | No  | Wicker et al. <sup>8</sup>     |
| 4-Fluorobenzoic acid         | No  | Wicker et al. <sup>8</sup>     |
| 4-Hydroxybenzamide           | Yes | Wicker et al. <sup>8</sup>     |
| 4-Hydroxybenzoic acid        | Yes | Wicker et al. <sup>8</sup>     |
| 4-Iodo-3-nitroaniline        | Yes | Ghosh et al. <sup>32</sup>     |
| 4-Methoxybenzamide           | Yes | Wicker et al. <sup>8</sup>     |
| 4-Methoxybenzoic acid        | No  | Wicker et al. <sup>8</sup>     |
| 4-Methylbenzoic acid         | No  | Wicker et al. <sup>8</sup>     |
| 4-Nitroaniline               | Yes | Ghosh et al. <sup>32</sup>     |
| 4-Nitrobenzamide             | Yes | Wicker et al. <sup>8</sup>     |
| 4-Nitrobenzoic acid          | No  | Wicker et al. <sup>8</sup>     |
| 5-Chlorosalicylic acid       | Yes | Shefter et al. <sup>33</sup>   |
| 6-Hydroxy-2-naphthoic acid   | Yes | Bučar et al. <sup>30</sup>     |
| Acetyl-L-carnitine HCl       | Yes | Zaworotko et al. <sup>34</sup> |
| Baicalein                    | Yes | Zaworotko et al. <sup>34</sup> |
| Chlorogenic acid             | Yes | Mukherjee et al. <sup>35</sup> |
| Creatine                     | Yes | Zaworotko et al. <sup>34</sup> |
| Cyanuric acid monohydrate    | Yes | Mukherjee et al. <sup>35</sup> |
| Diadzein                     | Yes | Zaworotko et al. <sup>34</sup> |
| Diaminodiphenyl sulfone      | Yes | Todaro et al. <sup>36</sup>    |
| Diethylbarbituric acid       | Yes | Craven et al. <sup>37</sup>    |
| Ellagic acid monohydrate     | Yes | Zaworotko et al. <sup>34</sup> |
| Eosin                        | Yes | Kumar et al. <sup>14</sup>     |
| Epicatechin gallate          | Yes | Zaworotko et al. <sup>34</sup> |
| Ethyl gallate (dihydrate)    | Yes | Mukherjee et al. <sup>35</sup> |
| Ethylvanillin                | Yes | Zaworotko et al. <sup>34</sup> |
| Febuxostat                   | Yes | Chava et al. <sup>12</sup>     |
| Ferulic acid                 | Yes | Zaworotko et al. <sup>34</sup> |
| Formic acid                  | Yes | Ghosh et al. <sup>32</sup>     |
| Furosemide                   | Yes | Goud et al. <sup>38</sup>      |

|                               |     |                                  |
|-------------------------------|-----|----------------------------------|
| Galocatechin                  | Yes | Zaworotko et al. <sup>34</sup>   |
| Genistein                     | Yes | Zaworotko et al. <sup>34</sup>   |
| Glucosamine HCl               | Yes | Zaworotko et al. <sup>34</sup>   |
| Hesperetin                    | Yes | Chadha et al. <sup>39</sup>      |
| Hesperidin                    | Yes | Zaworotko et al. <sup>34</sup>   |
| Lamotrigine                   | Yes | Leksič, et al. <sup>40</sup>     |
| Luteolin                      | Yes | Zaworotko et al. <sup>34</sup>   |
| Melatonin                     | Yes | Zaworotko et al. <sup>34</sup>   |
| Mesaconic acid                | Yes | Leysens et al. <sup>21</sup>     |
| Methyl gallate                | Yes | Sun et al. <sup>41</sup>         |
| Methylvanillin                | Yes | Zaworotko et al. <sup>34</sup>   |
| Niclosamide                   | Yes | Sanhui et al. <sup>42</sup>      |
| Norfloxacin                   | Yes | Chava et al. <sup>12</sup>       |
| O-formylphenoxy acetic acid   | Yes | Kumar et al. <sup>43</sup>       |
| p-Coumaric acid               | Yes | Schultheiss et al. <sup>44</sup> |
| P-formylphenoxy acetic acid   | Yes | Kumar et al. <sup>43</sup>       |
| P-formylphenoxypropionic acid | Yes | Kumar et al. <sup>43</sup>       |
| Piceatannol                   | Yes | Chava et al. <sup>12</sup>       |
| Propionic acid                | Yes | Karan et al. <sup>45</sup>       |
| Pyridoxine                    | Yes | Zaworotko et al. <sup>34</sup>   |
| Resveratrol                   | Yes | Chava et al. <sup>12</sup>       |
| Rosmarinic acid               | Yes | Zaworotko et al. <sup>34</sup>   |
| Rutin hydrate                 | Yes | Zaworotko et al. <sup>34</sup>   |
| Salicylamide                  | Yes | Wicker et al. <sup>8</sup>       |
| Silibinin                     | Yes | Zaworotko et al. <sup>34</sup>   |
| Sinapic acid                  | Yes | Chava et al. <sup>12</sup>       |
| Sulfacetamide                 | Yes | Leger et al. <sup>46</sup>       |
| Sulfaproxyline                | Yes | Gosh et al. <sup>47</sup>        |
| Syringic acid (tetrahydrate)  | Yes | Mukherjee et al. <sup>35</sup>   |
| Trifluoroacetic acid          | Yes | Trask et al. <sup>9</sup>        |
| Vitamin B1 hydrochloride      | Yes | Zaworotko et al. <sup>34</sup>   |
| Vitamin B2                    | Yes | Zaworotko et al. <sup>34</sup>   |
| Vitamin B9                    | Yes | Zaworotko et al. <sup>34</sup>   |

---

## Results

Table S4. Results of the ML models cofomers' screening and ranking on the independent test set.

(Experimental reports on the cofomers listed below can be found in Table S2.)

| Compound                    | RF         |         | SVM        |         | DNN        |         |
|-----------------------------|------------|---------|------------|---------|------------|---------|
|                             | Co-crystal | Ranking | Co-crystal | Ranking | Co-crystal | Ranking |
| 1-Butanol                   | 1          | 8       | 1          | 46      | 1          | 53      |
| 2,3,5,6-Tetramethylpyrazine | 1          | 81      | 1          | 82      | 1          | 82      |
| 2,5-Dihydroxybenzoic acid   | 1          | 27      | 1          | 59      | 1          | 47      |
| 2-Picolonic acid            | 1          | 79      | 1          | 70      | 1          | 77      |
| 4-Cyanopyridine             | 1          | 63      | 1          | 51      | 1          | 56      |
| 4-toluamide                 | 0          | 94      | 0          | 97      | 0          | 97      |
| 6-Hydroxynicotinic acid     | 1          | 12      | 1          | 76      | 1          | 78      |
| Acetamide                   | 1          | 49      | 1          | 53      | 1          | 50      |
| Acetic acid                 | 1          | 43      | 1          | 38      | 1          | 28      |
| Aconitic acid               | 1          | 29      | 1          | 40      | 1          | 22      |
| Adipic acid                 | 1          | 68      | 1          | 85      | 1          | 60      |
| Ammonium alginate           | 1          | 39      | 1          | 13      | 1          | 1       |
| Anisole                     | 0          | 93      | 1          | 83      | 0          | 91      |
| Anthranilamide              | 1          | 91      | 0          | 89      | 0          | 93      |
| Aspartame                   | 1          | 51      | 1          | 39      | 1          | 16      |
| Aspartic acid               | 1          | 24      | 1          | 63      | 1          | 34      |
| Aspirin                     | 1          | 15      | 1          | 74      | 1          | 46      |
| Benzamide                   | 0          | 97      | 0          | 96      | 0          | 96      |
| Benzoic acid                | 1          | 84      | 1          | 80      | 1          | 83      |
| Betaine                     | 1          | 58      | 1          | 34      | 1          | 41      |
| Butylated hydroxytoluene    | 1          | 20      | 1          | 35      | 1          | 12      |
| Caffeic acid                | 1          | 13      | 1          | 69      | 1          | 66      |
| Caprolactam                 | 0          | 92      | 1          | 55      | 1          | 68      |
| Caprylic acid               | 1          | 83      | 1          | 71      | 1          | 72      |
| Catechin                    | 1          | 6       | 1          | 16      | 1          | 13      |
| Catechol                    | 1          | 72      | 1          | 44      | 1          | 84      |
| Celecoxib                   | 1          | 70      | 1          | 25      | 1          | 7       |

|                           |   |    |   |    |   |    |
|---------------------------|---|----|---|----|---|----|
| Chloral hydrate           | 1 | 64 | 1 | 22 | 1 | 11 |
| Chlorobenzene             | 1 | 53 | 1 | 57 | 1 | 64 |
| Chloroform                | 1 | 55 | 1 | 18 | 1 | 30 |
| Cholic Acid               | 1 | 23 | 1 | 20 | 1 | 3  |
| Cinnamic acid             | 1 | 76 | 1 | 86 | 1 | 76 |
| Citric acid               | 1 | 33 | 1 | 24 | 1 | 14 |
| Cyclohexane               | 1 | 86 | 1 | 37 | 1 | 54 |
| d-10-Camphorsulfonic acid | 1 | 48 | 1 | 31 | 1 | 9  |
| D-Alanine                 | 1 | 34 | 1 | 72 | 1 | 51 |
| Dichloromethane           | 1 | 45 | 1 | 23 | 1 | 21 |
| Dimethyl sulfoxide        | 1 | 59 | 1 | 32 | 1 | 33 |
| DL-phenylalanine          | 1 | 90 | 0 | 95 | 1 | 87 |
| Embonic acid              | 1 | 19 | 1 | 15 | 1 | 4  |
| Ferulic acid              | 1 | 65 | 1 | 73 | 1 | 62 |
| Fumaric acid              | 1 | 42 | 1 | 27 | 1 | 18 |
| Gallic acid               | 1 | 1  | 1 | 12 | 1 | 49 |
| Glutaric acid             | 1 | 46 | 1 | 67 | 1 | 48 |
| Glycerol                  | 1 | 38 | 1 | 11 | 1 | 39 |
| Glycine                   | 1 | 18 | 1 | 58 | 1 | 36 |
| Glycol stearate           | 1 | 30 | 1 | 17 | 1 | 8  |
| Glycolic acid             | 1 | 14 | 1 | 26 | 1 | 23 |
| Hexamethylenetetramine    | 1 | 89 | 1 | 29 | 1 | 29 |
| Hippuric acid             | 1 | 32 | 1 | 87 | 1 | 73 |
| Isoniazid                 | 1 | 87 | 0 | 93 | 0 | 94 |
| Isonicotinamide           | 1 | 78 | 0 | 90 | 0 | 90 |
| Lactic acid               | 1 | 56 | 1 | 79 | 1 | 57 |
| L-Pyroglutamic acid       | 1 | 50 | 1 | 62 | 1 | 65 |
| L-Tartaric acid           | 1 | 7  | 1 | 9  | 1 | 31 |
| Maleic acid               | 1 | 41 | 1 | 28 | 1 | 19 |
| Malic acid                | 1 | 16 | 1 | 30 | 1 | 26 |
| Malonic acid              | 1 | 11 | 1 | 3  | 1 | 6  |
| Mannitol                  | 1 | 36 | 1 | 6  | 1 | 37 |
| Methyl 4-hydroxybenzoate  | 1 | 88 | 0 | 92 | 0 | 89 |
| MTBE                      | 1 | 5  | 1 | 61 | 1 | 74 |
| N,N-dimethylacetamide     | 1 | 21 | 1 | 81 | 1 | 81 |
| Naringenin                | 1 | 2  | 1 | 8  | 1 | 15 |

|                        |   |    |   |    |   |    |
|------------------------|---|----|---|----|---|----|
| n-Butyl acetate        | 1 | 82 | 1 | 78 | 1 | 85 |
| Nicotinamide           | 1 | 85 | 0 | 94 | 0 | 92 |
| Nicotinic acid         | 1 | 75 | 1 | 75 | 1 | 79 |
| Orcinol                | 1 | 71 | 1 | 5  | 1 | 70 |
| Oxalic acid            | 1 | 26 | 1 | 14 | 1 | 10 |
| Para-aminobenzoic acid | 0 | 96 | 0 | 88 | 0 | 88 |
| Phosphoric acid        | 1 | 74 | 1 | 19 | 1 | 5  |
| Picolinamide           | 0 | 95 | 0 | 91 | 0 | 95 |
| Piperazine             | 1 | 61 | 1 | 49 | 1 | 58 |
| Proline                | 1 | 47 | 1 | 41 | 1 | 67 |
| Propanone              | 1 | 28 | 1 | 54 | 1 | 71 |
| Propyl gallate         | 1 | 10 | 1 | 42 | 1 | 35 |
| Propylene glycol       | 1 | 35 | 1 | 52 | 1 | 43 |
| Propylparaben          | 1 | 52 | 1 | 77 | 1 | 80 |
| Pterostilbene          | 1 | 67 | 1 | 48 | 1 | 25 |
| Pyrazinamide           | 1 | 80 | 1 | 84 | 1 | 86 |
| Pyrazine               | 1 | 31 | 1 | 47 | 1 | 55 |
| Pyrogallol             | 1 | 3  | 1 | 2  | 1 | 75 |
| Quercetin              | 1 | 9  | 1 | 10 | 1 | 2  |
| Resorcinol             | 1 | 40 | 1 | 1  | 1 | 69 |
| Saccharin              | 1 | 44 | 1 | 50 | 1 | 20 |
| Salicylic acid         | 1 | 57 | 1 | 33 | 1 | 63 |
| Sebacic acid           | 1 | 60 | 1 | 60 | 1 | 42 |
| Serine                 | 1 | 25 | 1 | 36 | 1 | 40 |
| Sorbitol               | 1 | 37 | 1 | 7  | 1 | 38 |
| Suberic acid           | 1 | 77 | 1 | 68 | 1 | 52 |
| Succinic acid          | 1 | 17 | 1 | 45 | 1 | 27 |
| Sulfur dioxide         | 1 | 73 | 1 | 21 | 1 | 17 |
| Tert-butanol           | 1 | 4  | 1 | 56 | 1 | 59 |
| Theobromine            | 1 | 54 | 1 | 66 | 1 | 32 |
| Theophylline           | 1 | 69 | 1 | 65 | 1 | 44 |
| Urea                   | 1 | 66 | 1 | 43 | 1 | 24 |
| Vanillic acid          | 1 | 62 | 1 | 64 | 1 | 61 |
| Vitamin C              | 1 | 22 | 1 | 4  | 1 | 45 |

Table S5. Co-crystallization experiments attempted in this study.

| Caffeine-coformer        | Sample name               | Condition                                                                                                     | Result |
|--------------------------|---------------------------|---------------------------------------------------------------------------------------------------------------|--------|
| Caffeine-Resorcinol      | Caff-Res-H <sub>2</sub> O | Caff. (50 mg, 0.26 mmol) and Res. (28.35 mg, 0.26 mmol) dissolved in 1 ml H <sub>2</sub> O, stirred for 48 h  | SC     |
|                          | Caff-Res-DMF              | Caff. (30 mg, 0.15 mmol) and Res. (17.01 mg, 0.15 mmol) dissolved in 1ml DMF, stirred for 48 h                | N/A    |
|                          | Caff-Res-DCM              | Caff. (50 mg, 0.26 mmol) and Res. (28.35 mg, 0.26 mmol) dissolved in 2 ml DCM, stirred for 48 h               | N/A    |
|                          | Caff-2Res-DCM             | Caff. (50 mg, 0.26 mmol) and Res. (56.70 mg, 0.51 mmol) dissolved in 2 ml DCM, stirred for 48 h               | N/A    |
| Caffeine-Pyrogallol      | Caff-Py-H <sub>2</sub> O  | Caff. (25 mg, 0.13 mmol) and Py. (16.24 mg, 0.13 mmol) dissolved in 1 ml H <sub>2</sub> O, stirred for 48 h   | A      |
|                          | Caff-Py-DMF               | Caff. (30 mg, 0.15 mmol) and Py. (19.48 mg, 0.15 mmol) dissolved in 1 ml DMF, stirred for 48 h                | A      |
|                          | Caff-Py-DMF               | Caff. (50 mg, 0.26 mmol) and Py. (32.47 mg, 0.26 mmol) dissolved in 2 ml DMF, stirred for 48 h                | A      |
|                          | Caff-Py-DCM               | Caff. (50 mg, 0.26 mmol) and Py. (32.47 mg, 0.26 mmol) dissolved in 2 ml DCM, stirred for 48 h                | N      |
|                          | Caff-2Py-DCM              | Caff. (50 mg, 0.26 mmol) and Py. (64.94 mg, 0.51 mmol) dissolved in 2 ml DCM, stirred for 48 h                | N      |
| Caffeine-Phosphoric acid | Caff-PA-H <sub>2</sub> O  | Caff. (100 mg, 0.51 mmol) and PA. (50.46 mg, 0.51 mmol) dissolved in 2 ml H <sub>2</sub> O, stirred for 48 h  | A      |
|                          | Caff-PA-DMF               | Caff. (88.32 mg, 0.45 mmol) and PA. (44.57 mg, 0.45 mmol) dissolved in 2 ml DMF, stirred for 48 h             | A      |
|                          | Caff-PA-DCM               | Caff. (220 mg, 1.13 mmol) and PA. (111.01 mg, 1.13 mmol) dissolved in 2 ml DCM, stirred for 48 h              | A      |
|                          | Caff-2PA-H <sub>2</sub> O | Caff. (100 mg, 0.51 mmol) and PA. (100.93 mg, 1.03 mmol) dissolved in 2 ml H <sub>2</sub> O, stirred for 48 h | A      |
|                          | Caff-2PA-DCM              | Caff. (220 mg, 1.13 mmol) and PA. (222.02 mg, 2.27 mmol) dissolved in 2 ml DCM, stirred for 48 h              | N      |
|                          | Caff-2PA-DCE              | Caff. (220 mg, 1.13 mmol) and PA. (222.02 mg, 2.27 mmol) dissolved in 2 ml DCE, stirred for 48 h              | N      |
|                          | Caff-2PA-TCM              | Caff. (220 mg, 1.13 mmol) and PA. (222.02 mg, 2.27 mmol) dissolved in 2 ml TCM, stirred for 48 h              | N      |

\* A = amorphous solid, N = new crystalline phase, N/A = no solids formed, and SC = solids co-former isolated.

Table S6. Experimental logarithmic solubilities of caffeine in 13 solvents measured by HPLC.

| Solvent                   | Log S (g/l) |
|---------------------------|-------------|
| Dichloromethane (DCM)     | 1.89        |
| Dimethylacetamide (DMA)   | 1.46        |
| Dimethylformamide (DMF)   | 1.44        |
| Dimethyl sulfoxide (DMSO) | 1.44        |
| Acetonitrile (ACN)        | 1.35        |
| Water                     | 1.33        |
| Acetone                   | 0.97        |
| Methanol                  | 0.95        |
| Toluene                   | 0.72        |
| Ethanol                   | 0.61        |
| 2-Propanol                | 0.52        |
| 2-Butanone                | 0.32        |
| Tetrahydrofuran (THF)     | 0.12        |

Table S7. Deviation of solubility predictions by three COSMO-RS implementations from experimental solubility measurements by HPLC presented as RMSD.

| Implementation | Input type                        | Reference solvent                            | RMSD*<br>(log S(g/l)) |
|----------------|-----------------------------------|----------------------------------------------|-----------------------|
| ADF COSMO-RS   | Experimental fusion data          | -                                            | 0.64                  |
| COSMOtherm     | Experimental fusion data          | -                                            | 0.51                  |
| COSMOtherm     | Experimental reference solubility | water                                        | 0.50                  |
| COSMOquick     | Experimental fusion data          | -                                            | 0.57                  |
| COSMOquick     | Experimental reference solubility | water, ethanol, acetone, and tetrahydrofuran | 0.49                  |

\*The RMSD is calculated based on solubilities measured in g/l in a logarithmic scale.



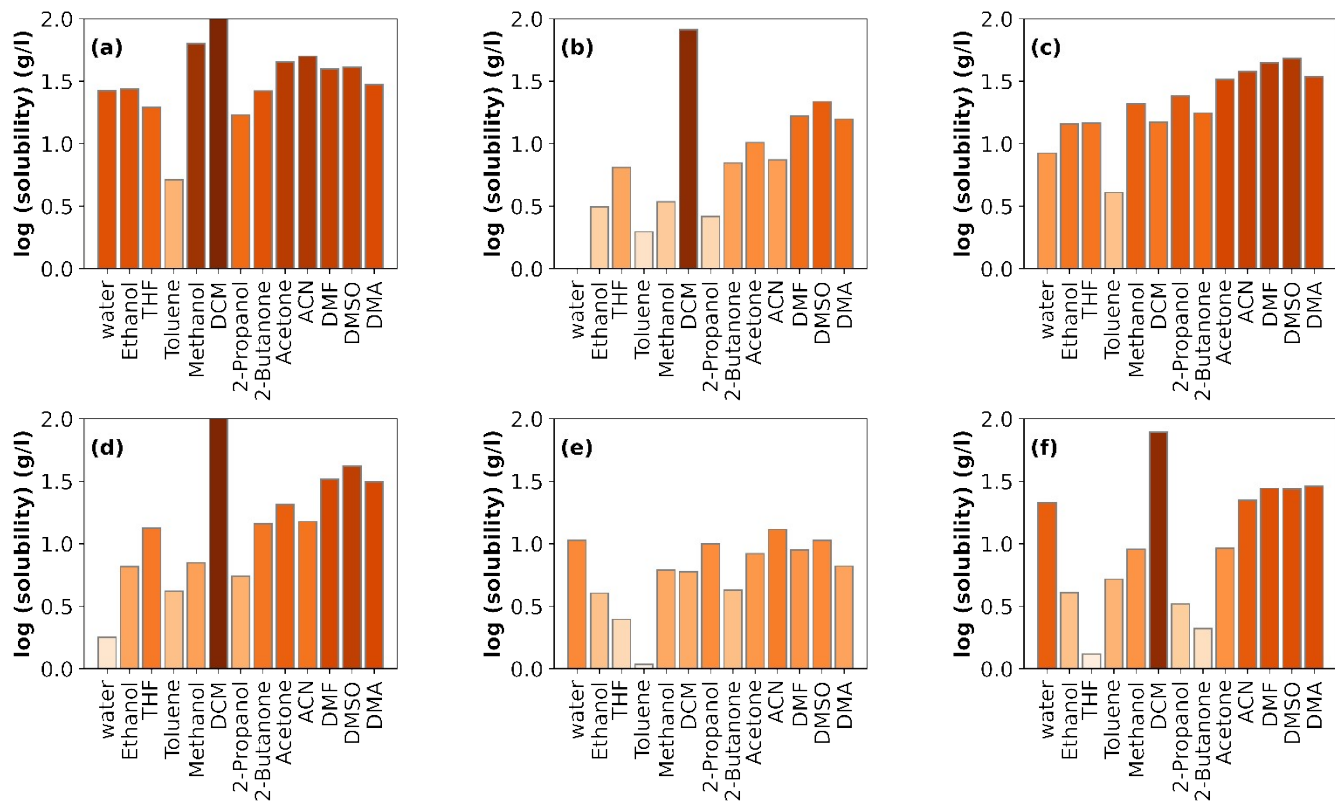

Figure S1. Caffeine solvents rankings by (a) ADF COSMO-RS (exp. fusion data), (b) COSMOtherm (exp. fusion data), (c) COSMOquick (exp. fusion data), (d) COSMOtherm (exp. sol. ref.), (e) COSMOquick (sol. ref.), and (f) experimental solubility by HPLC.

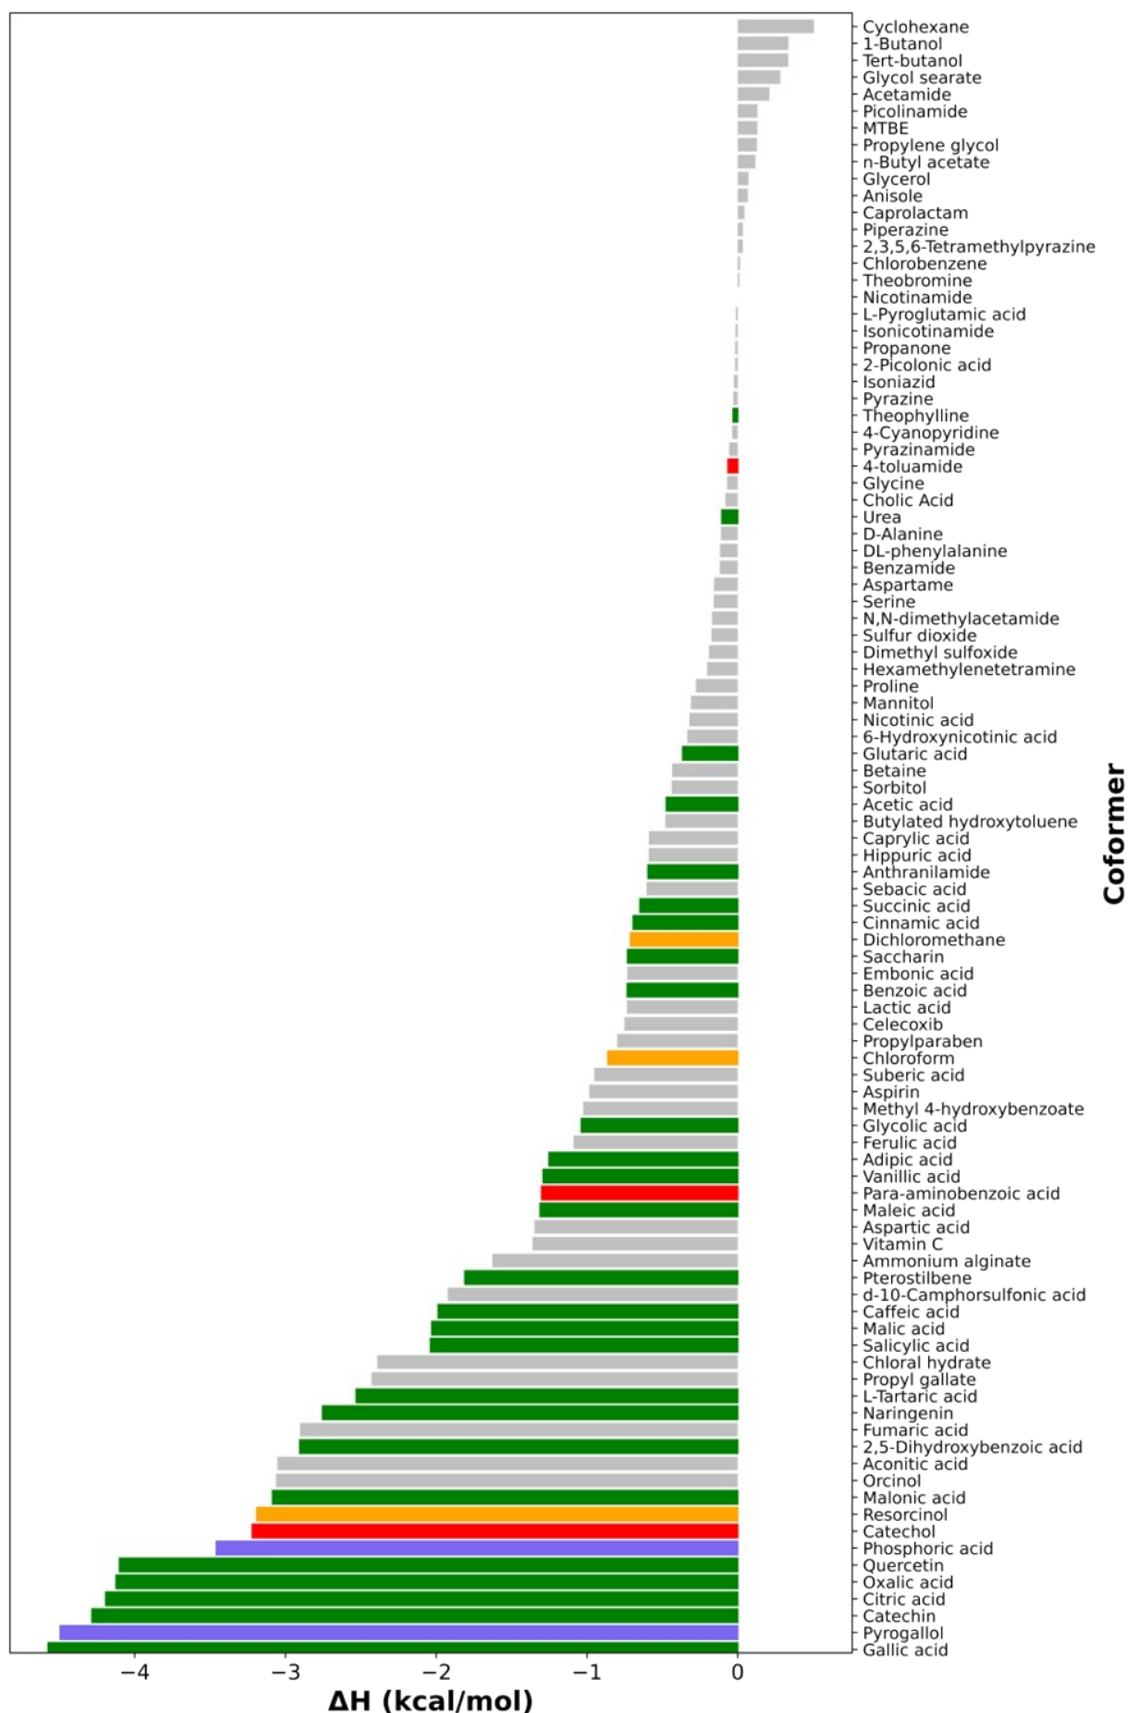

Figure S2. Caffeine co-crystal screening by COSMOtherm. Known caffeine coformers are shown in green and non-coformers are in red. Newly synthesized co-crystals in this study are highlighted in purple, while coformers that did not result in co-crystal formation are marked in orange.

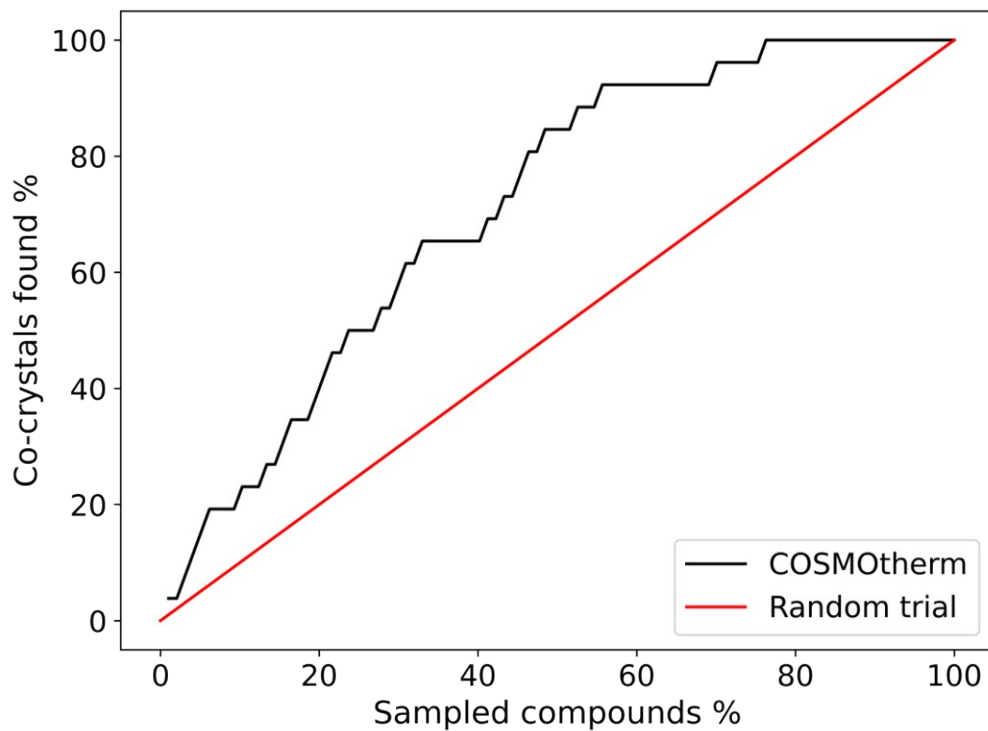

Figure S3. Enrichment plot of caffeine co-crystal screening by COSMOtherm. The dataset encompasses 26 co-crystal formers, three non-coformers, and 68 unknown cofomers. (Non-coformers and unknown cofomers were assigned a value of 0.)

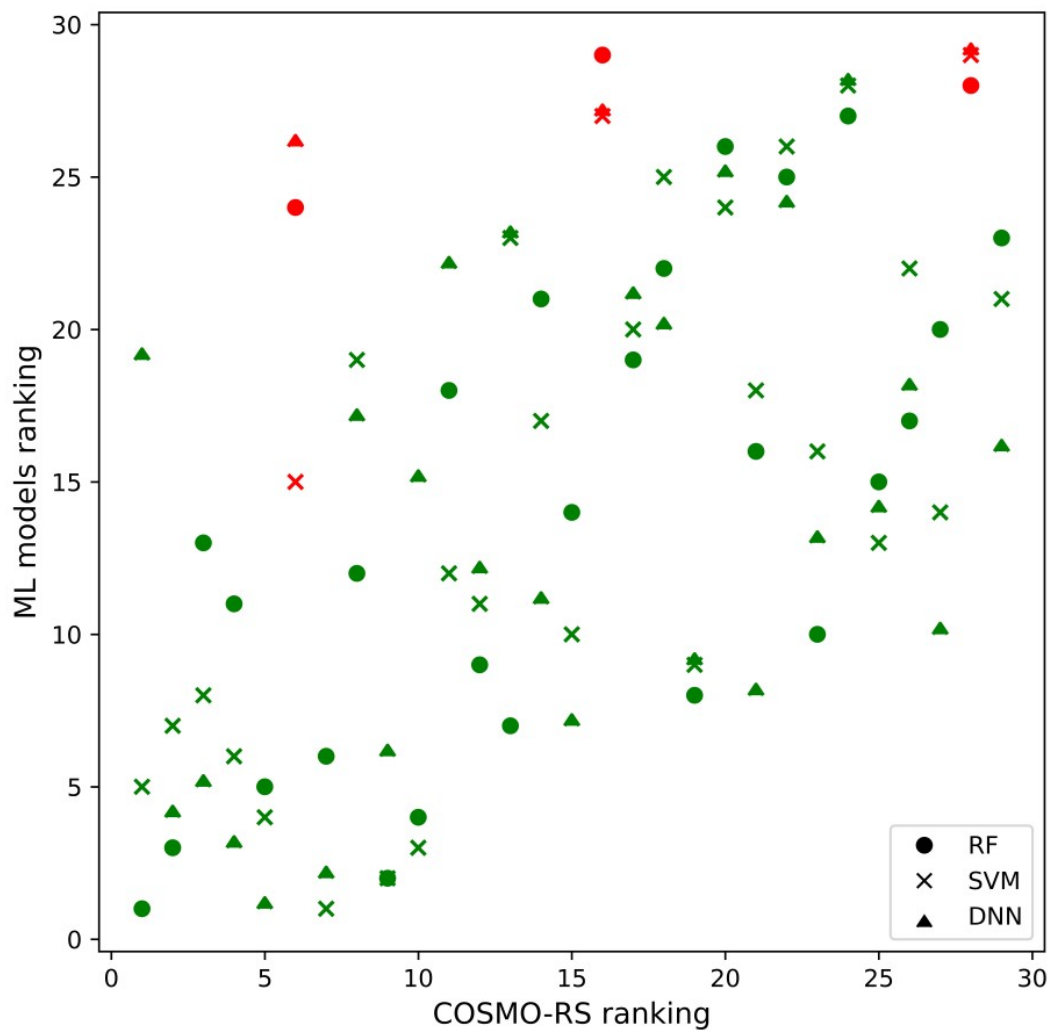

Figure S4. Ranking of 29 experimental data points within the independent test set, arranged according to probability estimates from the RF, SVM, and DNN models. Green symbols denote successful co-crystals, and red symbols represent unsuccessful cofomers.

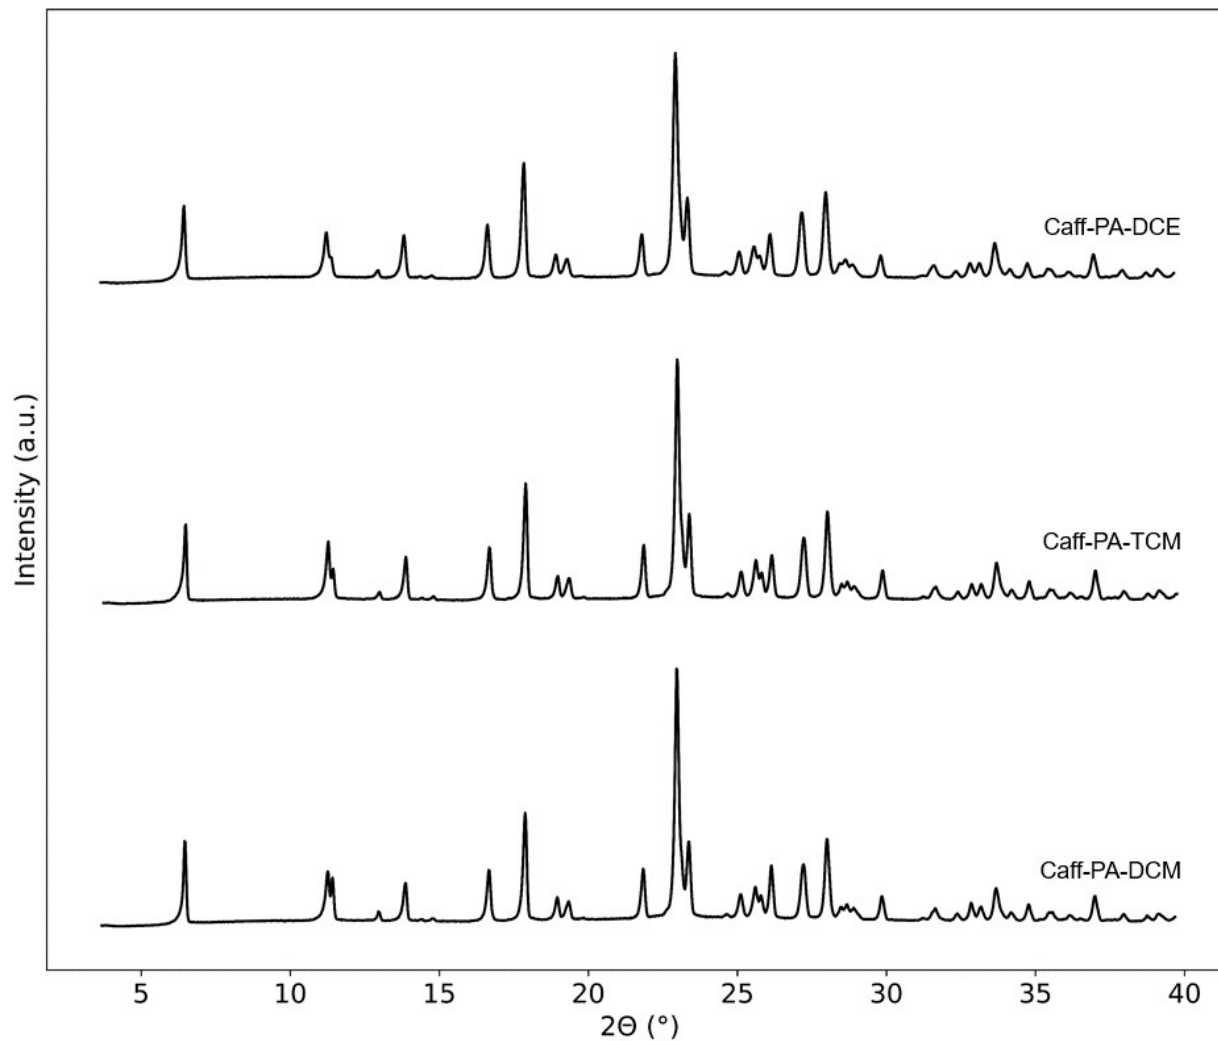

Figure S5. PXRD patterns of Caff-PA co-crystal from dichloroethane (DCE), chloroform (TCM), and dichloromethane (DCM).

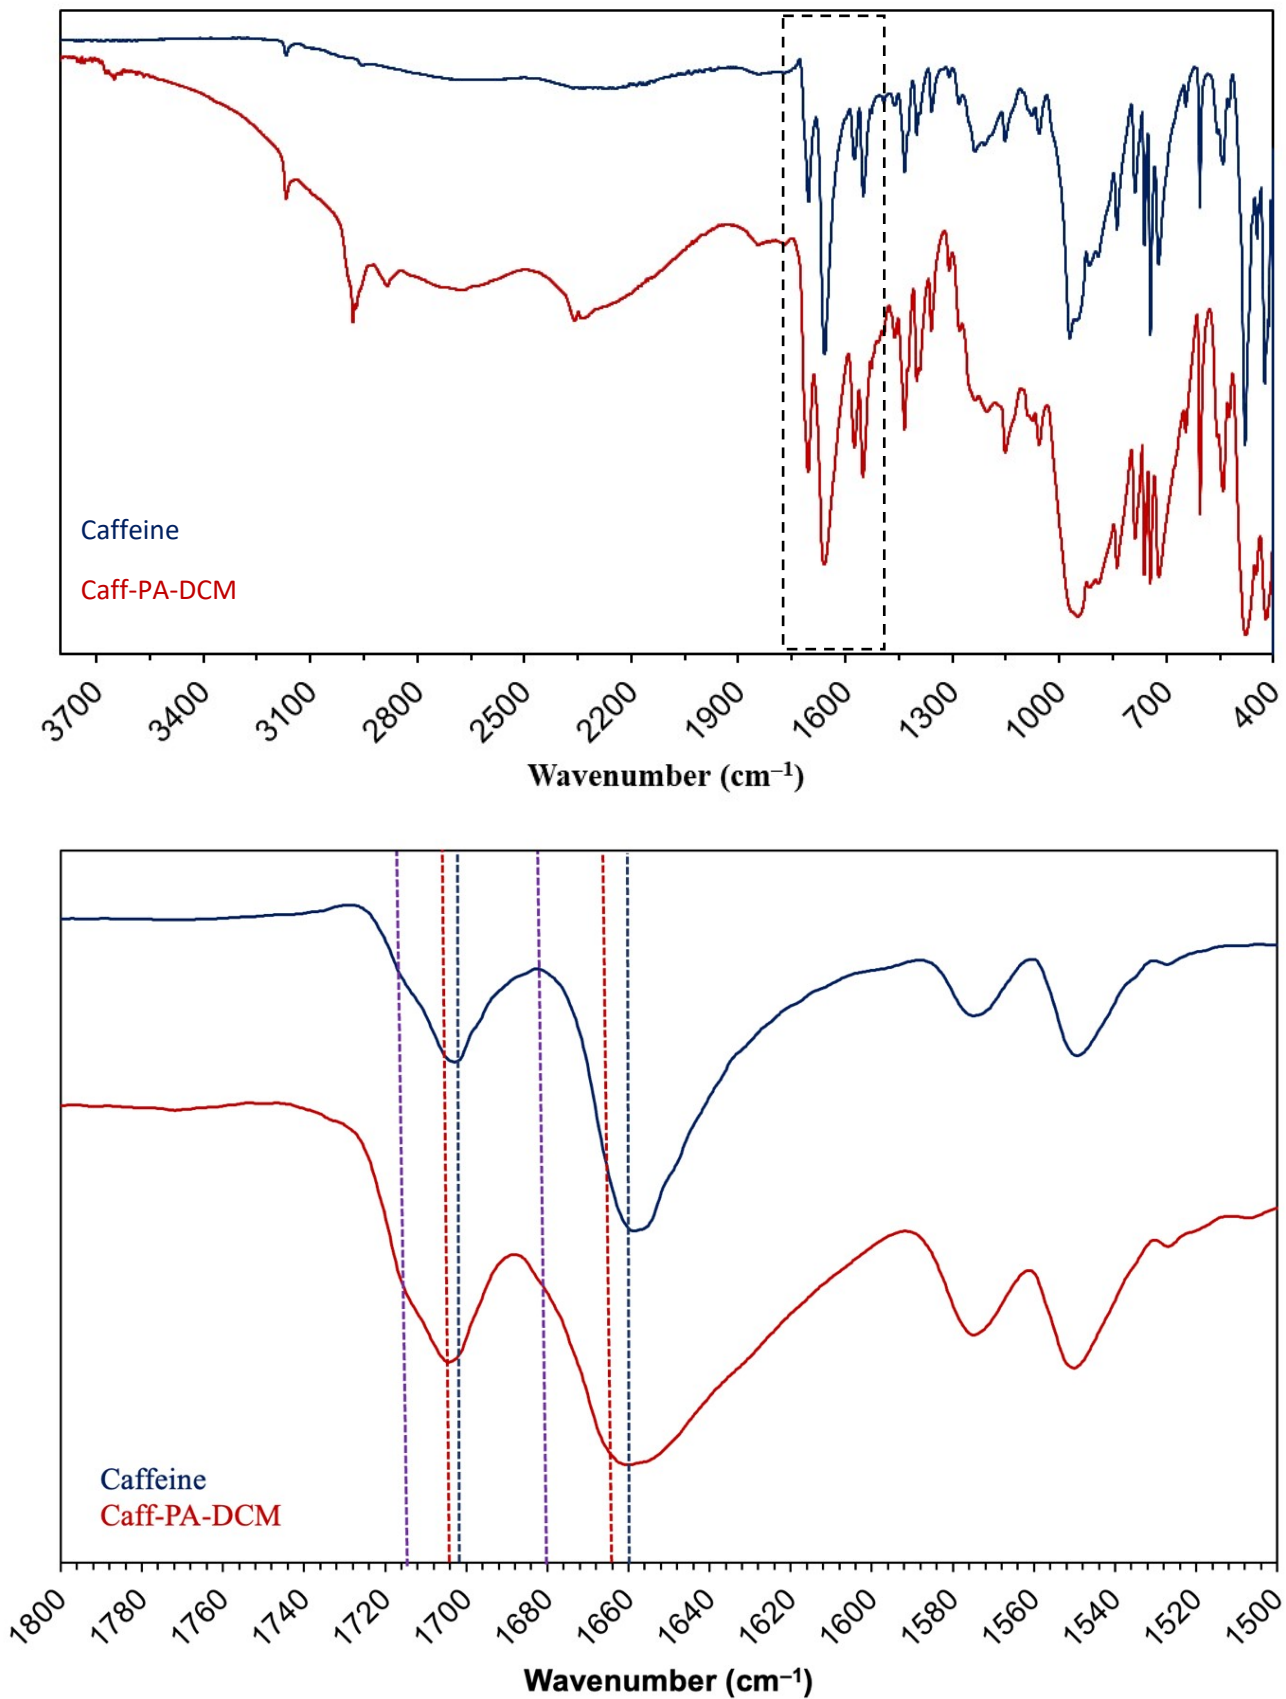

Figure S6. (Top) Di-ATR FTIR spectra of caffeine (blue) and Caff-PA-DCM (red), and (bottom) enlarged Di-ATR FTIR spectra of caffeine (blue) and Caff-PA-DCM (red) from 1500-1800 cm<sup>-1</sup>. The hashed lines represent the  $\nu_{\text{CO}}$  shifts in caffeine (blue), Caff-PA-DCM (red) and the caffeine HCl salt (purple)<sup>1</sup>.

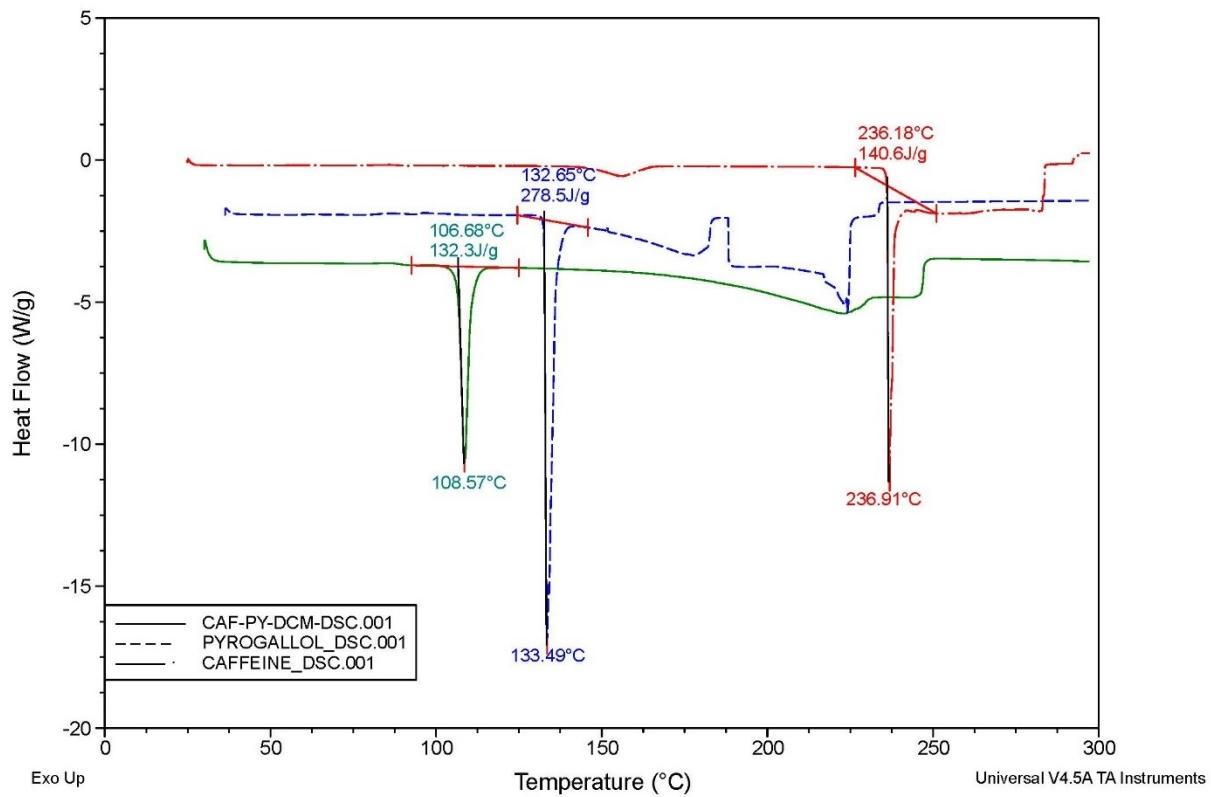

Figure S7. DSC thermogram (overlay) of caffeine, pyrogallol, and Caff-Py-DCM co-crystal. Color scheme: caffeine (red), pyrogallol (blue), and Caff-Py co-crystal (green).

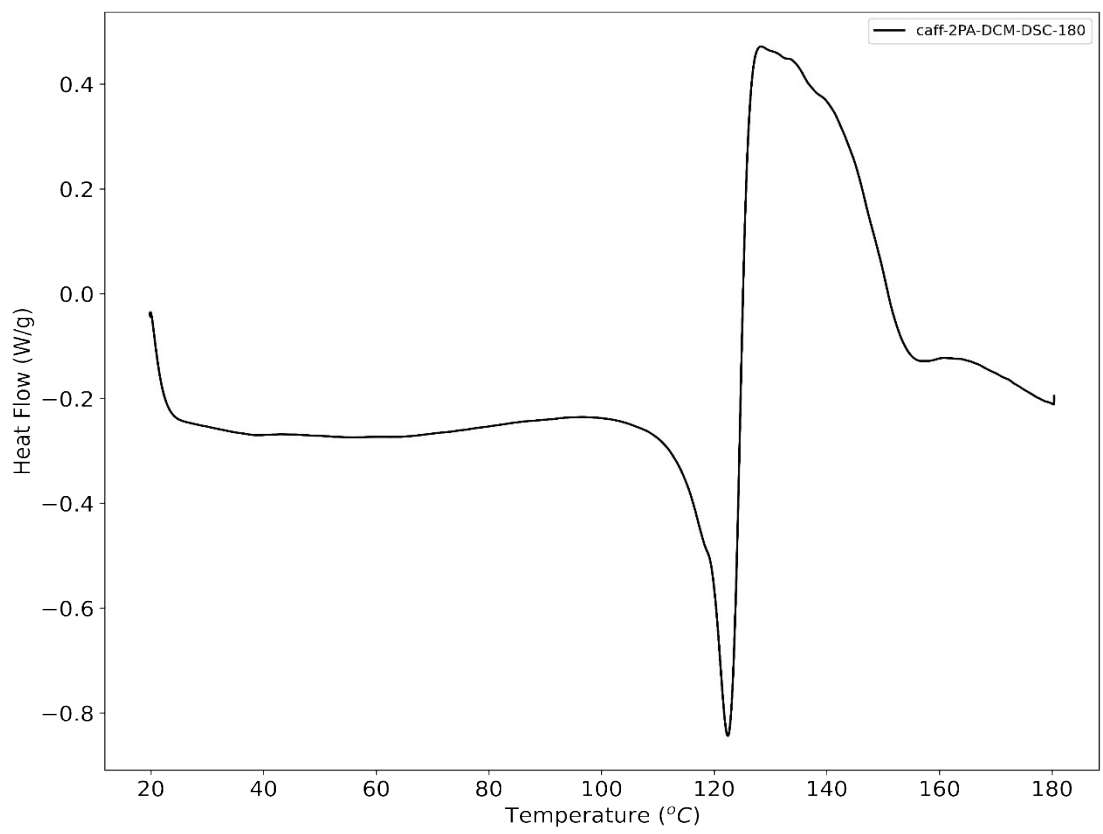

Figure S8. DSC thermogram of Caff-PA-DCM co-crystal.



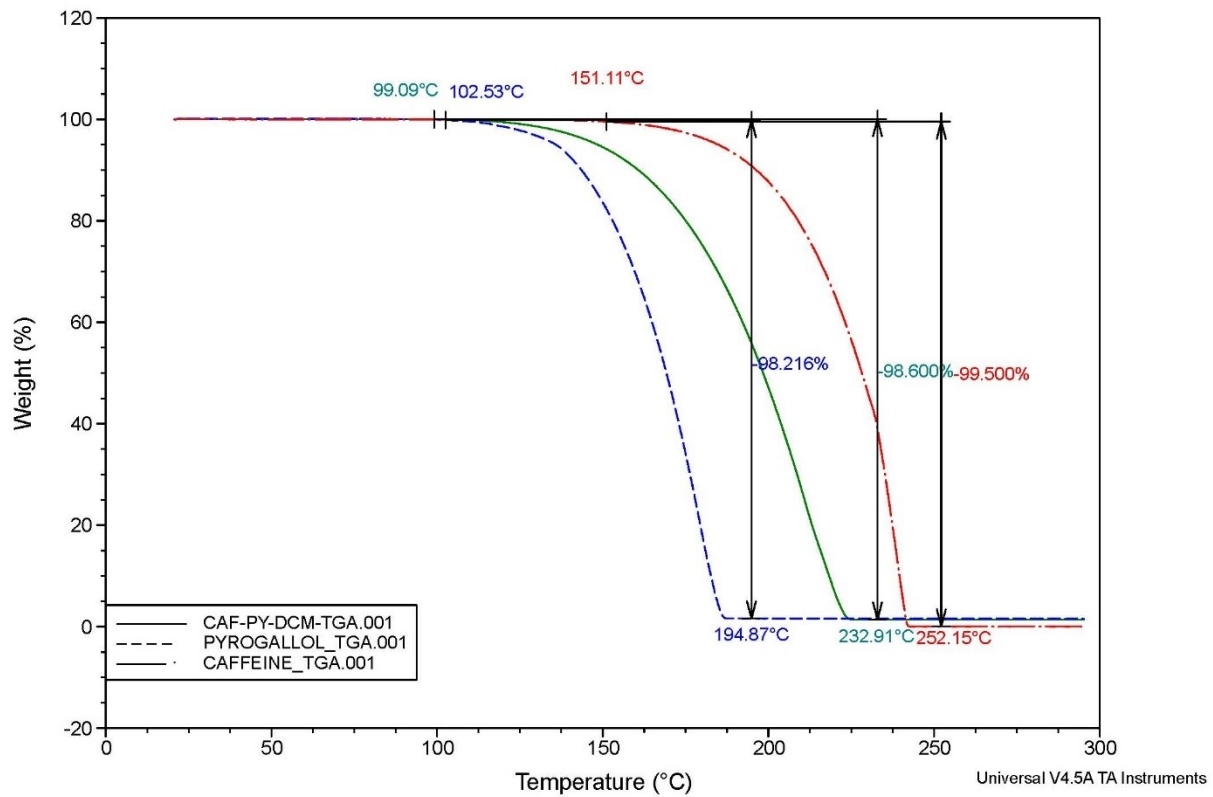

Figure S9. TGA (overlay) of caffeine, pyrogallol, and Caff-Py-DCM co-crystal. Color scheme: caffeine (red), pyrogallol (blue), and Caff-Py co-crystal (green).

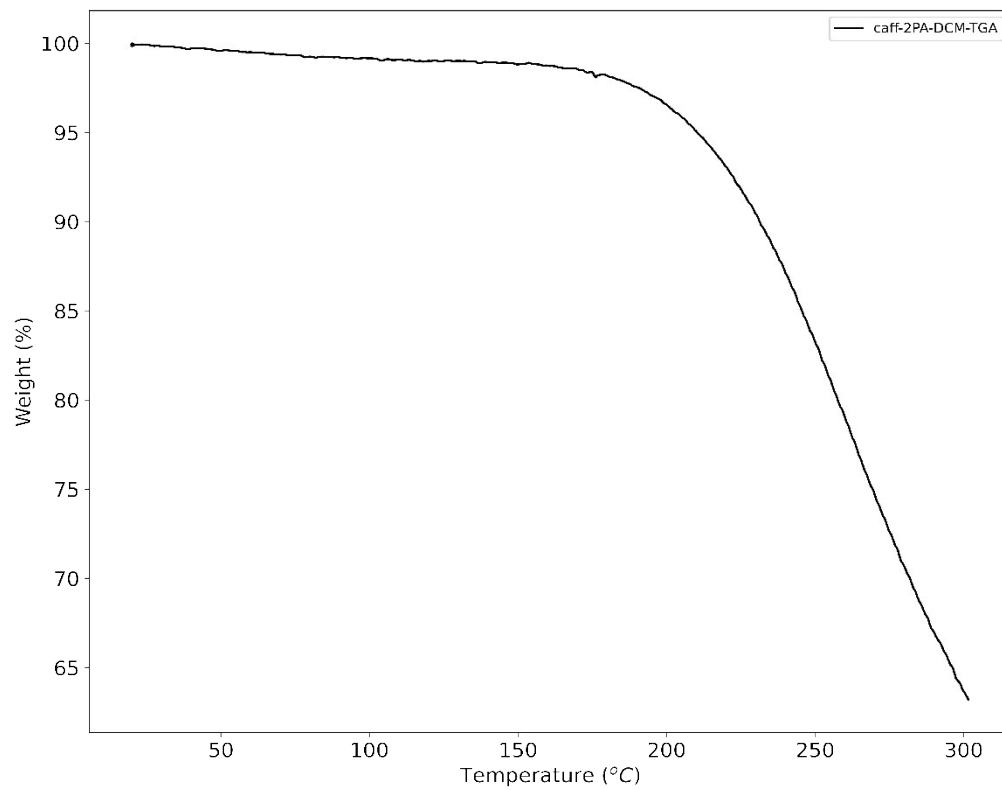

Figure S10. TGA of Caff-PA-DCM co-crystal.

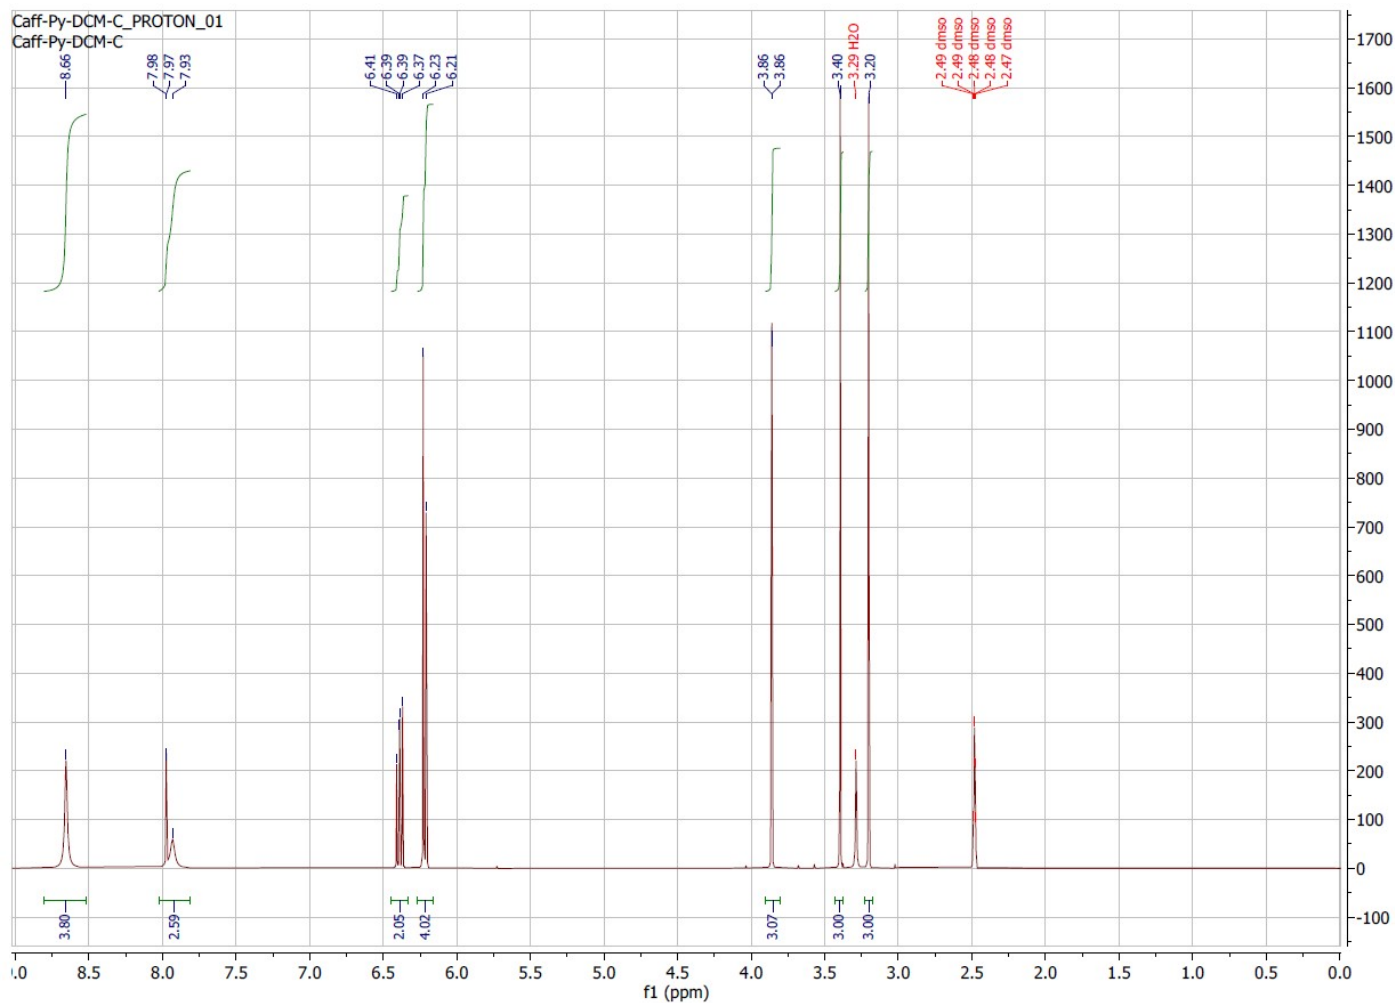

Figure S11. <sup>1</sup>H NMR spectrum of Caff-Py-DCM co-crystal collected in deuterated DMSO.

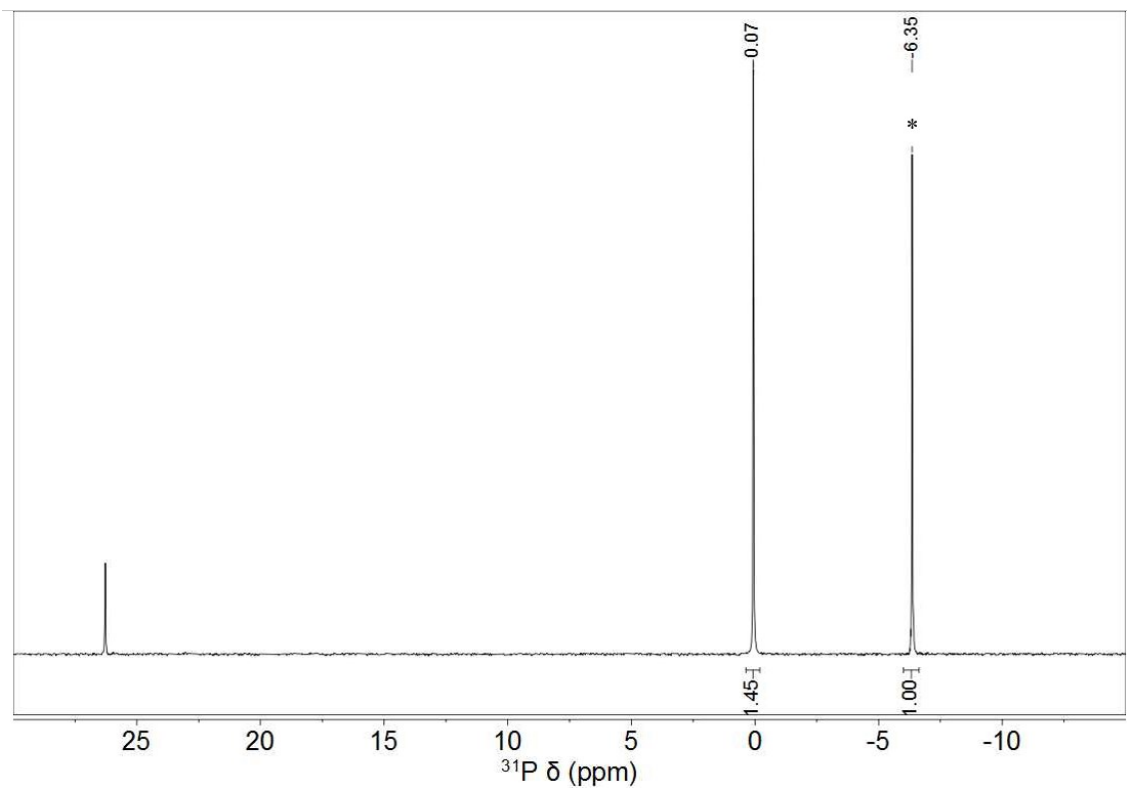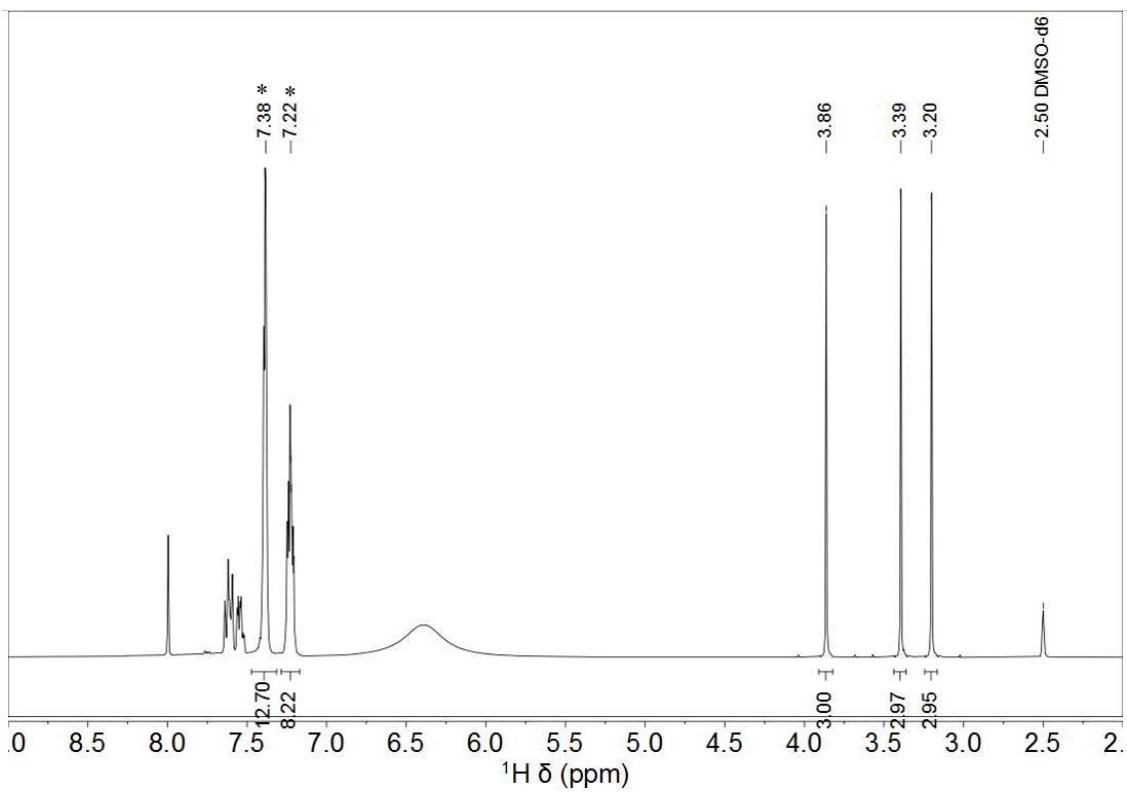

Figure S12.  $^{31}\text{P}$  NMR (top) and  $^1\text{H}$  NMR (bottom) spectra of Caff-PA-DCM co-crystal collected in deuterated DMSO with triphenylphosphine added as  $^1\text{H}/^{31}\text{P}$  relative integration standard. The \* marked peaks correspond to the internal integration standard, triphenylphosphine.

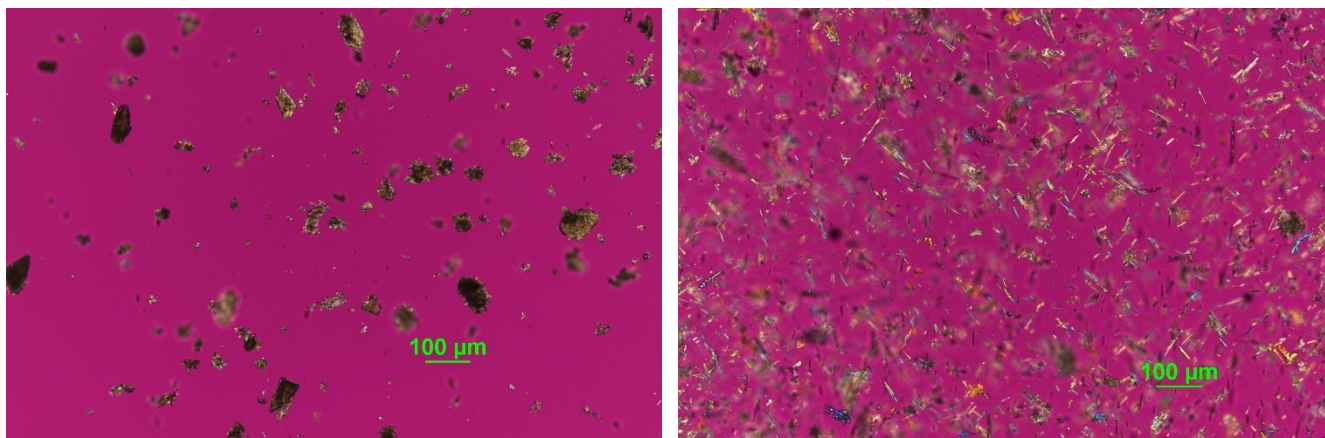

Figure S13. Polarized light microscopy of (a) caffeine and (b) Caff-Py-DCM co-crystal.

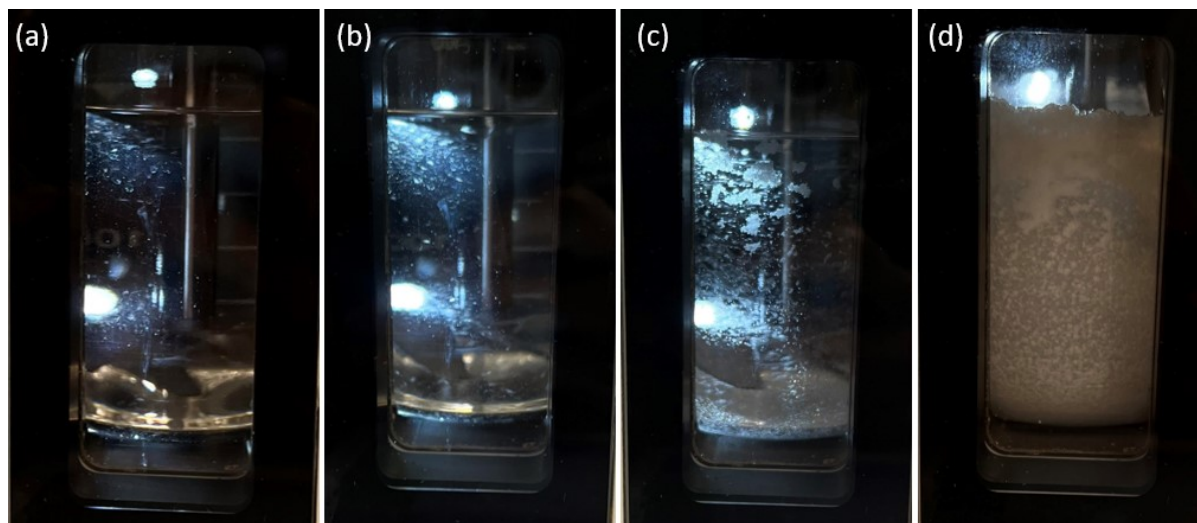

Figure S14. Visualization of Caff-Py-DCM co-crystal scale-up process by EasyMax402 at (a)  $t=0$ , (b)  $t=30$  min, (c)  $t=120$  min, and (d)  $t=24$  h.

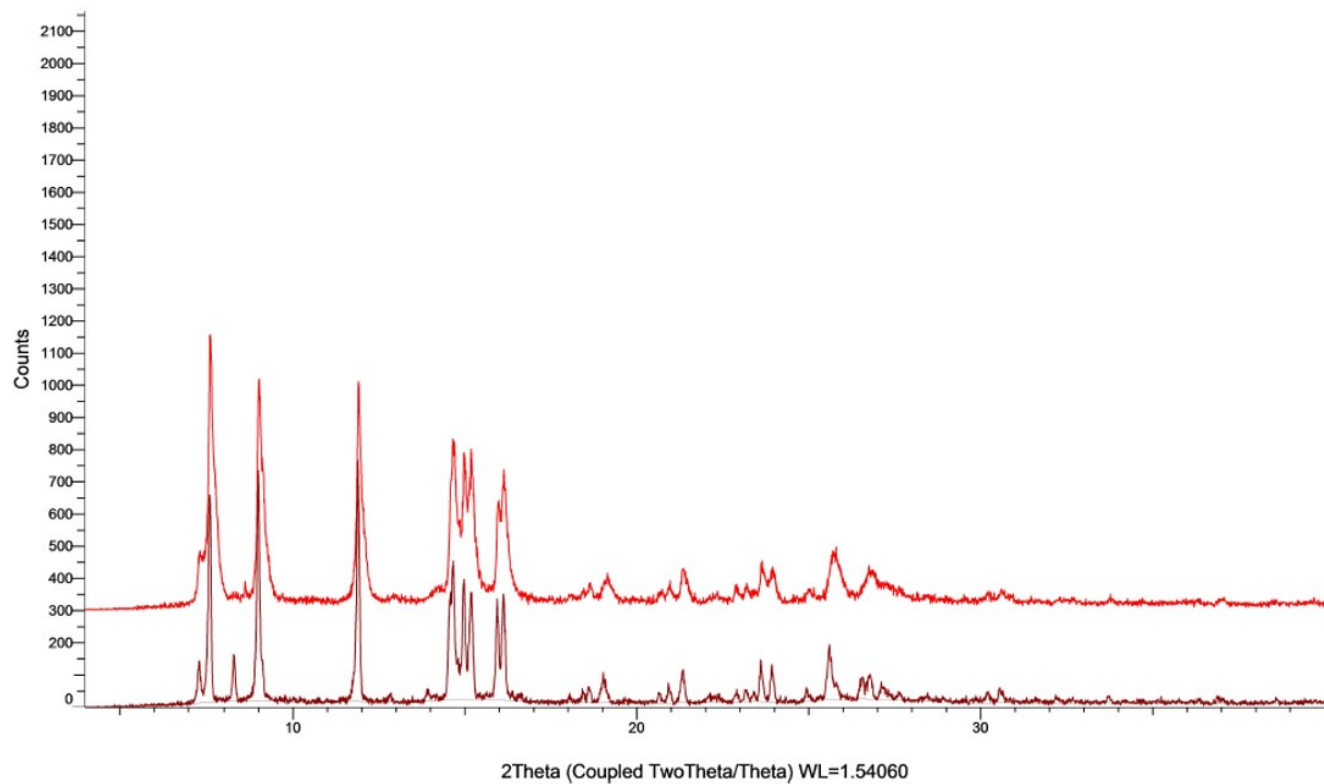

Figure S15. PXRD patterns of Caff-Py-DCM co-crystal (red) and Caff-Py-DCM scale-up (brown).

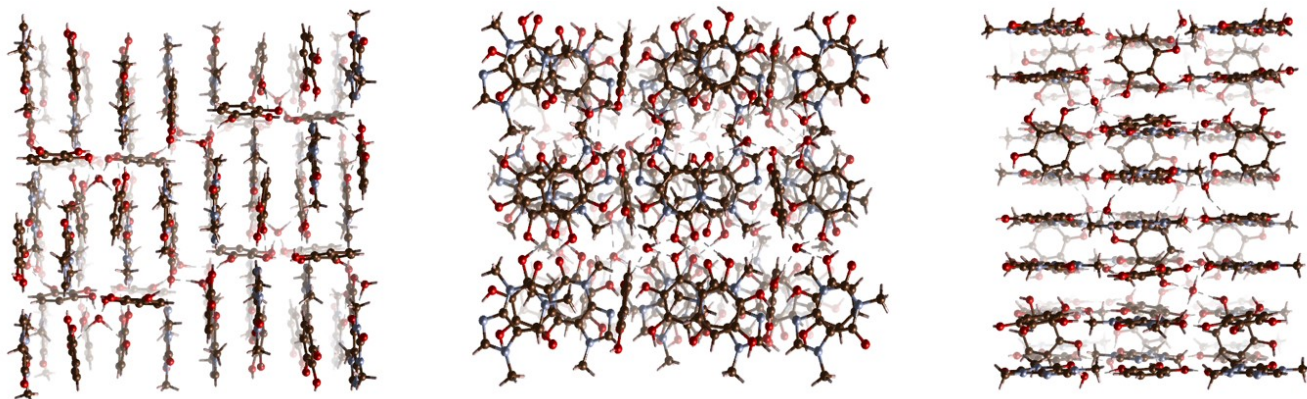

Figure S16. The crystal packing of Caff-Py co-crystal view along the *a*, *b*, and *c* axis, respectively. Color scheme: oxygen (red), carbon (brown), nitrogen (light blue), and hydrogen (white).

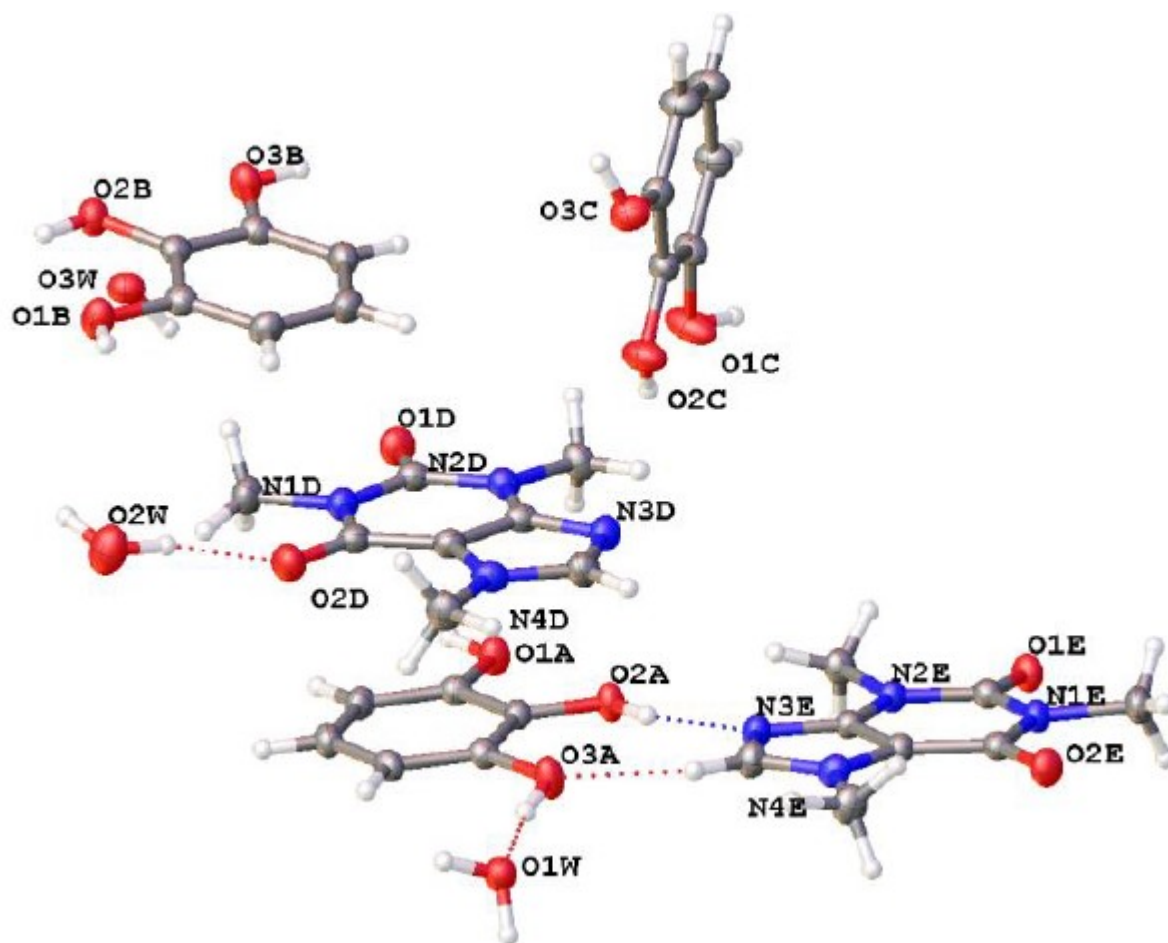

Figure S17. Asymmetric unit cell of Caff-Py co-crystal comprising two caffeine, three pyrogallol, and 2.5 water molecules. Color scheme: oxygen (red), carbon (gray), nitrogen (blue), and hydrogen (white).

Table S8. Crystallographic data for Caff-Py co-crystal.

|                                          |                                                                  |
|------------------------------------------|------------------------------------------------------------------|
| Formula                                  | C <sub>34</sub> H <sub>43</sub> N <sub>8</sub> O <sub>15.5</sub> |
| D <sub>calc.</sub> (g cm <sup>-3</sup> ) | 1.464                                                            |
| μ/mm <sup>-1</sup>                       | 0.997                                                            |
| Formula weight                           | 811.76                                                           |
| Colour                                   | Colourless                                                       |
| Shape                                    | Plate-shaped                                                     |
| Size(mm <sup>3</sup> )                   | 0.14 × 0.09 × 0.02                                               |
| T(K)                                     | 100.00 (10)                                                      |
| Crystal System                           | Orthorhombic                                                     |
| Space Group                              | Pccn                                                             |
| a, b, c (Å)                              | 13.97060 (16), 26.3924 (3), 19.9773(3)                           |
| α, β, γ (°)                              | 90                                                               |
| V/Å <sup>3</sup>                         | 7365.95(15)                                                      |
| Z, Z'                                    | 8, 1                                                             |
| Wavelength (Å)                           | 1.54184                                                          |
| Radiation type                           | Cu K <sub>α</sub>                                                |
| Θ <sub>min</sub> , Θ <sub>max</sub> (°)  | 3.349, 80.452                                                    |
| Measured Refl's.                         | 41596                                                            |
| Indep't Refl's                           | 7897                                                             |
| Refl's I> 2 σ (I)                        | 6403                                                             |
| R <sub>int</sub>                         | 0.0475                                                           |
| Parameters                               | 581                                                              |
| Restraints                               | 0                                                                |
| Largest Peak                             | 0.504                                                            |
| Deepest Hole                             | -0.262                                                           |
| GooF                                     | 1.033                                                            |
| wR <sub>2</sub> (all data)               | 0.1203                                                           |
| WR <sub>2</sub>                          | 0.1127                                                           |
| R <sub>1</sub> (all data)                | 0.0533                                                           |
| R <sub>1</sub>                           | 0.0433                                                           |



TableS9. Hydrogen Bond information for Caff-Py co-crystal.

| D   | H    | A                | d(D-H)(Å) | d(H-A)(Å) | d(D-A)(Å)  | D-H-A(°)  |
|-----|------|------------------|-----------|-----------|------------|-----------|
| C3D | H3D  | O1B <sup>1</sup> | 0.95      | 2.45      | 3.005(2)   | 117.2     |
| C3E | H3E  | O3A              | 0.95      | 2.38      | 2.998(2)   | 122.4     |
| O1A | H1A  | O1E <sup>2</sup> | 0.90(3)   | 1.80(3)   | 2.7029(16) | 177(2)    |
| O2A | H2A  | N3E              | 0.90(3)   | 1.93(3)   | 2.7858(18) | 160(3)    |
| O3A | H3A  | O1W              | 0.89(2)   | 1.82(2)   | 2.6909(17) | 167(2)    |
| O1B | H1B  | O2W <sup>3</sup> | 0.96(3)   | 1.66(3)   | 2.5989(18) | 167(3)    |
| O2B | H2B  | N3D <sup>4</sup> | 0.89(3)   | 2.02(3)   | 2.8881(19) | 163(2)    |
| O2B | H2B  | O1B              | 0.89(3)   | 2.29(2)   | 2.7094(17) | 108.3(19) |
| O3B | H3B  | O1D <sup>5</sup> | 0.87(3)   | 1.78(3)   | 2.6411(17) | 176(3)    |
| O1C | H1C  | O3W1             | 0.90(3)   | 1.79(3)   | 2.6889(17) | 172(3)    |
| O2C | H2C  | O1C              | 0.87(3)   | 2.11(3)   | 2.6409(18) | 119(3)    |
| O3C | H3C  | O1W <sup>3</sup> | 0.89(3)   | 1.90(3)   | 2.7554(18) | 160(3)    |
| O1W | H1WA | O2E <sup>6</sup> | 0.90(3)   | 1.82(3)   | 2.7159(17) | 172(2)    |
| O1W | H1WB | O2A <sup>7</sup> | 0.88(3)   | 2.03(3)   | 2.8516(17) | 155(3)    |
| O2W | H2WA | O2C <sup>4</sup> | 0.93(3)   | 1.99(3)   | 2.903(2)   | 165(3)    |
| O2W | H2WB | O2D              | 0.91(3)   | 1.82(3)   | 2.706(2)   | 164(3)    |
| O3W | H3W  | O3B <sup>5</sup> | 0.92(3)   | 1.86(3)   | 2.7688(17) | 175(3)    |

<sup>1</sup>+x,1/2-y,-1/2+z; <sup>2</sup>3/2-x,+y,1/2+z; <sup>3</sup>1/2-x,1/2-y,+z; <sup>4</sup>+x,1/2-y,1/2+z; <sup>5</sup>3/2-x,1/2-y,+z; <sup>6</sup>1/2-x,+y,1/2+z;  
<sup>7</sup>-1/2+x,1-y,1/2-z

In COSMO-RS, the estimation of molecular interactions involves analyzing the local contacts of COSMO surfaces and the polarization charge densities;  $\sigma$  and  $\sigma'$  quantify the interactions between two surface segments of the COSMO surfaces<sup>4</sup>. The  $\sigma$ -profile is divided into three parts: H-bond donor ( $\sigma < -0.0084$ ), hydrophobic ( $-0.0084 < \sigma < +0.0084$ ), H-bond acceptor ( $\sigma > +0.0084$ ) regions. The hydrogen atom bound to the imidazole ring has an acidic character, therefore, caffeine acts as a donor in pair formation with proton-accepting molecules. While in the presence of proton-donating molecules, caffeine acts as a hydrogen bond acceptor compound through the basic center of the nitrogen atom in the imidazole ring<sup>48, 49</sup>.

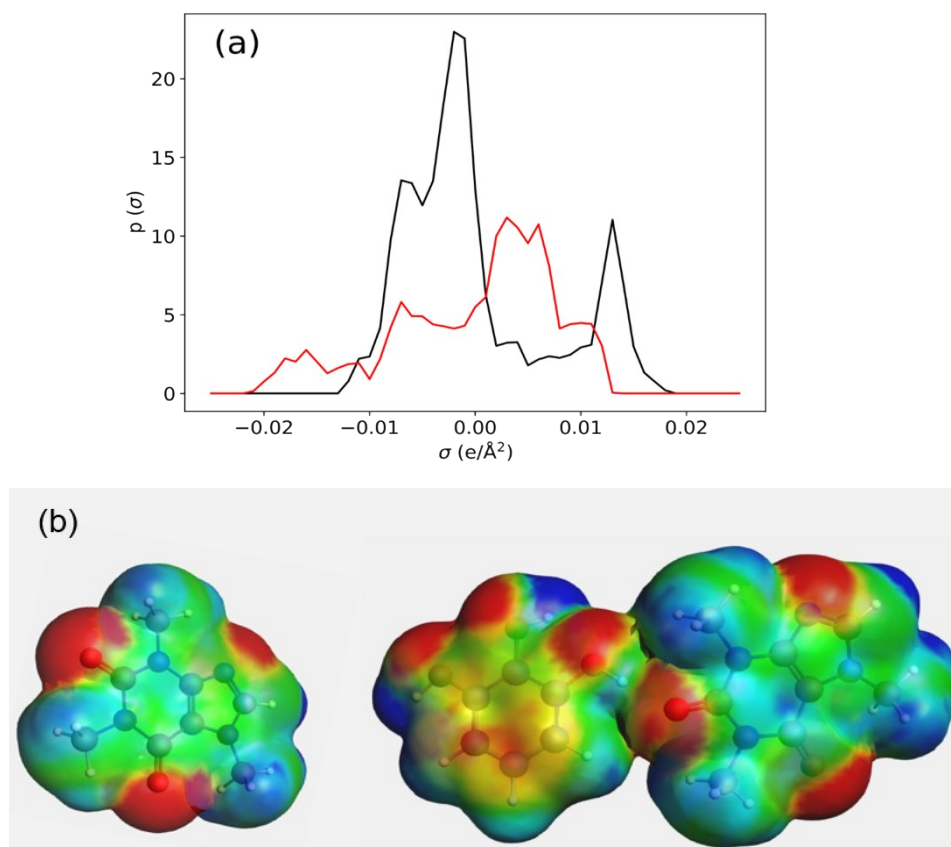

Figure S18. (a)  $\sigma$ -profile characteristics of caffeine (black) and pyrogallol (red) and (b) caffeine and caffeine-pyrogallol COSMO surfaces; the red part represents positive COSMO charge density (the underlying molecular charge is negative), and the blue part, negative COSMO charge density (the underlying molecular charge is

## References:

- (1) Cook, D.; Regnier, Z. R. The Infrared spectra of Caffeine salts. *Can. J. Chem.* **1967**, *45* (23), 2895-2897.
- (2) Klamt, A. Conductor-like screening model for real solvents: a new approach to the quantitative calculation of solvation phenomena. *J. Phys. Chem.* **1995**, *99* (7), 2224-2235.
- (3) Klamt, A.; Smith, B. J. Challenge of drug solubility prediction. *Methods Princ. Med. Chem.* **2008**.
- (4) Loschen, C.; Klamt, A. Solubility prediction, solvate and cocrystal screening as tools for rational crystal engineering. *J. Pharm. Pharmacol.* **2015**, *67* (6), 803-811.
- (5) Abramov, Y. A.; Loschen, C.; Klamt, A. Rational coformer or solvent selection for pharmaceutical cocrystallization or desolvation. *J. Pharm. Sci.* **2012**, *101* (10), 3687-3697.
- (6) LeCun, Y.; Bengio, Y.; Hinton, G. Deep learning. *nature* **2015**, *521* (7553), 436-444.
- (7) Bucar, D.-K.; Henry, R. F.; Lou, X.; Duerst, R. W.; MacGillivray, L. R.; Zhang, G. G. Cocrystals of caffeine and hydroxybenzoic acids composed of multiple supramolecular heterosynthons: Screening via solution-mediated phase transformation and structural characterization. *Cryst. Growth Des.* **2009**, *9* (4), 1932-1943.
- (8) Wicker, J. G.; Crowley, L. M.; Robshaw, O.; Little, E. J.; Stokes, S. P.; Cooper, R. I.; Lawrence, S. E. Will they co-crystallize? *CrystEngComm* **2017**, *19* (36), 5336-5340.
- (9) Trask, A. V.; van de Streek, J.; Motherwell, W. S.; Jones, W. Achieving polymorphic and stoichiometric diversity in cocrystal formation: Importance of solid-state grinding, powder X-ray structure determination, and seeding. *Cryst. Growth Des.* **2005**, *5* (6), 2233-2241.
- (10) Bučar, D.-K.; Henry, R. F.; Lou, X.; Borchardt, T. B.; Zhang, G. G. A "hidden" co-crystal of caffeine and adipic acid. *Chem. Commun.* **2007**, (5), 525-527.
- (11) Bučar, D.-K.; Day, G. M.; Halasz, I.; Zhang, G. G.; Sander, J. R.; Reid, D. G.; MacGillivray, L. R.; Duer, M. J.; Jones, W. The curious case of (caffeine)·(benzoic acid): how heteronuclear seeding allowed the formation of an elusive cocrystal. *Chem. Sci.* **2013**, *4* (12), 4417-4425.
- (12) Satyanarayana, C.; Damarla, S.; Gorantla, S.; Muppidi, V. Novel caffeine co-crystals and their polymorphic forms. *WO* **2017**, *9813*, A1.
- (13) Syed, T. A.; Ansari, K. B.; Banerjee, A.; Wood, D. A.; Khan, M. S.; Al Mesfer, M. K. Machine-learning predictions of caffeine co-crystal formation accompanying experimental and molecular validations. *J. Food Process Eng.* **2023**, *46* (2), e14230.
- (14) Kumar, G. S.; Seethalakshmi, P.; Bhuvanesh, N.; Kumaresan, S. Studies on the syntheses, structural characterization, antimicrobial-, and DPPH radical scavenging activity of the cocrystals caffeine: cinnamic acid and caffeine: eosin dihydrate. *J. Mol. Struct.* **2013**, *1050*, 88-96.
- (15) Karki, S.; Friščić, T.; Jones, W.; Motherwell, W. S. Screening for pharmaceutical cocrystal hydrates via neat and liquid-assisted grinding. *Mol. Pharmaceutics* **2007**, *4* (3), 347-354.
- (16) Clarke, H. D.; Arora, K. K.; Bass, H.; Kavuru, P.; Ong, T. T.; Pujari, T.; Wojtas, L.; Zaworotko, M. J. Structure-stability relationships in cocrystal hydrates: Does the promiscuity of water make crystalline hydrates the nemesis of crystal engineering? *Cryst. Growth Des.* **2010**, *10* (5), 2152-2167.
- (17) Trask, A. V.; Motherwell, W. S.; Jones, W. Solvent-drop grinding: green polymorph control of cocrystallisation. *Chem. Commun.* **2004**, (7), 890-891.
- (18) Alvarez-Lorenzo, C.; Castiñeiras, A.; Frontera, A.; García-Santos, I.; González-Pérez, J.; Niclós-Gutiérrez, J.; Rodríguez-González, I.; Vílchez-Rodríguez, E.; Zareba, J. Recurrent motifs in pharmaceutical cocrystals involving glycolic acid: X-ray characterization, Hirshfeld surface analysis and DFT calculations. *CrystEngComm* **2020**, *22* (40), 6674-6689.

- (19) Friščić, T.; Fábián, L.; Burley, J. C.; Jones, W.; Motherwell, W. S. Exploring cocrystal–cocrystal reactivity via liquid-assisted grinding: the assembling of racemic and dismantling of enantiomeric cocrystals. *Chem. Commun.* **2006**, (48), 5009-5011.
- (20) Trask, A. V.; Motherwell, W. S.; Jones, W. Pharmaceutical cocrystallization: engineering a remedy for caffeine hydration. *Cryst. Growth Des.* **2005**, 5 (3), 1013-1021.
- (21) Leysens, T.; Tumanova, N.; Robeyns, K.; Candoni, N.; Veessler, S. Solution cocrystallization, an effective tool to explore the variety of cocrystal systems: caffeine/dicarboxylic acid cocrystals. *CrystEngComm* **2014**, 16 (41), 9603-9611.
- (22) Cui, W.; He, Z.; Zhang, Y.; Fan, Q.; Feng, N. Naringenin cocrystals prepared by solution crystallization method for improving bioavailability and anti-hyperlipidemia effects. *AAPS PharmSciTech* **2019**, 20 (3), 1-12.
- (23) Schultheiss, N.; Bethune, S.; Henck, J.-O. Nutraceutical cocrystals: utilizing pterostilbene as a cocrystal former. *CrystEngComm* **2010**, 12 (8), 2436-2442.
- (24) Smith, A. J.; Kavuru, P.; Wojtas, L.; Zaworotko, M. J.; Shytle, R. D. Cocrystals of quercetin with improved solubility and oral bioavailability. *Mol. Pharmaceutics* **2011**, 8 (5), 1867-1876.
- (25) Padrela, L.; Rodrigues, M. A.; Velaga, S. P.; Fernandes, A. C.; Matos, H. A.; de Azevedo, E. G. Screening for pharmaceutical cocrystals using the supercritical fluid enhanced atomization process. *J. Supercrit. Fluids* **2010**, 53 (1-3), 156-164.
- (26) Friscic, T.; Trask, A. V.; Motherwell, W.; Jones, W. Guest-directed assembly of caffeine and succinic acid into topologically different heteromolecular host networks upon grinding. *Cryst. Growth Des.* **2008**, 8 (5), 1605-1609.
- (27) Eddleston, M. D.; Patel, B.; Day, G. M.; Jones, W. Cocrystallization by freeze-drying: preparation of novel multicomponent crystal forms. *Cryst. Growth Des.* **2013**, 13 (10), 4599-4606.
- (28) MacFhionnghaile, P.; Crowley, C. M.; McArdle, P.; Erxleben, A. Spontaneous solid-state cocrystallization of caffeine and urea. *Cryst. Growth Des.* **2020**, 20 (2), 736-745.
- (29) Jacobs, A.; Noa, F. M. A. Co-crystals and co-crystal hydrates of vanillic acid. *CrystEngComm* **2015**, 17 (1), 98-106.
- (30) Bučar, D.-K.; Henry, R. F.; Duerst, R. W.; Lou, X.; MacGillivray, L. R.; Zhang, G. G. A 1: 1 cocrystal of caffeine and 2-hydroxy-1-naphthoic acid obtained via a slurry screening method. *J. Chem. Crystallogr.* **2010**, 40 (11), 933-939.
- (31) Kumar, G. S.; Seethalakshmi, P.; Sumathi, D.; Bhuvanesh, N.; Kumaresan, S. Syntheses, structural characterization, and DPPH radical scavenging activity of cocrystals of caffeine with 1-and 2-naphthoxyacetic acids. *J. Mol. Struct.* **2013**, 1035, 476-482.
- (32) Ghosh, S.; Reddy, C. M. Co-crystals of caffeine with substituted nitroanilines and nitrobenzoic acids: Structure–mechanical property and thermal studies. *CrystEngComm* **2012**, 14 (7), 2444-2453.
- (33) Shefter, E. Structural studies on complexes II. Crystal and molecular structure of a 1: 1 caffeine and 5-chlorosalicylic acid complex. *J. Pharm. Sci.* **1968**, 57 (7), 1163-1168.
- (34) Zaworotko, M. J.; Clarke, H.; Kapildev, A.; Kavuru, P.; Shytle, R. D.; Pujari, T.; Marshall, L.; Ong, T. T. Nutraceutical co-crystal compositions. **2019**.
- (35) Mukherjee, S. *Crystal engineering of pharmaceutical cocrystals*; University of South Florida, 2011.
- (36) Todaro, V.; Worku, Z. A.; Cabral, L. M.; Healy, A. M. In situ cocrystallization of dapsone and caffeine during fluidized bed granulation processing. *AAPS PharmSciTech* **2019**, 20, 1-13.
- (37) Craven, B.; Gartland, G. The 2: 1 crystal complex of 5, 5-diethylbarbituric acid (barbital) and caffeine. *Acta Crystallographica Section B: Structural Crystallography and Crystal Chemistry* **1974**, 30 (5), 1191-1195.
- (38) Goud, N. R.; Gangavaram, S.; Suresh, K.; Pal, S.; Manjunatha, S. G.; Nambiar, S.; Nangia, A. Novel furosemide cocrystals and selection of high solubility drug forms. *J. Pharm. Sci.* **2012**, 101 (2), 664-680.
- (39) Chadha, K.; Karan, M.; Bhalla, Y.; Chadha, R.; Khullar, S.; Mandal, S.; Vasisht, K. Cocrystals of hesperetin: structural, pharmacokinetic, and pharmacodynamic evaluation. *Cryst. Growth Des.* **2017**, 17 (5), 2386-2405.
- (40) Lekšić, E.; Pavlović, G.; Mestrovic, E. Cocrystals of lamotrigine based on cofomers involving carbonyl group discovered by hot-stage microscopy and DSC screening. *Cryst. Growth Des.* **2012**, 12 (4), 1847-1858.

- (41) Sun, C. C.; Hou, H. Improving mechanical properties of caffeine and methyl gallate crystals by cocrystallization. *Cryst. Growth Des.* **2008**, *8* (5), 1575-1579.
- (42) Sanphui, P.; Kumar, S. S.; Nangia, A. Pharmaceutical cocrystals of niclosamide. *Cryst. Growth Des.* **2012**, *12* (9), 4588-4599.
- (43) Kumar, G. S.; Seethalakshmi, P.; Bhuvanesh, N.; Kumaresan, S. Cocrystals of caffeine with formylphenoxyaliphatic acids: Syntheses, structural characterization, and biological activity. *J. Mol. Struct.* **2013**, *1034*, 302-309.
- (44) Schultheiss, N.; Roe, M.; Boerrigter, S. X. Cocrystals of nutraceutical p-coumaric acid with caffeine and theophylline: polymorphism and solid-state stability explored in detail using their crystal graphs. *CrystEngComm* **2011**, *13* (2), 611-619.
- (45) Maninder, K.; Kunal, C.; Renu, C.; Anupam, S. Cocrystal of caffeine with propionic acid: preliminary characterization and stability evaluation. *Journal of Pharmacy Research* **2012**, *5* (4), 2022-2026.
- (46) Leger, J.-M.; Alberola, S.; Carpy, A. Structure cristalline du complexe 1: 1 sulfacétamide–caféine. *Acta Crystallographica Section B: Structural Crystallography and Crystal Chemistry* **1977**, *33* (5), 1455-1459.
- (47) Ghosh, M.; Basak, A.; Mazumdar, S.; Sheldrick, B. Structure and conformation of the 1: 1 molecular complex sulfaproxyline–caffeine. *Acta Crystallographica Section C: Crystal Structure Communications* **1991**, *47* (3), 577-580.
- (48) Jeliński, T.; Kubsik, M.; Cysewski, P. Application of the Solute–Solvent Intermolecular Interactions as Indicator of Caffeine Solubility in Aqueous Binary Aprotic and Proton Acceptor Solvents: Measurements and Quantum Chemistry Computations. *Materials* **2022**, *15* (7), 2472.
- (49) Jeliński, T.; Cysewski, P. Quantification of Caffeine Interactions in Choline Chloride Natural Deep Eutectic Solvents: Solubility Measurements and COSMO-RS-DARE Interpretation. *Int. J. Mol. Sci.* **2022**, *23* (14), 7832.
