# Supplementary material for: Computational screening for prediction of co-crystals: method comparison and experimental validation
Source: Royal Society of Chemistry journal article supplement (doi:10.1039/d3ce01252b), 2024-01-01
Supplement: d3ce01252b2.xlsx [file d3ce01252b2.xlsx]

## Sheet: Sheet1
Independent Test Set		Descriptors
Coformer	Smiles	ABC	ABCGG	nAcid	nBase	SpAbs_A	SpMax_A	SpDiam_A	SpAD_A	SpMAD_A	LogEE_A	VE1_A	VE2_A	VE3_A	VR1_A	VR2_A	VR3_A	nAromAtom	nAromBond	nAtom	nHeavyAtom	nSpiro	nBridgehead	nHetero	nH	nB	nC	nN	nO	nS	nP	nF	nCl	nBr	nI	nX	ATS0dv	ATS1dv	ATS2dv	ATS3dv	ATS4dv	ATS5dv	ATS6dv	ATS7dv	ATS8dv	ATS0d	ATS1d	ATS2d	ATS3d
Pyrogallol	OC1=C(O)C=CC=C1O	6.61125	6.41989	0	0	10.8913	2.26382	4.52764	10.8913	1.21015	3.0999	2.8501	0.316678	0.941994	26.6231	2.95812	3.17642	6	6	15	9	0	0	3	6	0	6	0	3	0	0	0	0	0	0	0	150	134	183	186	70	0	0	0	0	48	56	76	70
Resorcinol	OC1=CC=CC(O)=C1	5.87563	5.56604	0	0	9.43115	2.17533	4.35066	9.43115	1.17889	2.97974	2.73673	0.342092	0.783622	22.2878	2.78598	2.8809	6	6	14	8	0	0	2	6	0	6	0	2	0	0	0	0	0	0	0	118	106	127	103	55	0	0	0	0	42	48	67	58
PhosphoricAcid	O=P(O)(O)O	3.4641	3.4641	3	0	4	2	4	4	0.8	2.44447	2.12132	0.424264	0.0588915	8	1.6	1.38629	0	0	8	5	0	0	5	3	0	0	0	4	0	1	0	0	0	0	0	111.309	11.6667	165	0	0	0	0	0	0	23	19	18	9
DCM	C(Cl)Cl	1.41421	1.41421	0	0	2.82843	1.41421	2.82843	2.82843	0.942809	1.84946	1.70711	0.569036	-0.669173	3.36359	1.1212	0.00903476	0	0	5	3	0	0	2	2	0	1	0	0	0	0	0	2	0	0	2	5.20988	3.11111	0.604938	0	0	0	0	0	0	8	8	6	0
Chloroform (trichloromethane)	C(Cl)(Cl)Cl	2.44949	2.44949	0	0	3.4641	1.73205	3.4641	3.4641	0.866025	2.17806	1.93185	0.482963	-0.257812	5.58363	1.39591	0.803548	0	0	5	4	0	0	3	1	0	1	0	0	0	0	0	3	0	0	3	10.8148	7	1.81481	0	0	0	0	0	0	13	12	6	0
Gallic acid	O=C(O)C1=CC(O)=C(O)C(O)=C1	8.91091	8.56808	1	0	14.0829	2.34292	4.68585	14.0829	1.17357	3.38342	3.20159	0.266799	1.34597	42.8158	3.56798	3.93923	6	6	18	12	0	0	5	6	0	7	0	5	0	0	0	0	0	0	0	234	200	289	298	219	174	55	0	0	64	74	102	103
Catechin	OC(C=C1)=C(O)C=C1[C@@H]2[C@@H](O)CC3=C(O)C=C(O)C=C3O2	16.6082	13.3379	0	0	26.6995	2.46435	4.9287	26.6995	1.27141	3.98729	4.13265	0.196793	2.16086	126.862	6.04104	5.58504	12	12	35	21	0	0	6	14	0	15	0	6	0	0	0	0	0	0	0	340	325	474	543	462	363	328	277	198	128	161	253	285
Citric Acid	OC(CC(O)(C(O)=O)CC(O)=O)=O	9.23893	9.62412	3	0	13.3339	2.32685	4.65369	13.3339	1.02568	3.41614	3.13303	0.241002	1.40436	49.5968	3.81514	4.16629	0	0	21	13	0	0	7	8	0	6	0	7	0	0	0	0	0	0	0	280	200	270	275	346	330	121	0	0	66	74	109	112
Oxalic acid	OC(C(O)=O)=O	3.93265	4.24438	2	0	6	2	4	6	1	2.61085	2.3094	0.3849	0.326163	11.53	1.92167	1.93413	0	0	8	6	0	0	4	2	0	2	0	4	0	0	0	0	0	0	0	154	104	148	121	0	0	0	0	0	24	23	20	12
Quercetin	OC1=C(O)C=C(C2=C(O)C(C3=C(O)C=C(O)C=C3O2)=O)C=C1	17.3438	14.2077	0	0	27.6871	2.49907	4.99813	27.6871	1.2585	4.03287	4.13796	0.188089	2.20866	144.992	6.59056	5.76514	16	17	32	22	0	0	7	10	0	15	0	7	0	0	0	0	0	0	0	402	389	587	715	643	478	428	341	228	130	160	242	264
Catechol	OC1=C(O)C=CC=C1	5.83519	5.60621	0	0	9.95396	2.19353	4.38705	9.95396	1.24424	2.98024	2.72191	0.340239	0.778191	22.4579	2.80724	2.8885	6	6	14	8	0	0	2	6	0	6	0	2	0	0	0	0	0	0	0	118	107	136	118	30	0	0	0	0	42	49	66	60
Malonic acid	OC(CC(O)=O)=O	4.6802	4.94248	2	0	6.82843	2	4	6.82843	0.97549	2.76511	2.5	0.357143	0.559616	15.3137	2.18767	2.37207	0	0	11	7	0	0	4	4	0	3	0	4	0	0	0	0	0	0	0	158	104	120	88	121	0	0	0	0	30	30	38	26
2,5-Dihydroxybenzoic acid	OC1=CC(C(O)=O)=C(O)C=C1	8.13485	7.80879	1	0	13.1326	2.30504	4.61008	13.1326	1.19387	3.29467	3.08912	0.280829	1.2232	37.1827	3.38024	3.71115	6	6	17	11	0	0	4	6	0	7	0	4	0	0	0	0	0	0	0	202	173	240	227	204	113	0	0	0	58	67	93	92
Naringenin	OC1=CC=C(C=C1)[C@@H]2CC(C3=C(O)C=C(O)C=C3O2)=O	15.8321	12.5961	0	0	25.1105	2.4631	4.9262	25.1105	1.25552	3.93975	3.96507	0.198253	2.07067	134.167	6.70837	5.59223	12	12	32	20	0	0	5	12	0	15	0	5	0	0	0	0	0	0	0	326	314	446	501	482	296	290	218	175	120	150	234	257
L-Tartaric acid	OC([C@H](O)[C@@H](O)C(O)=O)=O	6.89898	7.45697	2	0	10.8573	2.21432	4.42864	10.8573	1.08573	3.14308	2.88668	0.288668	1.06011	28.3015	2.83015	3.34292	0	0	16	10	0	0	6	6	0	4	0	6	0	0	0	0	0	0	0	222	151	220	257	198	121	0	0	0	48	55	70	67
salicylic acid	O=C(O)C1=CC=CC=C1O	7.31836	7.06919	1	0	11.9458	2.26718	4.53437	11.9458	1.19458	3.19767	2.96474	0.296474	1.08679	32.367	3.2367	3.47714	6	6	16	10	0	0	3	6	0	7	0	3	0	0	0	0	0	0	0	170	147	203	184	148	33	0	0	0	52	61	83	81
Malic acid	OC(CC(O)C(O)=O)=O	6.16336	6.5159	2	0	9.33533	2.11688	4.23377	9.33533	1.03726	3.02833	2.77452	0.308279	0.915116	24.0625	2.67361	3.07529	0	0	15	9	0	0	5	6	0	4	0	5	0	0	0	0	0	0	0	192	129	165	146	143	121	0	0	0	42	46	60	56
Caffeic acid	OC(/C=C/C1=CC(O)=C(O)C=C1)=O	9.58951	8.71557	1	0	15.6474	2.2742	4.5484	15.6474	1.20364	3.45053	3.2027	0.246361	1.42636	65.3445	5.0265	4.44204	6	6	21	13	0	0	4	8	0	9	0	4	0	0	0	0	0	0	0	220	190	248	215	151	136	128	119	55	68	78	107	109
Pterostilbene	OC1=CC=C(/C=C/C2=CC(OC)=CC(OC)=C2)C=C1	14.2515	11.7184	0	0	24.5088	2.30849	4.61698	24.5088	1.28993	3.84887	3.87782	0.204096	1.99713	114.379	6.01996	5.38137	12	12	35	19	0	0	3	16	0	16	0	3	0	0	0	0	0	0	0	260	251	311	302	255	188	182	190	164	108	128	194	205
Maleic acid	O=C(O)/C=C\C(O)=O	5.38731	5.58056	2	0	8.47214	2	4	8.47214	1.05902	2.89923	2.68328	0.33541	0.763897	19.3573	2.41966	2.73993	0	0	12	8	0	0	4	4	0	4	0	4	0	0	0	0	0	0	0	172	121	150	82	88	121	0	0	0	34	34	38	34
Adipic acid	OC(CCCCC(O)=O)=O	6.80152	6.72605	2	0	10.9879	2	4	10.9879	1.09879	3.12321	3.02372	0.302372	1.10649	28.1954	2.81954	3.33916	0	0	20	10	0	0	4	10	0	6	0	4	0	0	0	0	0	0	0	170	116	128	64	60	60	88	121	0	48	54	76	78
Urea	NC(N)=O	2.44949	2.44949	0	0	3.4641	1.73205	3.4641	3.4641	0.866025	2.17806	1.93185	0.482963	-0.257812	5.58363	1.39591	0.803548	0	0	8	4	0	0	3	4	0	1	2	1	0	0	0	0	0	0	0	70	48	45	0	0	0	0	0	0	16	13	17	8
Glycolic acid	OC(CO)=O	3.04721	3.30518	1	0	5.22625	1.84776	3.69552	5.22625	1.04525	2.40858	2.13099	0.426197	0.0634378	8.62987	1.72597	1.46208	0	0	9	5	0	0	3	4	0	2	0	3	0	0	0	0	0	0	0	106	62	72	55	0	0	0	0	0	20	20	22	14
Benzoicacid	O=C(O)C1=CC=CC=C1	6.5423	6.2361	1	0	11.19	2.19399	4.38799	11.19	1.24333	3.08977	2.85639	0.317376	0.944197	27.6091	3.06768	3.21279	6	6	15	9	0	0	2	6	0	7	0	2	0	0	0	0	0	0	0	138	120	158	120	78	33	0	0	0	46	54	72	70
Saccharin	O=C1NS(C2=CC=CC=C21)(=O)=O	9.47713	8.80633	0	0	14.8656	2.49158	4.7934	14.8656	1.2388	3.44437	3.19994	0.266662	1.34545	48.4021	4.03351	4.06186	6	6	17	12	0	0	5	5	0	7	1	3	1	0	0	0	0	0	0	208.444	136.333	313.333	263	218	54	0	0	0	71	89	132	116
Cinnamic acid	OC(/C=C/C1=CC=CC=C1)=O	7.99695	7.29864	1	0	13.6744	2.16645	4.33291	13.6744	1.24313	3.27794	3.07411	0.279464	1.21833	42.504	3.864	3.84491	6	6	19	11	0	0	2	8	0	9	0	2	0	0	0	0	0	0	0	156	137	165	115	95	99	78	33	0	56	65	88	89
Succinic acid	OC(CCC(O)=O)=O	5.38731	5.58056	2	0	8.47214	2	4	8.47214	1.05902	2.89923	2.68328	0.33541	0.763897	19.3573	2.41966	2.73993	0	0	14	8	0	0	4	6	0	4	0	4	0	0	0	0	0	0	0	162	108	120	60	88	121	0	0	0	36	38	50	47
Acetic acid	CC(O)=O	2.44949	2.44949	1	0	3.4641	1.73205	3.4641	3.4641	0.866025	2.17806	1.93185	0.482963	-0.257812	5.58363	1.39591	0.803548	0	0	8	4	0	0	2	4	0	2	0	2	0	0	0	0	0	0	0	78	48	41	0	0	0	0	0	0	16	13	18	8
Glutaric acid	OC(CCCC(O)=O)=O	6.09441	6.17209	2	0	9.4641	2	4	9.4641	1.05157	3.01748	2.85774	0.317526	0.94467	23.6544	2.62826	3.05819	0	0	17	9	0	0	4	8	0	5	0	4	0	0	0	0	0	0	0	166	112	124	60	60	88	121	0	0	42	46	63	62
theophylline	O=C(N(C)C(N1C)=O)C2=C1N=CN2	10.0944	9.75929	0	0	16.6424	2.47635	4.89056	16.6424	1.28018	3.51465	3.36366	0.258743	1.47539	51.3293	3.94841	4.20063	9	10	21	13	0	0	6	8	0	7	4	2	0	0	0	0	0	0	0	238	233	364	324	256	56	0	0	0	78	96	151	145
Vanillic acid	OC1=C(OC)C=C(C(O)=O)C=C1	8.73257	8.35576	1	0	14.4149	2.30932	4.61865	14.4149	1.20124	3.37614	3.19239	0.266033	1.34309	44.4247	3.70206	3.97612	6	6	20	12	0	0	4	8	0	8	0	4	0	0	0	0	0	0	0	214	183	252	240	167	137	66	0	0	64	74	105	107
4-toluamide	CC1=CC=C(C(N)=O)C=C1	7.3588	6.90974	0	0	11.9362	2.23607	4.47214	11.9362	1.19362	3.19724	2.99535	0.299535	1.09706	31.9769	3.19769	3.46501	6	6	19	10	0	0	2	9	0	8	1	1	0	0	0	0	0	0	0	130	122	150	118	74	40	9	0	0	55	63	94	91
Para-aminobenzoic acid	NC1=CC=C(C(O)=O)C=C1	7.3588	6.90974	1	0	11.9362	2.23607	4.47214	11.9362	1.19362	3.19724	2.99535	0.299535	1.09706	31.9769	3.19769	3.46501	6	6	17	10	0	0	3	7	0	7	1	2	0	0	0	0	0	0	0	154	138	182	142	94	56	33	0	0	53	61	85	83
Anthranilamide	NC1=CC=CC=C1C(N)=O	7.31836	7.06919	0	0	11.9458	2.26718	4.53437	11.9458	1.19458	3.19767	2.96474	0.296474	1.08679	32.367	3.2367	3.47714	6	6	18	10	0	0	3	8	0	7	2	1	0	0	0	0	0	0	0	138	131	169	150	102	27	0	0	0	54	63	91	90
Orcinol	OC1=CC(O)=CC(C)=C1	6.69213	6.35589	0	0	10.129	2.23607	4.47214	10.129	1.12544	3.09901	2.86791	0.318657	0.948224	26.5286	2.94763	3.17286	6	6	17	9	0	0	2	8	0	7	0	2	0	0	0	0	0	0	0	126	116	141	124	68	0	0	0	0	50	56	87	74
Aconitic acid	O=C(O)C/C(C(O)=O)=C/C(O)=O	8.39407	8.66455	3	0	12.6541	2.19399	4.38799	12.6541	1.0545	3.32197	3.11694	0.259745	1.31917	41.0092	3.41743	3.89612	0	0	18	12	0	0	6	6	0	6	0	6	0	0	0	0	0	0	0	260	188	247	195	247	330	121	0	0	56	60	79	81
Fumaric acid	OC(/C=C/C(O)=O)=O	5.38731	5.58056	2	0	8.47214	2	4	8.47214	1.05902	2.89923	2.68328	0.33541	0.763897	19.3573	2.41966	2.73993	0	0	12	8	0	0	4	4	0	4	0	4	0	0	0	0	0	0	0	172	121	150	82	88	121	0	0	0	34	34	38	34
Propyl gallate	OC1=C(O)C=C(C(OCCC)=O)C=C1O	10.9228	10.1813	0	0	18.2625	2.353	4.70601	18.2625	1.2175	3.59238	3.37296	0.224864	1.62126	99.53	6.63534	5.00592	6	6	27	15	0	0	5	12	0	10	0	5	0	0	0	0	0	0	0	254	222	321	338	263	226	110	46	24	82	97	140	147
Chloral hydrate	ClC(Cl)(C(O)O)Cl	4.87657	5.20985	0	0	6.60272	2.17533	4.35066	6.60272	0.943246	2.79278	2.45369	0.350527	0.540918	14.7303	2.10433	2.33323	0	0	10	7	0	0	5	3	0	2	0	2	0	0	0	3	0	0	3	76.8148	51.3333	73.8148	23.3333	0	0	0	0	0	33	35	33	21
d-10-Camphorsulfonic acid	CC1(C)[C@@]2(CS(=O)(O)=O)CCC1CC2=O	11.9997	11.8546	1	0	17.3399	2.64898	5.06996	17.3399	1.15599	3.67434	3.37349	0.224899	1.62141	75.7485	5.0499	4.73288	0	0	31	15	0	2	5	16	0	10	0	4	1	0	0	0	0	0	0	208.444	128.667	301.667	190.667	204	255	0	0	0	104	135	249	266
Ammonium Alginate	O=C(O)C1C(OC2C(O)([H])C(O)C(OC)C(C(O)=O)O2)C(O)C(O)C(OC)O1	20.2697	18.1288	2	0	32.9111	2.47588	4.95176	32.9111	1.21893	4.20131	4.62508	0.171299	2.52475	168.899	6.25553	6.12255	0	0	49	27	0	0	13	22	0	14	0	13	0	0	0	0	0	0	0	526	400	657	926	828	772	643	587	615	160	208	333	392
Vitamin C	O=C1C(O)=C(O)[C@]([C@@H](O)CO)([H])O1	8.76108	9.01779	0	0	14.6881	2.40255	4.59264	14.6881	1.22401	3.38718	3.10634	0.258862	1.31577	47.5058	3.95882	4.04317	0	0	20	12	0	0	6	8	0	6	0	6	0	0	0	0	0	0	0	242	190	299	341	204	142	55	0	0	66	82	119	108
Aspartic acid	OC([C@@H](N)CC(O)=O)=O	6.16336	6.5159	2	1	9.33533	2.11688	4.23377	9.33533	1.03726	3.02833	2.77452	0.308279	0.915116	24.0625	2.67361	3.07529	0	0	16	9	0	0	5	7	0	4	1	4	0	0	0	0	0	0	0	176	123	153	116	121	121	0	0	0	43	47	64	62
Ferulic acid	OC1=C(OC)C=C(/C=C/C(O)=O)C=C1	10.1872	9.31277	1	0	16.9291	2.29277	4.58554	16.9291	1.20922	3.52066	3.27735	0.234096	1.52351	75.7741	5.41244	4.66423	6	6	24	14	0	0	4	10	0	10	0	4	0	0	0	0	0	0	0	232	200	259	234	169	145	135	134	66	74	85	121	125
Methyl4-hydroxybenzoate	OC1=CC=C(C(OC)=O)C=C1	7.95651	7.52178	0	0	13.6197	2.25087	4.50175	13.6197	1.23815	3.28669	3.095	0.281364	1.2251	39.0224	3.54749	3.75945	6	6	19	11	0	0	3	8	0	8	0	3	0	0	0	0	0	0	0	182	156	208	170	114	74	64	5	0	58	67	94	92
Aspirin	O=C(O)C1=C(OC(C)=O)C=CC=C1	9.54907	9.03919	1	0	15.285	2.30677	4.61354	15.285	1.17577	3.45086	3.25393	0.250302	1.44223	53.7177	4.13213	4.24611	6	6	21	13	0	0	4	8	0	9	0	4	0	0	0	0	0	0	0	234	203	274	250	251	159	98	0	0	68	78	111	114
Suberic acid	OC(CCCCCCC(O)=O)=O	8.21573	7.74514	2	0	13.5175	2	4	13.5175	1.12646	3.3061	3.33333	0.277778	1.38629	37.9706	3.16421	3.81913	0	0	26	12	0	0	4	14	0	8	0	4	0	0	0	0	0	0	0	178	124	136	72	68	64	60	60	88	60	70	102	110
Propylparaben	OC1=CC=C(C(OCCC)=O)C=C1	9.37073	8.56608	0	0	16.1296	2.25785	4.51569	16.1296	1.24074	3.44405	3.22475	0.248057	1.43322	67.926	5.22508	4.48078	6	6	25	13	0	0	3	12	0	10	0	3	0	0	0	0	0	0	0	190	168	226	194	144	102	86	24	14	70	83	119	123
Celecoxib	O=S(C1=CC=C(N2N=C(C(F)(F)F)C=C2C3=CC=C(C)C=C3)C=C1)(N)=O	20.6174	16.6771	0	0	31.7037	2.48934	4.86796	31.7037	1.21937	4.19367	4.35104	0.167348	2.42593	197.328	7.58952	6.24038	17	17	40	26	0	0	9	14	0	17	3	2	1	0	3	0	0	0	3	472.444	373.667	745	608	599.667	531.333	557	523.333	397.667	156	189	279	305
Lactic acid	CC(C)C(O)=O	3.93265	4.24438	1	0	6	2	4	6	1	2.61085	2.3094	0.3849	0.326163	11.53	1.92167	1.93413	0	0	14	6	0	0	2	8	0	4	0	2	0	0	0	0	0	0	0	88	62	72	22	0	0	0	0	0	30	31	46	40
Embonic acid(Pamoic acid)	OC1=C(C(O)=O)C=C(C=CC=C2)C2=C1CC3=C(C=CC=C4)C4=CC(C(O)=O)=C3O	22.8794	18.2476	2	0	37.3507	2.50953	5.01906	37.3507	1.28795	4.30892	4.83553	0.166742	2.6407	206.572	7.12318	6.39536	20	22	45	29	0	0	6	16	0	23	0	6	0	0	0	0	0	0	0	458	454	682	742	794	726	762	706	617	174	220	342	410
Sebacic acid	OC(CCCCCCCCC(O)=O)=O	9.62995	8.67223	2	0	16.0533	2	4	16.0533	1.14667	3.46065	3.61814	0.258438	1.62243	48.6113	3.47223	4.22033	0	0	32	14	0	0	4	18	0	10	0	4	0	0	0	0	0	0	0	186	132	144	80	76	72	68	64	60	72	86	128	142
Hippuric acid	OC(CNC(C1=CC=CC=C1)=O)=O	9.48012	8.69993	1	0	16.1094	2.23001	4.46002	16.1094	1.23919	3.44373	3.23485	0.248835	1.43635	60.6477	4.66521	4.36745	6	6	22	13	0	0	4	9	0	9	1	3	0	0	0	0	0	0	0	210	176	224	194	168	176	96	78	33	67	79	109	113
Caprylicacid	CCCCCCCC(O)=O	6.58274	6.49035	1	0	11.3426	1.96962	3.93923	11.3426	1.13426	3.11424	2.92979	0.292979	1.07493	33.8064	3.38064	3.52065	0	0	26	10	0	0	2	16	0	8	0	2	0	0	0	0	0	0	0	102	74	78	44	40	36	32	26	11	52	62	95	103
ButylatedHydroxytoluene	CC(C)(C)C1=C(O)C(C(C)(C)C)=CC(C)=C1	12.2819	11.7598	0	0	17.5287	2.45784	4.91567	17.5287	1.09555	3.68104	3.62877	0.226798	1.7589	64.4367	4.02729	4.63569	6	6	40	16	0	0	1	24	0	15	0	1	0	0	0	0	0	0	0	146	160	213	224	150	53	9	0	0	108	122	234	245
Sorbitol	OC[C@H](O)[C@@H](O)[C@H](O)[C@H](O)CO	8.09441	8.78007	0	0	14.1957	2.24698	4.49396	14.1957	1.18297	3.32338	3.09178	0.257648	1.31107	42.1213	3.51011	3.92288	0	0	26	12	0	0	6	14	0	6	0	6	0	0	0	0	0	0	0	194	119	170	256	192	129	70	25	0	64	81	118	131
Betaine	[O-]C(C[N+](C)(C)C)=O	5.64528	5.87393	1	1	7.38465	2.14896	4.29792	7.38465	0.923081	2.92244	2.61183	0.326479	0.736908	19.5512	2.44389	2.74989	0	0	19	8	0	0	3	11	0	5	1	2	0	0	0	0	0	0	0	124	80	93	64	39	0	0	0	0	45	45	86	63
6-hydroxynicotinic acid	OC(C(C=C1)=CNC1=O)=O	7.3588	6.90974	1	0	11.9362	2.23607	4.47214	11.9362	1.19362	3.19724	2.99535	0.299535	1.09706	31.9769	3.19769	3.46501	6	6	15	10	0	0	4	5	0	6	1	3	0	0	0	0	0	0	0	188	157	213	167	117	68	66	0	0	51	59	78	75
Nicotinic acid	O=C(O)C1=CN=CC=C1	6.5423	6.2361	1	0	11.19	2.19399	4.38799	11.19	1.24333	3.08977	2.85639	0.317376	0.944197	27.6091	3.06768	3.21279	6	6	14	9	0	0	3	5	0	6	1	2	0	0	0	0	0	0	0	154	132	172	134	100	33	0	0	0	45	52	68	63
Mannitol	OC[C@@H](O)[C@@H](O)[C@H](O)[C@H](O)CO	8.09441	8.78007	0	0	14.1957	2.24698	4.49396	14.1957	1.18297	3.32338	3.09178	0.257648	1.31107	42.1213	3.51011	3.92288	0	0	26	12	0	0	6	14	0	6	0	6	0	0	0	0	0	0	0	194	119	170	256	192	129	70	25	0	64	81	118	131
Proline	OC(C1CCCN1)=O	5.83519	6.01963	1	1	9.67499	2.21051	4.27459	9.67499	1.20937	2.98438	2.69293	0.336616	0.767485	22.9029	2.86287	2.90812	0	0	17	8	0	0	3	9	0	5	1	2	0	0	0	0	0	0	0	114	90	119	82	44	0	0	0	0	45	57	87	84
Hexamethylenetetramine	N1(C2)CN3CN(C1)CN2C3	8.48528	6.9282	0	4	13.3843	2.44949	4.89898	13.3843	1.33843	3.3228	3.14626	0.314626	1.14622	37.562	3.7562	3.62599	0	0	22	10	0	4	4	12	0	6	4	0	0	0	0	0	0	0	0	124	120	198	120	12	0	0	0	0	72	96	180	168
Dimethylsulfoxide	O=S(C)C	2.44949	2.44949	0	0	3.4641	1.73205	3.4641	3.4641	0.866025	2.17806	1.93185	0.482963	-0.257812	5.58363	1.39591	0.803548	0	0	10	4	0	0	2	6	0	2	0	1	1	0	0	0	0	0	0	38.4444	5.33333	13	0	0	0	0	0	0	18	15	27	12
SulfurDioxide	O=S=O	1.41421	1.41421	0	0	2.82843	1.41421	2.82843	2.82843	0.942809	1.84946	1.70711	0.569036	-0.669173	3.36359	1.1212	0.00903476	0	0	3	3	0	0	3	0	0	0	0	2	1	0	0	0	0	0	0	72.4444	8	36	0	0	0	0	0	0	6	4	1	0
n,n-dimethylacetamide	CC(N(C)C)=O	3.93265	4.24438	0	0	6	2	4	6	1	2.61085	2.3094	0.3849	0.326163	11.53	1.92167	1.93413	0	0	15	6	0	0	2	9	0	4	1	1	0	0	0	0	0	0	0	80	58	50	14	0	0	0	0	0	31	30	50	40
Serine	OC[C@H](N)C(O)=O	4.53037	5.00409	1	1	7.66299	2.05288	4.10576	7.66299	1.09471	2.76632	2.45983	0.351405	0.543418	15.7116	2.24452	2.39773	0	0	14	7	0	0	4	7	0	3	1	3	0	0	0	0	0	0	0	124	81	104	90	55	0	0	0	0	33	37	48	44
Aspartame	O=C(O)C[C@H](N)C(N[C@@H](CC1=CC=CC=C1)C(OC)=O)=O	15.3153	13.9707	1	1	25.3677	2.28753	4.57507	25.3677	1.20798	3.916	4.05726	0.193203	2.14245	121.015	5.7626	5.53785	6	6	39	21	0	0	7	18	0	14	2	5	0	0	0	0	0	0	0	330	271	348	335	376	457	326	273	264	114	137	206	232
Benzamide	NC(C1=CC=CC=C1)=O	6.5423	6.2361	0	0	11.19	2.19399	4.38799	11.19	1.24333	3.08977	2.85639	0.317376	0.944197	27.6091	3.06768	3.21279	6	6	16	9	0	0	2	7	0	7	1	1	0	0	0	0	0	0	0	122	112	138	108	66	27	0	0	0	47	55	76	74
DL-phenylalanine	NC(C(O)=O)CC1=CC=CC=C1	8.77301	8.18202	1	1	14.5659	2.21161	4.42322	14.5659	1.21383	3.36811	3.25983	0.271652	1.364	43.5896	3.63247	3.95714	6	6	23	12	0	0	3	11	0	9	1	2	0	0	0	0	0	0	0	160	139	173	143	110	117	87	33	0	65	78	114	121
D-Alanine	C[C@@H](N)C(O)=O	3.93265	4.24438	1	1	6	2	4	6	1	2.61085	2.3094	0.3849	0.326163	11.53	1.92167	1.93413	0	0	13	6	0	0	3	7	0	3	1	2	0	0	0	0	0	0	0	96	68	82	44	0	0	0	0	0	29	30	41	35
Cholic Acid	O[C@@H]1CC[C@@]2(C)[C@@](C[C@@H](O)[C@]3([H])[C@]2([H])C[C@H](O)[C@@]4(C)[C@@]3([H])CC[C@]4([H])[C@H](C)CCC(O)=O)([H])C1	23.1318	18.7128	1	0	36.385	2.65531	5.26749	36.385	1.25465	4.3227	4.46842	0.154084	2.56175	450.59	15.5376	7.17527	0	0	69	29	0	0	5	40	0	24	0	5	0	0	0	0	0	0	0	304	284	413	440	456	412	366	289	259	206	284	533	710
Glycine	NCC(O)=O	3.04721	3.30518	1	1	5.22625	1.84776	3.69552	5.22625	1.04525	2.40858	2.13099	0.426197	0.0634378	8.62987	1.72597	1.46208	0	0	10	5	0	0	3	5	0	2	1	2	0	0	0	0	0	0	0	90	58	64	33	0	0	0	0	0	21	21	25	19
Pyrazinamide	NC(C1=NC=CN=C1)=O	6.5423	6.2361	0	0	11.19	2.19399	4.38799	11.19	1.24333	3.08977	2.85639	0.317376	0.944197	27.6091	3.06768	3.21279	6	6	14	9	0	0	4	5	0	5	3	1	0	0	0	0	0	0	0	154	138	172	150	84	27	0	0	0	45	51	67	59
4-Cyanopyridine	N#CC1=CC=NC=C1	5.65685	5.42766	0	0	10.4243	2.13578	4.27156	10.4243	1.30304	2.96934	2.718	0.33975	0.776754	23.561	2.94512	2.93645	6	6	12	8	0	0	2	4	0	6	2	0	0	0	0	0	0	0	0	118	108	116	92	50	25	0	0	0	38	44	57	50
Pyrazine	C1=CN=CC=N1	4.24264	4	0	0	8	2	4	8	1.33333	2.68762	2.44949	0.408248	0.385054	14.6969	2.44949	2.17681	6	6	10	6	0	0	2	4	0	4	2	0	0	0	0	0	0	0	0	86	78	78	43	0	0	0	0	0	28	32	40	30
Isoniazid	O=C(NN)C1=CC=NC=C1	7.14002	6.87336	0	0	12.8573	2.21432	4.42864	12.8573	1.28573	3.18888	2.96301	0.296301	1.08621	33.9683	3.39683	3.52543	6	6	17	10	0	0	4	7	0	6	3	1	0	0	0	0	0	0	0	154	140	172	152	98	68	15	0	0	51	60	81	80
2-Picolonic acid	OC(C1=NC=CC=C1)=O	6.5423	6.2361	1	0	11.19	2.19399	4.38799	11.19	1.24333	3.08977	2.85639	0.317376	0.944197	27.6091	3.06768	3.21279	6	6	14	9	0	0	3	5	0	6	1	2	0	0	0	0	0	0	0	154	134	178	148	78	33	0	0	0	45	52	67	62
Propanone	CC(C)=O	2.44949	2.44949	0	0	3.4641	1.73205	3.4641	3.4641	0.866025	2.17806	1.93185	0.482963	-0.257812	5.58363	1.39591	0.803548	0	0	10	4	0	0	1	6	0	3	0	1	0	0	0	0	0	0	0	54	32	13	0	0	0	0	0	0	18	15	27	12
Isonicotinamide	O=C(N)C1=CC=NC=C1	6.5423	6.2361	0	0	11.19	2.19399	4.38799	11.19	1.24333	3.08977	2.85639	0.317376	0.944197	27.6091	3.06768	3.21279	6	6	15	9	0	0	3	6	0	6	2	1	0	0	0	0	0	0	0	138	124	150	116	74	45	0	0	0	46	53	72	68
L-Pyroglutamic acid	OC([C@H](CC1)NC1=O)=O	6.65169	6.74143	1	0	10.668	2.26717	4.34256	10.668	1.18534	3.10325	2.81842	0.313158	0.930817	27.5033	3.05593	3.20895	0	0	16	9	0	0	4	7	0	5	1	3	0	0	0	0	0	0	0	162	126	165	120	90	66	0	0	0	49	60	90	82
Nicotinamide	NC(C1=CC=CN=C1)=O	6.5423	6.2361	0	0	11.19	2.19399	4.38799	11.19	1.24333	3.08977	2.85639	0.317376	0.944197	27.6091	3.06768	3.21279	6	6	15	9	0	0	3	6	0	6	2	1	0	0	0	0	0	0	0	138	124	152	122	84	27	0	0	0	46	53	72	67
Theobromine	O=C(NC(N1C)=O)C2=C1N=CN2C	10.1349	9.62782	0	0	16.2035	2.4751	4.85646	16.2035	1.24642	3.51444	3.34917	0.257628	1.47108	51.9227	3.99406	4.21212	9	10	21	13	0	0	6	8	0	7	4	2	0	0	0	0	0	0	0	238	232	355	322	259	59	6	0	0	78	95	152	142
Chlorobenzene	ClC1=CC=CC=C1	5.05914	4.78585	0	0	8.72057	2.101	4.20201	8.72057	1.2458	2.8443	2.59417	0.370595	0.59659	18.4116	2.63023	2.55631	6	6	12	7	0	0	1	5	0	6	0	0	0	0	0	1	0	0	1	61.6049	63.1111	64.6667	34.6667	2.33333	0	0	0	0	35	41	54	46
2,3,5,6-Tetramethylpyrazine	CC1=C(C)N=C(C)C(C)=N1	7.42775	7.16535	0	0	11.6832	2.30278	4.60555	11.6832	1.16832	3.20635	2.98653	0.298653	1.09411	30.9372	3.09372	3.43196	6	6	22	10	0	0	2	12	0	8	2	0	0	0	0	0	0	0	0	118	128	148	95	18	2	0	0	0	60	66	110	104
Piperazine	[H]N1CCN([H])CC1	4.24264	4	0	2	8	2	4	8	1.33333	2.68762	2.44949	0.408248	0.385054	14.6969	2.44949	2.17681	0	0	16	6	0	0	2	10	0	4	2	0	0	0	0	0	0	0	0	48	40	40	24	0	0	0	0	0	34	44	68	68
Caprolactam	O=C1CNCCCC1	5.76624	5.46547	0	1	9.99435	2.09118	4.065	9.99435	1.24929	2.96799	2.77133	0.346417	0.796185	22.7007	2.83758	2.89925	0	0	19	8	0	0	2	11	0	6	1	1	0	0	0	0	0	0	0	88	68	72	80	24	0	0	0	0	45	57	89	103
Anisole	COC1=CC=CC=C1	5.65685	5.42766	0	0	10.4243	2.13578	4.27156	10.4243	1.30304	2.96934	2.718	0.33975	0.776754	23.561	2.94512	2.93645	6	6	16	8	0	0	1	8	0	7	0	1	0	0	0	0	0	0	0	98	90	100	72	24	3	0	0	0	42	49	70	65
Glycerol	C(C(CO)O)O	3.64492	4.0975	0	0	6.89898	1.93185	3.8637	6.89898	1.14983	2.5958	2.3008	0.383466	0.322429	12.2612	2.04353	1.99561	0	0	14	6	0	0	3	8	0	3	0	3	0	0	0	0	0	0	0	92	47	54	70	25	0	0	0	0	28	33	44	39
n-butylacetate	CCCCOC(=O)C	5.16853	5.36185	0	0	8.76257	1.94986	3.89971	8.76257	1.09532	2.88799	2.63927	0.329909	0.747359	21.8817	2.73522	2.86251	0	0	20	8	0	0	2	12	0	6	0	2	0	0	0	0	0	0	0	102	74	74	36	28	18	7	0	0	40	44	67	65
Propylene Glycol	OCC(O)C	3.04721	3.30518	0	0	5.22625	1.84776	3.69552	5.22625	1.04525	2.40858	2.13099	0.426197	0.0634378	8.62987	1.72597	1.46208	0	0	13	5	0	0	2	8	0	3	0	2	0	0	0	0	0	0	0	64	34	32	30	0	0	0	0	0	24	26	38	30
MTBE	CC(C)(OC)C	4.01229	4.28482	0	0	5.81863	2.07431	4.14863	5.81863	0.969771	2.62636	2.2855	0.380917	0.315759	11.6374	1.93956	1.9434	0	0	18	6	0	0	1	12	0	5	0	1	0	0	0	0	0	0	0	56	42	25	3	0	0	0	0	0	36	34	67	51
Picolinamide	NC(C1=NC=CC=C1)=O	6.5423	6.2361	0	0	11.19	2.19399	4.38799	11.19	1.24333	3.08977	2.85639	0.317376	0.944197	27.6091	3.06768	3.21279	6	6	15	9	0	0	3	6	0	6	2	1	0	0	0	0	0	0	0	138	126	158	132	66	27	0	0	0	46	53	71	66
Acetamide	CC(N)=O	2.44949	2.44949	0	0	3.4641	1.73205	3.4641	3.4641	0.866025	2.17806	1.93185	0.482963	-0.257812	5.58363	1.39591	0.803548	0	0	9	4	0	0	2	5	0	2	1	1	0	0	0	0	0	0	0	62	40	27	0	0	0	0	0	0	17	14	22	10
GlycolStearate	OCCOC(CCCCCCCCCCCCCCCCC)=O	15.6657	12.091	0	0	28.3391	2.04592	4.09184	28.3391	1.23213	3.95433	3.59971	0.156509	2.11376	512.278	22.273	7.07178	0	0	63	23	0	0	3	40	0	20	0	3	0	0	0	0	0	0	0	186	144	156	140	122	126	92	88	84	128	163	255	298
Tert-butanol	CC(C)(O)C	3.4641	3.4641	0	0	4	2	4	4	0.8	2.44447	2.12132	0.424264	0.0588915	8	1.6	1.38629	0	0	15	5	0	0	1	10	0	4	0	1	0	0	0	0	0	0	0	44	32	18	0	0	0	0	0	0	30	26	55	30
1-butanol	CCCCO	2.82843	3.14626	0	0	5.4641	1.73205	3.4641	5.4641	1.09282	2.39017	2.1547	0.43094	0.0745046	8.98672	1.79734	1.5026	0	0	15	5	0	0	1	10	0	4	0	1	0	0	0	0	0	0	0	38	20	16	12	5	0	0	0	0	24	28	42	40
Cyclohexane	C1CCCCC1	4.24264	4	0	0	8	2	4	8	1.33333	2.68762	2.44949	0.408248	0.385054	14.6969	2.44949	2.17681	0	0	18	6	0	0	0	12	0	6	0	0	0	0	0	0	0	0	0	24	24	24	12	0	0	0	0	0	36	48	78	84
Training and Test Datasets		Descriptors
2-Nitrobenzoic acid	C1=CC=C(C(=C1)C(=O)O)[N+](=O)[O-]	8.80152	8.51943	1	0	14.3875	2.3226	4.64519	14.3875	1.19895	3.37616	3.17765	0.264804	1.33846	43.8086	3.65072	3.96215	6	6	17	12	0	0	5	5	0	7	1	4	0	0	0	0	0	0	0	246	195	290	265	264	215	0	0	0	61	72	97	102
3-Nitrobenzoic acid	C1=CC(=CC(=C1)[N+](=O)[O-])C(=O)O	8.84196	8.35636	1	0	14.3792	2.28825	4.57649	14.3792	1.19827	3.37579	3.214	0.267833	1.34984	43.4458	3.62048	3.95383	6	6	17	12	0	0	5	5	0	7	1	4	0	0	0	0	0	0	0	246	194	283	233	208	168	143	0	0	61	71	94	98
4-Nitrobenzoic acid	C1=CC(=CC=C1C(=O)O)[N+](=O)[O-]	8.84196	8.19329	1	0	14.3834	2.27841	4.55683	14.3834	1.19861	3.37578	3.22646	0.268872	1.35371	43.3378	3.61148	3.95135	6	6	17	12	0	0	5	5	0	7	1	4	0	0	0	0	0	0	0	246	194	282	226	176	112	96	143	0	61	71	93	95
2-Fluorobenzoic acid	C1=CC=C(C(=C1)C(=O)O)F	7.31836	7.06919	1	0	11.9458	2.26718	4.53437	11.9458	1.19458	3.19767	2.96474	0.296474	1.08679	32.367	3.2367	3.47714	6	6	15	10	0	0	3	5	0	7	0	2	0	0	1	0	0	0	1	194	155	217	204	176	33	0	0	0	51	60	80	76
3-Fluorobenzoic acid	C1=CC(=CC(=C1)F)C(=O)O	7.3588	6.98947	1	0	11.9087	2.24284	4.48568	11.9087	1.19087	3.19725	2.98808	0.298808	1.09463	32.0539	3.20539	3.46742	6	6	15	10	0	0	3	5	0	7	0	2	0	0	1	0	0	0	1	194	154	207	176	138	110	0	0	0	51	59	79	76
4-Fluorobenzoic acid	C1=CC(=CC=C1C(=O)O)F	7.3588	6.90974	1	0	11.9362	2.23607	4.47214	11.9362	1.19362	3.19724	2.99535	0.299535	1.09706	31.9769	3.19769	3.46501	6	6	15	10	0	0	3	5	0	7	0	2	0	0	1	0	0	0	1	194	154	206	166	110	72	77	0	0	51	59	78	75
2-Aminobenzoic acid	C1=CC=C(C(=C1)C(=O)O)N	7.31836	7.06919	1	0	11.9458	2.26718	4.53437	11.9458	1.19458	3.19767	2.96474	0.296474	1.08679	32.367	3.2367	3.47714	6	6	17	10	0	0	3	7	0	7	1	2	0	0	0	0	0	0	0	154	139	189	164	120	33	0	0	0	53	62	87	86
3-Aminobenzoic acid	C1=CC(=CC(=C1)N)C(=O)O	7.3588	6.98947	1	0	11.9087	2.24284	4.48568	11.9087	1.19087	3.19725	2.98808	0.298808	1.09463	32.0539	3.20539	3.46742	6	6	17	10	0	0	3	7	0	7	1	2	0	0	0	0	0	0	0	154	138	183	148	110	66	0	0	0	53	61	86	84
2-Methoxybenzoic acid	COC1=CC=CC=C1C(=O)O	7.91607	7.71046	1	0	13.6251	2.28825	4.57649	13.6251	1.23865	3.28709	3.0604	0.278218	1.21385	38.9911	3.54464	3.75864	6	6	19	11	0	0	3	8	0	8	0	3	0	0	0	0	0	0	0	182	157	214	201	172	47	0	0	0	58	68	97	98
3-Methoxybenzoic acid	COC1=CC=CC(=C1)C(=O)O	7.95651	7.58116	1	0	13.6133	2.25911	4.51822	13.6133	1.23757	3.2867	3.08652	0.280592	1.22235	39.0408	3.54917	3.75992	6	6	19	11	0	0	3	8	0	8	0	3	0	0	0	0	0	0	0	182	156	205	175	138	106	11	0	0	58	67	95	96
4-Methoxybenzoic acid	COC1=CC=C(C=C1)C(=O)O	7.95651	7.45186	1	0	13.6197	2.25087	4.50175	13.6197	1.23815	3.28669	3.095	0.281364	1.2251	39.1035	3.55486	3.76152	6	6	19	11	0	0	3	8	0	8	0	3	0	0	0	0	0	0	0	182	156	204	166	112	72	70	11	0	58	67	94	94
2-Methylbenzoic acid	CC1=CC=CC=C1C(=O)O	7.31836	7.06919	1	0	11.9458	2.26718	4.53437	11.9458	1.19458	3.19767	2.96474	0.296474	1.08679	32.367	3.2367	3.47714	6	6	18	10	0	0	2	8	0	8	0	2	0	0	0	0	0	0	0	146	131	175	144	92	33	0	0	0	54	63	92	91
3-Methylbenzoic acid	CC1=CC(=CC=C1)C(=O)O	7.3588	6.98947	1	0	11.9087	2.24284	4.48568	11.9087	1.19087	3.19725	2.98808	0.298808	1.09463	32.0539	3.20539	3.46742	6	6	18	10	0	0	2	8	0	8	0	2	0	0	0	0	0	0	0	146	130	171	134	96	44	0	0	0	54	62	91	88
4-Methylbenzoic acid	CC1=CC=C(C=C1)C(=O)O	7.3588	6.90974	1	0	11.9362	2.23607	4.47214	11.9362	1.19362	3.19724	2.99535	0.299535	1.09706	31.9769	3.19769	3.46501	6	6	18	10	0	0	2	8	0	8	0	2	0	0	0	0	0	0	0	146	130	170	130	86	48	11	0	0	54	62	90	87
2-Nitrobenzamide	C1=CC=C(C(=C1)C(=O)N)[N+](=O)[O-]	8.80152	8.51943	0	0	14.3875	2.3226	4.64519	14.3875	1.19895	3.37616	3.17765	0.264804	1.33846	43.8086	3.65072	3.96215	6	6	18	12	0	0	5	6	0	7	2	3	0	0	0	0	0	0	0	230	187	270	251	244	183	0	0	0	62	73	101	106
3-Nitrobenzamide	C1=CC(=CC(=C1)[N+](=O)[O-])C(=O)N	8.84196	8.35636	0	0	14.3792	2.28825	4.57649	14.3792	1.19827	3.37579	3.214	0.267833	1.34984	43.4458	3.62048	3.95383	6	6	18	12	0	0	5	6	0	7	2	3	0	0	0	0	0	0	0	230	186	263	221	194	154	117	0	0	62	72	98	102
4-Nitrobenzamide	C1=CC(=CC=C1C(=O)N)[N+](=O)[O-]	8.84196	8.19329	0	0	14.3834	2.27841	4.55683	14.3834	1.19861	3.37578	3.22646	0.268872	1.35371	43.3378	3.61148	3.95135	6	6	18	12	0	0	5	6	0	7	2	3	0	0	0	0	0	0	0	230	186	262	214	164	104	88	117	0	62	72	97	99
4-Hydroxybenzamide	C1=CC(=CC=C1C(=O)N)O	7.3588	6.90974	0	0	11.9362	2.23607	4.47214	11.9362	1.19362	3.19724	2.99535	0.299535	1.09706	31.9769	3.19769	3.46501	6	6	17	10	0	0	3	7	0	7	1	2	0	0	0	0	0	0	0	154	138	174	142	90	56	45	0	0	53	61	85	83
3-Fluorobenzamide	C1=CC(=CC(=C1)F)C(=O)N	7.3588	6.98947	0	0	11.9087	2.24284	4.48568	11.9087	1.19087	3.19725	2.98808	0.298808	1.09463	32.0539	3.20539	3.46742	6	6	16	10	0	0	3	6	0	7	1	1	0	0	1	0	0	0	1	178	146	187	164	124	90	0	0	0	52	60	83	80
4-Fluorobenzamide	C1=CC(=CC=C1C(=O)N)F	7.3588	6.90974	0	0	11.9362	2.23607	4.47214	11.9362	1.19362	3.19724	2.99535	0.299535	1.09706	31.9769	3.19769	3.46501	6	6	16	10	0	0	3	6	0	7	1	1	0	0	1	0	0	0	1	178	146	186	154	98	64	63	0	0	52	60	82	79
3-Aminobenzamide	C1=CC(=CC(=C1)N)C(=O)N	7.3588	6.98947	0	0	11.9087	2.24284	4.48568	11.9087	1.19087	3.19725	2.98808	0.298808	1.09463	32.0539	3.20539	3.46742	6	6	18	10	0	0	3	8	0	7	2	1	0	0	0	0	0	0	0	138	130	163	136	96	54	0	0	0	54	62	90	88
4-Aminobenzamide	C1=CC(=CC=C1C(=O)N)N	7.3588	6.90974	0	0	11.9362	2.23607	4.47214	11.9362	1.19362	3.19724	2.99535	0.299535	1.09706	31.9769	3.19769	3.46501	6	6	18	10	0	0	3	8	0	7	2	1	0	0	0	0	0	0	0	138	130	162	130	82	48	27	0	0	54	62	89	87
2-Methoxybenzamide	COC1=CC=CC=C1C(=O)N	7.91607	7.71046	0	0	13.6251	2.28825	4.57649	13.6251	1.23865	3.28709	3.0604	0.278218	1.21385	38.9911	3.54464	3.75864	6	6	20	11	0	0	3	9	0	8	1	2	0	0	0	0	0	0	0	166	149	194	187	148	39	0	0	0	59	69	101	102
3-Methoxybenzamide	COC1=CC=CC(=C1)C(=O)N	7.95651	7.58116	0	0	13.6133	2.25911	4.51822	13.6133	1.23757	3.2867	3.08652	0.280592	1.22235	39.0408	3.54917	3.75992	6	6	20	11	0	0	3	9	0	8	1	2	0	0	0	0	0	0	0	166	148	185	163	124	88	9	0	0	59	68	99	100
4-Methoxybenzamide	COC1=CC=C(C=C1)C(=O)N	7.95651	7.45186	0	0	13.6197	2.25087	4.50175	13.6197	1.23815	3.28669	3.095	0.281364	1.2251	39.1035	3.55486	3.76152	6	6	20	11	0	0	3	9	0	8	1	2	0	0	0	0	0	0	0	166	148	184	154	100	64	58	9	0	59	68	98	98
2-Methylbenzamide	CC1=CC=CC=C1C(=O)N	7.31836	7.06919	0	0	11.9458	2.26718	4.53437	11.9458	1.19458	3.19767	2.96474	0.296474	1.08679	32.367	3.2367	3.47714	6	6	19	10	0	0	2	9	0	8	1	1	0	0	0	0	0	0	0	130	123	155	130	78	27	0	0	0	55	64	96	95
3-Methylbenzamide	CC1=CC(=CC=C1)C(=O)N	7.3588	6.98947	0	0	11.9087	2.24284	4.48568	11.9087	1.19087	3.19725	2.98808	0.298808	1.09463	32.0539	3.20539	3.46742	6	6	19	10	0	0	2	9	0	8	1	1	0	0	0	0	0	0	0	130	122	151	122	82	36	0	0	0	55	63	95	92
Mesaconic acid	CC(=CC(=O)O)C(=O)O	6.16336	6.5159	2	0	9.33533	2.11688	4.23377	9.33533	1.03726	3.02833	2.77452	0.308279	0.915116	24.0625	2.67361	3.07529	0	0	15	9	0	0	4	6	0	5	0	4	0	0	0	0	0	0	0	180	132	172	108	99	121	0	0	0	42	43	56	52
p-Coumaric acid	C1=CC(=CC=C1C=CC(=O)O)O	8.81345	7.91661	1	0	14.4552	2.21305	4.42611	14.4552	1.2046	3.36778	3.15404	0.262837	1.33101	51.9458	4.32882	4.13252	6	6	20	12	0	0	3	8	0	9	0	3	0	0	0	0	0	0	0	188	163	201	149	118	117	97	64	55	62	71	97	98
2,3-Difluorobenzoic acid	C1=CC(=C(C(=C1)F)F)C(=O)O	8.09441	7.86119	1	0	13.1687	2.31833	4.63667	13.1687	1.19715	3.29504	3.0804	0.280036	1.22037	37.2791	3.38901	3.71374	6	6	15	11	0	0	4	4	0	7	0	2	0	0	2	0	0	0	2	250	190	280	309	236	110	0	0	0	56	66	87	82
2,5-Difluorobenzoic acid	C1=CC(=C(C=C1F)C(=O)O)F	8.13485	7.80879	1	0	13.1326	2.30504	4.61008	13.1326	1.19387	3.29467	3.08912	0.280829	1.2232	37.1827	3.38024	3.71115	6	6	15	11	0	0	4	4	0	7	0	2	0	0	2	0	0	0	2	250	189	266	261	250	159	0	0	0	56	65	87	83
2,3-Dihydroxybenzoic acid	C1=CC(=C(C(=C1)O)O)C(=O)O	8.09441	7.86119	1	0	13.1687	2.31833	4.63667	13.1687	1.19715	3.29504	3.0804	0.280036	1.22037	37.2791	3.38901	3.71374	6	6	17	11	0	0	4	6	0	7	0	4	0	0	0	0	0	0	0	202	174	250	251	194	88	0	0	0	58	68	93	93
2,4-Dihydroxybenzoic acid	C1=CC(=C(C=C1O)O)C(=O)O	8.13485	7.77034	1	0	12.6752	2.30278	4.60555	12.6752	1.15229	3.29467	3.09101	0.281001	1.22381	37.2127	3.38297	3.71196	6	6	17	11	0	0	4	6	0	7	0	4	0	0	0	0	0	0	0	202	173	240	228	197	64	55	0	0	58	67	93	90
3,4-Dihydroxybenzoic acid	C1=CC(=C(C=C1C(=O)O)O)O	8.13485	7.73189	1	0	13.1525	2.29246	4.58491	13.1525	1.19569	3.29465	3.10387	0.28217	1.22796	37.111	3.37372	3.70922	6	6	17	11	0	0	4	6	0	7	0	4	0	0	0	0	0	0	0	202	173	241	221	148	119	55	0	0	58	67	91	91
3,5-Dihydroxybenzoic acid	C1=C(C=C(C=C1O)O)C(=O)O	8.17529	7.77034	1	0	12.6171	2.28825	4.57649	12.6171	1.14701	3.2943	3.103	0.282091	1.22768	37.1228	3.3748	3.70954	6	6	17	11	0	0	4	6	0	7	0	4	0	0	0	0	0	0	0	202	172	233	214	195	143	0	0	0	58	66	93	90
4-Nitroaniline	C1=CC(=CC=C1N)[N+](=O)[O-]	7.3588	6.90974	0	0	11.9362	2.23607	4.47214	11.9362	1.19362	3.19724	2.99535	0.299535	1.09706	31.9769	3.19769	3.46501	6	6	16	10	0	0	4	6	0	6	2	2	0	0	0	0	0	0	0	178	146	202	154	106	64	39	0	0	52	60	82	79
4-Fluoro-3- nitroaniline	C1=CC(=C(C=C1N)[N+](=O)[O-])F	8.13485	7.80879	0	0	13.1326	2.30504	4.61008	13.1326	1.19387	3.29467	3.08912	0.280829	1.2232	37.1827	3.38024	3.71115	6	6	16	11	0	0	5	5	0	6	2	2	0	0	1	0	0	0	1	234	181	262	247	246	99	0	0	0	57	66	91	87
4-Chloro-3-nitroaniline	C1=CC(=C(C=C1N)[N+](=O)[O-])Cl	8.13485	7.80879	0	0	13.1326	2.30504	4.61008	13.1326	1.19387	3.29467	3.08912	0.280829	1.2232	37.1827	3.38024	3.71115	6	6	16	11	0	0	5	5	0	6	2	2	0	0	0	1	0	0	1	185.605	156.111	218.444	184.778	140.222	80.3333	0	0	0	57	66	91	87
4-Iodo-3-nitroaniline	C1=CC(=C(C=C1N)[N+](=O)[O-])I	8.13485	7.80879	0	0	13.1326	2.30504	4.61008	13.1326	1.19387	3.29467	3.08912	0.280829	1.2232	37.1827	3.38024	3.71115	6	6	16	11	0	0	5	5	0	6	2	2	0	0	0	0	0	1	1	185.024	153.622	214.089	178.556	129.644	78.4667	0	0	0	57	66	91	87
2-Chloro-5-nitroaniline	C1=CC(=C(C=C1[N+](=O)[O-])N)Cl	8.13485	7.73189	0	0	13.1525	2.29246	4.58491	13.1525	1.19569	3.29465	3.10387	0.28217	1.22796	37.111	3.37372	3.70922	6	6	16	11	0	0	5	5	0	6	2	2	0	0	0	1	0	0	1	185.605	156.111	217.444	171	131.111	94.1111	10.1111	0	0	57	66	89	87
2-Iodo-4-nitroaniline	C1=CC(=C(C=C1[N+](=O)[O-])I)N	8.13485	7.73189	0	0	13.1525	2.29246	4.58491	13.1525	1.19569	3.29465	3.10387	0.28217	1.22796	37.111	3.37372	3.70922	6	6	16	11	0	0	5	5	0	6	2	2	0	0	0	0	0	1	1	185.024	153.622	213.089	162.556	120.089	66.0222	39	0	0	57	66	89	87
2,4-Dinitrobenzoic acid	C1=CC(=C(C=C1[N+](=O)[O-])[N+](=O)[O-])C(=O)O	11.1012	10.5284	1	0	17.58	2.37533	4.75065	17.58	1.172	3.59823	3.48051	0.232034	1.65264	63.7332	4.24888	4.56017	6	6	19	15	0	0	8	4	0	7	2	6	0	0	0	0	0	0	0	354	269	415	379	404	398	265	143	0	76	89	119	131
2-Fluoro-5-nitrobenzoic acid	C1=CC(=C(C=C1[N+](=O)[O-])C(=O)O)F	9.61802	9.1508	1	0	15.1588	2.33775	4.67549	15.1588	1.16606	3.45792	3.3031	0.254084	1.45722	49.6012	3.81548	4.16638	6	6	17	13	0	0	6	4	0	7	1	4	0	0	1	0	0	0	1	302	229	342	318	317	209	234	0	0	66	77	102	105
2-Fluoro-5-nitro-aniline	C1=CC(=C(C=C1[N+](=O)[O-])N)F	8.13485	7.73189	0	0	13.1525	2.29246	4.58491	13.1525	1.19569	3.29465	3.10387	0.28217	1.22796	37.111	3.37372	3.70922	6	6	16	11	0	0	5	5	0	6	2	2	0	0	1	0	0	0	1	234	181	261	227	156	119	91	0	0	57	66	89	87
Formic acid	C(=O)O	1.41421	1.41421	1	0	2.82843	1.41421	2.82843	2.82843	0.942809	1.84946	1.70711	0.569036	-0.669173	3.36359	1.1212	0.00903476	0	0	5	3	0	0	2	2	0	1	0	2	0	0	0	0	0	0	0	70	33	30	0	0	0	0	0	0	8	7	5	2
Trifluoroacetic acid	C(=O)(C(F)(F)F)O	4.87657	5.20985	1	0	6.60272	2.17533	4.35066	6.60272	0.943246	2.79278	2.45369	0.350527	0.540918	14.7303	2.10433	2.33323	0	0	8	7	0	0	5	1	0	2	0	2	0	0	3	0	0	0	3	240	144	305	231	0	0	0	0	0	31	31	24	11
4-Chloro-3-nitrobenzoic acid	C1=CC(=C(C=C1C(=O)O)[N+](=O)[O-])Cl	9.61802	9.1508	1	0	15.1588	2.33775	4.67549	15.1588	1.16606	3.45792	3.3031	0.254084	1.45722	49.6012	3.81548	4.16638	6	6	17	13	0	0	6	4	0	7	1	4	0	0	0	1	0	0	1	253.605	204.111	298.444	257.778	225.222	182.111	151.556	0	0	66	77	102	105
Methyl gallate	COC(=O)C1=CC(=C(C(=C1)O)O)O	9.50863	9.16816	0	0	15.7513	2.35011	4.70023	15.7513	1.21164	3.45824	3.28442	0.252647	1.45155	52.2802	4.02155	4.21898	6	6	21	13	0	0	5	8	0	8	0	5	0	0	0	0	0	0	0	246	210	303	314	233	196	74	5	0	70	81	115	116
Furosemide	C1=COC(=C1)CNC2=CC(=C(C=C2C(=O)O)S(=O)(=O)N)Cl	16.1783	14.4334	1	0	25.1388	2.43478	4.8683	25.1388	1.19708	3.96016	3.85	0.183333	2.09001	186.782	8.89436	5.97188	11	11	32	21	0	0	9	11	0	12	2	5	1	0	0	1	0	0	1	340.049	259.778	463.111	383.63	391.222	339.667	439	240.667	160.667	119	143	208	220
Cyanuric acid monohydrate	C1(=O)NC(=O)NC(=O)N1.O	6.69213	6.35589	0	0	14.8839	2.22998	4.45168	14.8839	1.17431	3.28558	3.12636	0.28777	1.21939	74.4424	4.43505	3.80131	6	6	15	10	0	0	7	5	0	3	3	4	0	0	0	0	0	0	0	220	168	240	192	180	0	0	0	0	47	51	70	54
Ferulic acid	COC1=C(C=CC(=C1)C=CC(=O)O)O	10.1872	9.31277	1	0	16.9291	2.29277	4.58554	16.9291	1.20922	3.52066	3.27735	0.234096	1.52351	75.7741	5.41244	4.66423	6	6	24	14	0	0	4	10	0	10	0	4	0	0	0	0	0	0	0	232	200	259	234	169	145	135	134	66	74	85	121	125
Syringic acid (tetrahydrate)	COC1=CC(=CC(=C1O)OC)C(=O)O	10.1063	9.82108	1	0	16.8906	2.37024	4.74048	16.8906	1.20647	3.52785	3.36193	0.240138	1.54899	59.1743	4.22674	4.41696	6	6	24	14	0	0	5	10	0	9	0	5	0	0	0	0	0	0	0	258	220	311	338	270	222	78	0	0	76	88	130	137
Ethyl gallate (dihydrate)	CCOC(=O)C1=CC(=C(C(=C1)O)O)O	10.2157	9.69596	0	0	16.7326	2.35232	4.70465	16.7326	1.19519	3.52756	3.33871	0.238479	1.54206	69.2265	4.94475	4.57386	6	6	24	14	0	0	5	10	0	9	0	5	0	0	0	0	0	0	0	250	218	313	328	249	210	96	24	5	76	89	127	132
Chlorogenic acid	C1C(C(C(CC1(C(=O)O)O)OC(=O)C=CC2=CC(=C(C=C2)O)O)O)O	19.1265	15.9933	1	0	30.2575	2.44298	4.88597	30.2575	1.2103	4.12632	3.72789	0.149116	2.23213	556.874	22.2749	7.23863	6	6	43	25	0	0	9	18	0	16	0	9	0	0	0	0	0	0	0	434	368	533	594	521	540	452	374	291	146	181	277	318
Ellagic acid monohydrate	C1=C2C3=C(C(=C1O)O)OC(=O)C4=CC(=C(C(=C43)OC2=O)O)O	17.8892	14.1694	0	0	28.6692	2.61237	5.22473	28.6692	1.30315	4.06761	4.25548	0.193431	2.23666	130.039	5.91085	5.65629	16	19	28	22	0	0	8	6	0	14	0	8	0	0	0	0	0	0	0	454	448	742	908	872	833	470	187	90	136	173	272	316
Salicylamide	C1=CC=C(C(=C1)C(=O)N)O	7.31836	7.06919	0	0	11.9458	2.26718	4.53437	11.9458	1.19458	3.19767	2.96474	0.296474	1.08679	32.367	3.2367	3.47714	6	6	17	10	0	0	3	7	0	7	1	2	0	0	0	0	0	0	0	154	139	183	170	126	27	0	0	0	53	62	87	85
Vitamin B2	CC1=CC2=C(C=C1C)N(C3=NC(=O)NC(=O)C3=N2)CC(C(C(CO)O)O)O	20.9483	17.3625	0	0	33.9979	2.52741	5.05483	33.9979	1.25918	4.22343	4.31066	0.159654	2.45434	298.604	11.0594	6.69237	14	15	47	27	0	0	10	20	0	17	4	6	0	0	0	0	0	0	0	446	415	634	754	704	629	627	604	440	164	206	329	380
Glucosamine HCl	C(C1C(C(C(C(O1)O)N)O)O)O.Cl	8.76108	8.65165	0	1	14.8839	2.22998	4.45168	14.8839	1.17431	3.28558	3.12636	0.28777	1.21939	74.4424	4.43505	3.80131	0	0	27	13	0	0	7	14	0	6	1	5	0	0	0	1	0	0	1	194.444	142	228	290	190	96	15	0	0	72	93	145	161
Creatine	CN(CC(=O)O)C(=N)N	6.16336	6.5159	1	3	9.33533	2.11688	4.23377	9.33533	1.03726	3.02833	2.77452	0.308279	0.915116	24.0625	2.67361	3.07529	0	0	18	9	0	0	5	9	0	4	3	2	0	0	0	0	0	0	0	148	115	133	96	83	77	0	0	0	45	47	70	66
Acetyl-L-carnitine HCl	CC(=O)OC(CC(=O)O)C[N+](C)(C)C.[Cl-]	10.1067	10.091	2	1	14.8839	2.22998	4.45168	14.8839	1.17431	3.28558	3.12636	0.28777	1.21939	74.4424	4.43505	3.80131	0	0	33	15	0	0	6	18	0	9	1	4	0	0	0	1	0	0	1	202.79	154	173	143	188	168	131	0	0	80	86	155	149
Vitamin B1 hydrochloride	CC1=C(SC=[N+]1CC2=CN=C(N=C2N)C)CCO.Cl.[Cl-]	13.6419	12.1015	1	1	14.8839	2.22998	4.45168	14.8839	1.17431	3.28558	3.12636	0.28777	1.21939	74.4424	4.43505	3.80131	11	11	38	20	0	0	8	18	0	12	4	1	1	0	0	2	0	0	2	213.679	209.667	266.667	221.333	197	200.667	137.667	89.6667	74.6667	108	129	206	212
Baicalein	C1=CC=C(C=C1)C2=CC(=O)C3=C(O2)C=C(C(=C3O)O)O	15.7513	12.8267	0	0	25.8384	2.48472	4.96944	25.8384	1.29192	3.94014	3.94699	0.19735	2.0661	140.948	7.0474	5.64154	16	17	30	20	0	0	5	10	0	15	0	5	0	0	0	0	0	0	0	338	336	501	593	542	372	271	191	138	118	147	221	242
Luteolin	C1=CC(=C(C=C1C2=CC(=O)C3=C(C=C(C=C3O2)O)O)O)O	16.6082	13.3303	0	0	26.321	2.46743	4.93486	26.321	1.25338	3.98729	4.09128	0.194823	2.15079	132.807	6.32412	5.63083	16	17	31	21	0	0	6	10	0	15	0	6	0	0	0	0	0	0	0	370	361	527	601	555	375	353	291	228	124	152	230	248
Hesperidin	CC1C(C(C(C(O1)OCC2C(C(C(C(O2)OC3=CC(=C4C(=O)CC(OC4=C3)C5=CC(=C(C=C5)OC)O)O)O)O)O)O)O)O	33.8022	24.6792	0	0	54.8227	2.48448	4.96896	54.8227	1.27495	4.69437	5.19387	0.120788	3.10609	709.299	16.4953	8.02289	12	12	77	43	0	0	15	34	0	28	0	15	0	0	0	0	0	0	0	734	646	1005	1305	1122	905	1021	1093	1094	268	348	557	645
Rosmarinic acid	C1=CC(=C(C=C1CC(C(=O)O)OC(=O)C=CC2=CC(=C(C=C2)O)O)O)O	19.7363	16.1127	1	0	32.0416	2.3146	4.6292	32.0416	1.23237	4.15513	4.56876	0.175721	2.47475	167.357	6.43682	6.07564	12	12	42	26	0	0	8	16	0	18	0	8	0	0	0	0	0	0	0	446	395	543	556	456	504	486	511	420	144	172	248	272
Epicatechin gallate	C1C(C(OC2=CC(=CC(=C21)O)O)C3=CC(=C(C=C3)O)O)OC(=O)C4=CC(=C(C(=C4)O)O)O	25.3003	19.579	0	0	40.5565	2.48278	4.96557	40.5565	1.26739	4.40187	4.74552	0.148298	2.72035	308.109	9.62842	6.89361	18	18	50	32	0	0	10	18	0	22	0	10	0	0	0	0	0	0	0	560	532	790	911	827	819	779	800	809	192	239	368	423
Vitamin B9	C1=CC(=CC=C1C(=O)NC(CCC(=O)O)C(=O)O)NCC2=CN=C3C(=N2)C(=O)NC(=N3)N	24.6456	18.0744	2	0	39.9791	2.41063	4.82126	39.9791	1.24935	4.37448	3.94349	0.123234	2.53522	1853.92	57.9351	8.68821	16	17	51	32	0	0	13	19	0	19	7	6	0	0	0	0	0	0	0	552	511	718	713	658	636	609	500	446	181	220	326	362
Genistein	C1=CC(=CC=C1C2=COC3=CC(=CC(=C3C2=O)O)O)O	15.7917	12.6506	0	0	25.4519	2.47413	4.94825	25.4519	1.27259	3.93995	3.96848	0.198424	2.07153	131.283	6.56413	5.5705	16	17	30	20	0	0	5	10	0	15	0	5	0	0	0	0	0	0	0	338	332	480	549	530	335	279	222	138	118	146	222	240
Methylvanillin	COC1=C(C=C(C=C1)C=O)OC	8.44484	8.18884	0	0	15.2954	2.30128	4.60256	15.2954	1.27462	3.36917	3.1521	0.262675	1.33039	47.3697	3.94748	4.0403	6	6	22	12	0	0	3	10	0	9	0	3	0	0	0	0	0	0	0	194	163	207	222	139	89	45	6	0	64	75	112	112
Ethylvanillin	CCOC1=C(C=CC(=C1)C=O)O	8.55423	8.13931	0	0	14.9714	2.28953	4.57905	14.9714	1.24762	3.36883	3.13698	0.261415	1.32558	50.4478	4.20398	4.10326	6	6	22	12	0	0	3	10	0	9	0	3	0	0	0	0	0	0	0	186	161	206	214	141	99	48	6	0	64	76	110	113
Silibinin	COC1=C(C=CC(=C1)C2C(OC3=C(O2)C=C(C=C3)C4C(C(=O)C5=C(C=C(C=C5O4)O)O)O)CO)O	27.7197	20.2996	0	0	45.4699	2.51432	5.02864	45.4699	1.29914	4.50226	5.09366	0.145533	2.88076	383.173	10.9478	7.20125	18	18	57	35	0	0	10	22	0	25	0	10	0	0	0	0	0	0	0	594	567	863	1081	984	831	838	772	650	216	277	440	509
Diadzein	C1=CC(=CC=C1C2=COC3=C(C2=O)C=CC(=C3)O)O	15.0157	11.8371	0	0	24.7002	2.44745	4.8949	24.7002	1.30001	3.89002	3.92076	0.206356	2.00814	116.452	6.12903	5.39933	16	17	29	19	0	0	4	10	0	15	0	4	0	0	0	0	0	0	0	306	305	433	465	403	294	243	188	113	112	139	209	226
Melatonin	CC(=O)NCCC1=CNC2=C1C=C(C=C2)OC	12.8658	11.2443	0	0	21.6032	2.42108	4.72099	21.6032	1.27077	3.74904	3.4273	0.201606	1.7624	176.156	10.3621	5.702	9	10	33	17	0	0	4	16	0	13	2	2	0	0	0	0	0	0	0	230	223	281	229	198	182	148	143	89	100	122	194	201
Rutin hydrate	CC1C(C(C(C(O1)OCC2C(C(C(C(O2)OC3=C(OC4=CC(=CC(=C4C3=O)O)O)C5=CC(=C(C=C5)O)O)O)O)O)O)O)O.O	33.9401	25.8215	0	0	14.8839	2.22998	4.45168	14.8839	1.17431	3.28558	3.12636	0.28777	1.21939	74.4424	4.43505	3.80131	16	17	76	44	0	0	17	32	0	27	0	17	0	0	0	0	0	0	0	782	684	1090	1453	1283	1170	1272	1364	1336	268	344	544	630
1-Hydroxy-2-naphthoic acid	C1=CC=C2C(=C1)C=CC(=C2O)C(=O)O	10.773	9.43636	1	0	17.7305	2.41356	4.82712	17.7305	1.26646	3.57135	3.4523	0.246593	1.57551	61.6773	4.40552	4.45839	10	11	22	14	0	0	3	8	0	11	0	3	0	0	0	0	0	0	0	220	212	309	311	268	137	78	33	0	80	99	146	158
2-Hydroxy-1-naphthoic acid	C1=CC=C2C(=C1)C=CC(=C2C(=O)O)O	10.773	9.5318	1	0	17.6782	2.42325	4.8465	17.6782	1.26273	3.57136	3.44758	0.246256	1.57414	61.0319	4.35942	4.44787	10	11	22	14	0	0	3	8	0	11	0	3	0	0	0	0	0	0	0	220	212	308	319	299	162	48	0	0	80	99	148	161
3-Hydroxy-2-naphthoic acid	C1=CC=C2C=C(C(=CC2=C1)C(=O)O)O	10.8135	9.37691	1	0	17.6416	2.39854	4.79708	17.6416	1.26011	3.57106	3.46965	0.247832	1.58053	61.2418	4.37442	4.4513	10	11	22	14	0	0	3	8	0	11	0	3	0	0	0	0	0	0	0	220	211	301	294	261	155	93	33	0	80	98	145	155
6-Hydroxy-2-naphthoic acid	C1=CC2=C(C=CC(=C2)O)C=C1C(=O)O	10.8539	9.17622	1	0	17.6273	2.37926	4.75852	17.6273	1.25909	3.57076	3.4783	0.24845	1.58302	61.5799	4.39857	4.45681	10	11	22	14	0	0	3	8	0	11	0	3	0	0	0	0	0	0	0	220	210	292	263	206	156	102	64	55	80	97	143	152
Gallocatechin	C1C(C(OC2=CC(=CC(=C21)O)O)C3=CC(=C(C(=C3)O)O)O)O	17.3843	14.1093	0	0	27.6221	2.47202	4.94404	27.6221	1.25555	4.03268	4.27143	0.194156	2.24041	127.22	5.78275	5.63438	12	12	36	22	0	0	7	14	0	15	0	7	0	0	0	0	0	0	0	372	352	522	619	526	419	390	320	251	134	168	264	297
Sulfaproxyline	CC(C)OC1=CC=C(C=C1)C(=O)NS(=O)(=O)C2=CC=C(C=C2)N	17.6239	14.367	0	0	27.6898	2.38228	4.76456	27.6898	1.2039	4.04186	4.13459	0.179765	2.2523	185.187	8.05162	6.05428	12	12	41	23	0	0	7	18	0	16	2	4	1	0	0	0	0	0	0	332.444	261.333	453.667	402.667	428.667	338	338.667	230	232	134	160	240	259
Diethylbarbituric acid	CCC1(C(=O)NC(=O)NC1=O)CC	9.39734	9.40451	0	0	15.1915	2.44949	4.89898	15.1915	1.16858	3.46657	3.23574	0.248903	1.43662	50.0427	3.84944	4.17524	0	0	25	13	0	0	5	12	0	8	2	3	0	0	0	0	0	0	0	214	188	284	292	237	32	12	0	0	76	95	151	166
Sulfacetamide	CC(=O)NS(=O)(=O)C1=CC=C(C=C1)N	10.4839	9.7358	0	0	15.8993	2.35318	4.70636	15.8993	1.13567	3.5335	3.35821	0.239872	1.54788	60.1379	4.29556	4.43311	6	6	24	14	0	0	6	10	0	8	2	3	1	0	0	0	0	0	0	218.444	135.333	272.667	220.667	246.667	132	106	40	21	78	90	132	132
Diaminodiphenyl sulfone	C1=CC(=CC=C1N)S(=O)(=O)C2=CC=C(C=C2)N	13.1413	11.2438	0	0	21.0193	2.41987	4.83974	21.0193	1.23643	3.75744	3.68318	0.216658	1.8344	89.7406	5.27886	5.02755	12	12	29	17	0	0	5	12	0	12	2	2	1	0	0	0	0	0	0	226.444	169.333	324	304	257.333	204	180	84	52	100	122	180	194
Eosin	C1=CC=C(C(=C1)C2=C3C=C(C(=O)C(=C3OC4=C(C(=C(C=C24)Br)[O-])Br)Br)Br)C(=O)[O-].[Na+].[Na+]	22.9768	18.7212	2	2	14.8839	2.22998	4.45168	14.8839	1.17431	3.28558	3.12636	0.28777	1.21939	74.4424	4.43505	3.80131	20	21	37	31	0	0	11	6	0	20	0	5	0	0	0	0	4	0	4	484.269	463.148	719.778	757.148	784.986	754.481	758.586	665.963	370.868	168	213	319	368
Propionic acid	CCC(=O)O	3.04721	3.30518	1	0	5.22625	1.84776	3.69552	5.22625	1.04525	2.40858	2.13099	0.426197	0.0634378	8.62987	1.72597	1.46208	0	0	11	5	0	0	2	6	0	3	0	2	0	0	0	0	0	0	0	82	54	56	11	0	0	0	0	0	22	22	29	24
O-formylphenoxy acetic acid	C1=CC=C(C(=C1)C=O)OCC(=O)O	9.37073	8.73302	1	0	16.1176	2.26382	4.52764	16.1176	1.23981	3.44406	3.19701	0.245924	1.42458	61.7718	4.75167	4.38581	6	6	21	13	0	0	4	8	0	9	0	4	0	0	0	0	0	0	0	230	185	237	243	189	149	135	99	0	66	78	108	109
P-formylphenoxy acetic acid	C1=CC(=CC=C1C=O)OCC(=O)O	9.41117	8.40852	1	0	16.1094	2.23001	4.46002	16.1094	1.23919	3.44373	3.23485	0.248835	1.43635	61.3054	4.7158	4.37823	6	6	21	13	0	0	4	8	0	9	0	4	0	0	0	0	0	0	0	230	184	228	218	152	140	124	68	57	66	77	106	105
P-formylphenoxypropionic acid	CC(C=O)(C(=O)O)OC1=CC=CC=C1	10.2156	9.76621	1	0	16.9529	2.33037	4.66075	16.9529	1.21092	3.52782	3.34938	0.239241	1.54525	61.994	4.42814	4.46351	6	6	24	14	0	0	4	10	0	10	0	4	0	0	0	0	0	0	0	236	202	277	298	224	162	126	51	0	76	90	129	134
5-Chlorosalicylic acid	C1=CC(=C(C=C1Cl)C(=O)O)O	8.13485	7.80879	1	0	13.1326	2.30504	4.61008	13.1326	1.19387	3.29467	3.08912	0.280829	1.2232	37.1827	3.38024	3.71115	6	6	16	11	0	0	4	5	0	7	0	3	0	0	0	1	0	0	1	177.605	156.111	214.667	197.444	170.222	45.4444	0	0	0	57	66	90	88
Lamotrigine	C1=CC(=C(C(=C1)Cl)Cl)C2=C(N=C(N=N2)N)N	12.2966	10.7888	0	0	19.9442	2.40176	4.80351	19.9442	1.24651	3.69726	3.69174	0.230734	1.7761	73.267	4.57919	4.76411	12	12	23	16	0	0	7	7	0	9	5	0	0	0	0	2	0	0	2	217.21	241.222	326.667	307.827	232.778	175.111	101.222	38.4444	11.3333	89	106	152	155
Hesperetin	COC1=C(C=C(C=C1)C2CC(=O)C3=C(C=C(C=C3O2)O)O)O	17.2059	13.7729	0	0	27.5622	2.46848	4.93697	27.5622	1.25283	4.02889	4.1445	0.188386	2.21024	154.881	7.04003	5.83111	12	12	36	22	0	0	6	14	0	16	0	6	0	0	0	0	0	0	0	370	351	504	585	535	351	354	307	249	132	164	258	284
Norfloxacin	CCN1C=C(C(=O)C2=CC(=C(C=C21)N3CCNCC3)F)C(=O)O	17.8321	14.7033	1	1	29.6292	2.50444	5.00889	29.6292	1.28822	4.069	4.14902	0.180392	2.25578	173.115	7.52674	5.98687	10	11	41	23	0	0	7	18	0	16	3	3	0	0	1	0	0	0	1	372	347	516	590	592	484	360	264	151	140	179	286	340
Sinapic acid	COC1=CC(=CC(=C1O)OC)C=CC(=O)O	11.561	10.756	1	0	19.4006	2.35746	4.71492	19.4006	1.21254	3.65325	3.41187	0.213242	1.69727	102.006	6.37537	5.09503	6	6	28	16	0	0	5	12	0	11	0	5	0	0	0	0	0	0	0	276	237	318	331	258	185	174	204	77	86	99	146	154
Piceatannol	C1=CC(=C(C=C1C=CC2=CC(=CC(=C2)O)O)O)O	13.8321	11.4034	0	0	22.2756	2.30447	4.60893	22.2756	1.23753	3.80365	4.06909	0.226061	1.99121	81.2106	4.5117	4.98483	12	12	30	18	0	0	4	12	0	14	0	4	0	0	0	0	0	0	0	268	258	338	340	249	177	193	208	193	102	121	178	182
Niclosamide	C1=CC(=C(C=C1[N+](=O)[O-])Cl)NC(=O)C2=C(C=CC(=C2)Cl)O	16.0509	13.59	0	0	26.0467	2.36967	4.73935	26.0467	1.24032	3.95432	4.24222	0.202011	2.18702	109.186	5.19935	5.43499	12	12	29	21	0	0	8	8	0	13	2	4	0	0	0	2	0	0	2	345.21	312.222	445.111	434	411.778	300.556	254.556	227.778	231.605	114	137	193	208
Resveratrol	C1=CC(=CC=C1C=CC2=CC(=CC(=C2)O)O)O	13.0561	10.6514	0	0	21.0865	2.28516	4.57031	21.0865	1.24038	3.74624	3.84537	0.226198	1.8775	84.2741	4.9573	4.9647	12	12	29	17	0	0	3	12	0	14	0	3	0	0	0	0	0	0	0	236	231	291	274	216	158	167	170	140	96	114	168	171
1-Naphthoxyacetic acid	C1=CC=C2C(=C1)C=CC=C2OCC(=O)O	11.4516	9.68051	1	0	19.3839	2.37199	4.74397	19.3839	1.29226	3.62727	3.41162	0.227442	1.63265	95.1658	6.34438	4.96109	10	11	25	15	0	0	3	10	0	12	0	3	0	0	0	0	0	0	0	228	213	286	285	203	171	152	111	33	84	103	152	162
2-Naphthoxyacetic acid	C1=CC=C2C=C(C=CC2=C1)OCC(=O)O	11.492	9.44229	1	0	19.3624	2.3481	4.6962	19.3624	1.29082	3.62699	3.41737	0.227825	1.63434	100.336	6.68904	5.01399	10	11	25	15	0	0	3	10	0	12	0	3	0	0	0	0	0	0	0	228	212	277	263	184	165	135	107	78	84	102	150	157
Febuxostat	CC1=C(SC(=N1)C2=CC(=C(C=C2)OCC(C)C)C#N)C(=O)O	16.6486	14.2885	1	0	27.2108	2.42632	4.77137	27.2108	1.23685	3.9989	3.99656	0.181662	2.17389	197.755	8.98888	6.07549	11	11	38	22	0	0	6	16	0	16	2	3	1	0	0	0	0	0	0	318.444	298.333	400.333	388	399.667	296.333	282.333	246.333	184	126	150	232	235
3-Hydroxybenzoic acid	C1=CC(=CC(=C1)O)C(=O)O	7.3588	6.98947	1	0	11.9087	2.24284	4.48568	11.9087	1.19087	3.19725	2.98808	0.298808	1.09463	32.0539	3.20539	3.46742	6	6	16	10	0	0	3	6	0	7	0	3	0	0	0	0	0	0	0	170	146	195	162	124	88	0	0	0	52	60	82	80
4-Hydroxybenzoic acid	C1=CC(=CC=C1C(=O)O)O	7.3588	6.90974	1	0	11.9362	2.23607	4.47214	11.9362	1.19362	3.19724	2.99535	0.299535	1.09706	31.9769	3.19769	3.46501	6	6	16	10	0	0	3	6	0	7	0	3	0	0	0	0	0	0	0	170	146	194	154	102	64	55	0	0	52	60	81	79
Pyridoxine	CC1=NC=C(C(=C1O)CO)CO	8.58274	8.48419	0	0	14.8767	2.35219	4.70438	14.8767	1.23972	3.37685	3.15754	0.263129	1.33212	45.2609	3.77174	3.99477	6	6	23	12	0	0	4	11	0	8	1	3	0	0	0	0	0	0	0	182	155	215	226	174	102	5	0	0	67	81	123	130
[truncated: 1,336 more columns]
